# Supplementary material for: Applying molecular networking for targeted isolation of depsipeptides
Source: Royal Society of Chemistry journal article supplement (doi:10.1039/d0ra09388b), 2021-01-01
Supplement: d0ra09388b1.pdf [file d0ra09388b1.pdf]

# Applying Molecular Networking for Targeted Isolation of Depsipeptides

Xiao Lin <sup>abc†</sup>, Ling Chai <sup>d†</sup>, Hong Rui Zhu <sup>e</sup>, Yongjun Zhou <sup>e</sup>, Yaoyao Shen <sup>e</sup>, Kai Hao  
Chen<sup>e</sup>, Fan Sun <sup>e</sup>, Bu Ming Liu <sup>d</sup>, Shi Hai Xu <sup>\*b</sup>, Hou Wen Lin <sup>\*e</sup>

*Institute of Marine Drugs, Guangxi University of Chinese Medicine, Nanning 530200, P. R. China*

*College of Chemistry and Materials, Jinan University, Guangzhou 510632, P. R. China*

*College of Pharmacy, Jinan University, Guangzhou 510632, P. R. China*

*Guangxi Key Laboratory of Traditional Chinese Medicine Quality Standards, Guangxi Institute of Traditional Medical and  
Pharmaceutical Sciences, Nanning, 530022, P. R. China*

*Research Center for Marine Drugs, State Key Laboratory of Oncogenes and Related Genes, Department of Pharmacy, Ren Ji  
Hospital, School of Medicine, Shanghai Jiao Tong University, Shanghai 200127, P. R. China*

† These authors contributed equally to this work.

## Corresponding Author

\*E-mail: txush@jnu.edu.cn (S. H. Xu)

\*E-mail: franklin67@126.com (H. W. Lin).

## Supporting Information List

|                                                                                                   |    |
|---------------------------------------------------------------------------------------------------|----|
| Table S1. HRESIMS data of the compounds 1-10 .....                                                | 4  |
| Table S2. NMR (600 MHz, DMSO- <i>d</i> <sub>6</sub> ) data for Neoantimycin L (1) .....           | 5  |
| Table S3. NMR (600 MHz, DMSO- <i>d</i> <sub>6</sub> ) data for Unantimycin B1 (2).....            | 6  |
| Table S4. NMR (600 MHz, DMSO- <i>d</i> <sub>6</sub> ) data for Unantimycin B2 (3).....            | 7  |
| Table S5. NMR (600 MHz, DMSO- <i>d</i> <sub>6</sub> ) data for Unantimycin D1 (4) .....           | 8  |
| Table S6. NMR (600 MHz, DMSO- <i>d</i> <sub>6</sub> ) data for Unantimycin D2 (5) .....           | 9  |
| Table S7a. NMR (600 MHz, DMSO- <i>d</i> <sub>6</sub> ) data for NAT-G (6).....                    | 10 |
| Table S7b. NMR (600 MHz, DMSO- <i>d</i> <sub>6</sub> ) data for NAT-G (6).....                    | 12 |
| Table S8. NMR (600 MHz, DMSO- <i>d</i> <sub>6</sub> ) data for Unantimycin C1 (7).....            | 14 |
| Table S9. NMR (600 MHz, DMSO- <i>d</i> <sub>6</sub> ) data for Unantimycin C2 (8).....            | 16 |
| Table S10. <sup>1</sup> H NMR (600 MHz CDCl <sub>3</sub> ) Data for the MTPA Esters of Bhdo.....  | 18 |
| Figure S1 MS/MS spectrum of NAT-H (A), NAT-L (B), UAT-B1&B2 (C), and UAT-D1&D2 (D) .....          | 20 |
| Figure S2a <sup>1</sup> H NMR spectrum of 1 in DMSO- <i>d</i> <sub>6</sub> .....                  | 21 |
| Figure S2b <sup>13</sup> C NMR spectrum of 1 in DMSO- <i>d</i> <sub>6</sub> .....                 | 22 |
| Figure S2c HSQC spectrum of 1 in DMSO- <i>d</i> <sub>6</sub> .....                                | 23 |
| Figure S2d HMBC spectrum of 1 in DMSO- <i>d</i> <sub>6</sub> .....                                | 24 |
| Figure S2e <sup>1</sup> H- <sup>1</sup> H COSY spectrum of 1 in DMSO- <i>d</i> <sub>6</sub> ..... | 25 |
| Figure S2f ROESY spectrum of 1 in DMSO- <i>d</i> <sub>6</sub> .....                               | 26 |
| Figure S3a <sup>1</sup> H NMR spectrum of 2 in DMSO- <i>d</i> <sub>6</sub> .....                  | 27 |
| Figure S3b <sup>13</sup> C NMR spectrum of 2 in DMSO- <i>d</i> <sub>6</sub> .....                 | 28 |
| Figure S3c HSQC spectrum of 2 in DMSO- <i>d</i> <sub>6</sub> .....                                | 29 |
| Figure S3d HMBC spectrum of 2 in DMSO- <i>d</i> <sub>6</sub> .....                                | 30 |
| Figure S3e <sup>1</sup> H- <sup>1</sup> H COSY spectrum of 2 in DMSO- <i>d</i> <sub>6</sub> ..... | 31 |
| Figure S3f ROESY spectrum of 2 in DMSO- <i>d</i> <sub>6</sub> .....                               | 32 |
| Figure S4a <sup>1</sup> H NMR spectrum of 3 in DMSO- <i>d</i> <sub>6</sub> .....                  | 33 |
| Figure S4b <sup>13</sup> C NMR spectrum of 3 in DMSO- <i>d</i> <sub>6</sub> .....                 | 34 |
| Figure S4c HSQC spectrum of 3 in DMSO- <i>d</i> <sub>6</sub> .....                                | 35 |
| Figure S4d HMBC spectrum of 3 in DMSO- <i>d</i> <sub>6</sub> .....                                | 36 |
| Figure S4e <sup>1</sup> H- <sup>1</sup> H COSY spectrum of 3 in DMSO- <i>d</i> <sub>6</sub> ..... | 37 |
| Figure S4f ROESY spectrum of 3 in DMSO- <i>d</i> <sub>6</sub> .....                               | 38 |
| Figure S5a <sup>1</sup> H NMR spectrum of 4 in DMSO- <i>d</i> <sub>6</sub> .....                  | 39 |
| Figure S5b <sup>13</sup> C NMR spectrum of 4 in DMSO- <i>d</i> <sub>6</sub> .....                 | 40 |
| Figure S5c HSQC spectrum of 4 in DMSO- <i>d</i> <sub>6</sub> .....                                | 41 |
| Figure S5d HMBC spectrum of 4 in DMSO- <i>d</i> <sub>6</sub> .....                                | 42 |
| Figure S5e <sup>1</sup> H- <sup>1</sup> H COSY spectrum of 4 in DMSO- <i>d</i> <sub>6</sub> ..... | 43 |
| Figure S5f ROESY spectrum of 4 in DMSO- <i>d</i> <sub>6</sub> .....                               | 44 |
| Figure S6a <sup>1</sup> H NMR spectrum of 5 in DMSO- <i>d</i> <sub>6</sub> .....                  | 45 |
| Figure S6b <sup>13</sup> C NMR spectrum of 5 in DMSO- <i>d</i> <sub>6</sub> .....                 | 46 |
| Figure S6c HSQC spectrum of 5 in DMSO- <i>d</i> <sub>6</sub> .....                                | 47 |
| Figure S6d HMBC spectrum of 5 in DMSO- <i>d</i> <sub>6</sub> .....                                | 48 |

|                                                                                                                                                                       |    |
|-----------------------------------------------------------------------------------------------------------------------------------------------------------------------|----|
| Figure S6e $^1\text{H}$ - $^1\text{H}$ COSY spectrum of 5 in DMSO- $d_6$ .....                                                                                        | 49 |
| Figure S6f ROESY spectrum of 5 in DMSO- $d_6$ .....                                                                                                                   | 50 |
| Figure S7a $^1\text{H}$ NMR spectrum of 6 in DMSO- $d_6$ .....                                                                                                        | 51 |
| Figure S7b $^{13}\text{C}$ NMR spectrum of 6 in DMSO- $d_6$ .....                                                                                                     | 52 |
| Figure S7c HSQC spectrum of 6 in DMSO- $d_6$ .....                                                                                                                    | 53 |
| Figure S7d HMBC spectrum of 6 in DMSO- $d_6$ .....                                                                                                                    | 54 |
| Figure S7e $^1\text{H}$ - $^1\text{H}$ COSY spectrum of 6 in DMSO- $d_6$ .....                                                                                        | 55 |
| Figure S7f ROESY spectrum of 6 in DMSO- $d_6$ .....                                                                                                                   | 56 |
| Figure S7g HETLOC spectrum of 6 in DMSO- $d_6$ .....                                                                                                                  | 57 |
| Figure S8a $^1\text{H}$ NMR spectrum of 7 in DMSO- $d_6$ .....                                                                                                        | 58 |
| Figure S8b $^{13}\text{C}$ NMR spectrum of 7 in DMSO- $d_6$ .....                                                                                                     | 59 |
| Figure S8c HSQC spectrum of 7 in DMSO- $d_6$ .....                                                                                                                    | 60 |
| Figure S8d HMBC spectrum of 7 in DMSO- $d_6$ .....                                                                                                                    | 61 |
| Figure S8e $^1\text{H}$ - $^1\text{H}$ COSY spectrum of 7 in DMSO- $d_6$ .....                                                                                        | 62 |
| Figure S8f ROESY spectrum of 7 in DMSO- $d_6$ .....                                                                                                                   | 63 |
| Figure S8g HETLOC spectrum of 7 in DMSO- $d_6$ .....                                                                                                                  | 64 |
| Figure S9a $^1\text{H}$ NMR spectrum of 8 in DMSO- $d_6$ .....                                                                                                        | 65 |
| Figure S9b $^{13}\text{C}$ NMR spectrum of 8 in DMSO- $d_6$ .....                                                                                                     | 66 |
| Figure S9c HSQC spectrum of 8 in DMSO- $d_6$ .....                                                                                                                    | 67 |
| Figure S9d HMBC spectrum of 8 in DMSO- $d_6$ .....                                                                                                                    | 68 |
| Figure S9e $^1\text{H}$ - $^1\text{H}$ COSY spectrum of 8 in DMSO- $d_6$ .....                                                                                        | 69 |
| Figure S9f ROESY spectrum of 8 in DMSO- $d_6$ .....                                                                                                                   | 70 |
| Figure S9g HETLOC spectrum of 8 in DMSO- $d_6$ .....                                                                                                                  | 71 |
| Figure S10 $^1\text{H}$ NMR spectrum of 9 in DMSO- $d_6$ .....                                                                                                        | 72 |
| Figure S11 $^1\text{H}$ NMR spectrum of 10 in DMSO- $d_6$ .....                                                                                                       | 73 |
| Figure S12 Relative Stereochemical Analysis of NATs .....                                                                                                             | 74 |
| Figure S13 LC-MS chromatogram of extracted ion at 333 $[\text{M} - \text{H}]^-$ and 347 $[\text{M} - \text{H}]^-$ from Mosher's esterification reaction of 6-10 ..... | 75 |
| Figure S14 LC-MS chromatogram of extracted ion at 437 $[\text{M} + \text{H}]^+$ from Mosher's esterification reaction of 6-10 .....                                   | 76 |
| Figure S15 LC-MS chromatogram of extracted ion at 412 $[\text{M} - \text{H}]^-$ from FDLA 6-10 .....                                                                  | 77 |

**Table S1. HRESIMS data of the compounds 1-10**

| <b>Compounds</b>           | <b>formula</b>                                                                | <b>det. <i>m/z</i></b> | <b>calc. <i>m/z</i></b> | <b><math>\Delta</math><br/>Error<br/>(ppm)</b> |
|----------------------------|-------------------------------------------------------------------------------|------------------------|-------------------------|------------------------------------------------|
| <b>Neoantimycin L (1)</b>  | H <sup>+</sup> C <sub>37</sub> H <sub>46</sub> N <sub>2</sub> O <sub>12</sub> | 711.3106               | 711.3129                | 3.23                                           |
| <b>Unantimycin B1 (2)</b>  | H <sup>+</sup> C <sub>35</sub> H <sub>43</sub> NO <sub>11</sub>               | 654.2924               | 654.2914                | 1.53                                           |
| <b>Unantimycin B2 (3)</b>  | H <sup>+</sup> C <sub>35</sub> H <sub>43</sub> NO <sub>11</sub>               | 654.2925               | 654.2914                | 1.68                                           |
| <b>Unantimycin D1 (4)</b>  | H <sup>+</sup> C <sub>34</sub> H <sub>41</sub> NO <sub>11</sub>               | 640.2747               | 640.2758                | 1.72                                           |
| <b>Unantimycin D2 (5)</b>  | H <sup>+</sup> C <sub>34</sub> H <sub>41</sub> NO <sub>11</sub>               | 640.2743               | 640.2758                | 2.34                                           |
| <b>Neoantimycin G (6)</b>  | H <sup>+</sup> C <sub>37</sub> H <sub>48</sub> N <sub>2</sub> O <sub>12</sub> | 713.3262               | 713.3286                | 3.36                                           |
| <b>Unantimycin C1 (7)</b>  | H <sup>+</sup> C <sub>35</sub> H <sub>45</sub> NO <sub>11</sub>               | 656.3067               | 656.3071                | 0.63                                           |
| <b>Unantimycin C2 (8)</b>  | H <sup>+</sup> C <sub>35</sub> H <sub>45</sub> NO <sub>11</sub>               | 656.3069               | 656.3071                | 0.24                                           |
| <b>Unantimycin E1 (9)</b>  | H <sup>+</sup> C <sub>34</sub> H <sub>43</sub> NO <sub>11</sub>               | 642.2906               | 642.2914                | 1.25                                           |
| <b>Unantimycin E2 (10)</b> | H <sup>+</sup> C <sub>34</sub> H <sub>43</sub> NO <sub>11</sub>               | 642.2905               | 642.2914                | 1.40                                           |

**Table S2. NMR (600 MHz, DMSO-*d*<sub>6</sub>) data for Neoantimycin L (1)**

|       | $\delta_C$        | $\delta_H$                                   | HMBC              | COSY      | ROESY     |
|-------|-------------------|----------------------------------------------|-------------------|-----------|-----------|
| 1     | 202.6             |                                              |                   |           |           |
| 2     | 76.7              | 5.67, dd (7.6, 5.6)                          | 1, 3, 12, 13      | 12a, 12b  | 14/18, 33 |
| 3     | 167.0             |                                              |                   |           |           |
| 4     | 75.4              | 5.10, d (5.2)                                | 3, 5, 19, 20, 21  | 19        | 20, 21    |
| 5     | 168.0             |                                              |                   |           |           |
| 6     | 55.4              | 5.04, br s                                   |                   |           | 29        |
| 7     | 70.8              | 5.59, m                                      | 5, 8              | 6, 29     |           |
| 8     | 167.7             |                                              |                   |           |           |
| 9     | 75.6              | 4.83, d (7.6)                                | 8, 10, 30, 31, 32 | 30        | 31, 32    |
| 10    | 170.9             |                                              |                   |           |           |
| 11    | 54.1              |                                              |                   |           |           |
| 12    | 37.1              | 3.16, dd (14.2, 5.6)<br>3.07, dd (14.2, 7.7) | 1, 2, 13, 14/18   | 2         | 14/18     |
| 13    | 135.4             |                                              |                   |           |           |
| 14/18 | 129.6             | 7.20, overlapped                             | 12, 16            | 15/17     | 2, 12, 34 |
| 15/17 | 128.3             | 7.30, t (7.5)                                | 13                | 14/18, 16 |           |
| 16    | 126.9             | 7.25, overlapped                             |                   | 15/17     |           |
| 19    | 36.4              | 1.79, m                                      | 3, 4, 20, 21      | 4, 20, 21 |           |
| 20    | 14.2              | 0.77, overlapped                             | 4, 19, 21         | 19        | 4         |
| 21    | 23.7              | 1.03, m                                      | 19, 20            | 19, 35    | 4         |
| 22    | 169.6             |                                              |                   |           |           |
| 23    | 114.8             |                                              |                   |           |           |
| 24    | n.o. <sup>a</sup> |                                              |                   |           |           |
| 25    | 128.3             |                                              |                   |           |           |
| 26    | n.o. <sup>a</sup> | 8.14, m                                      | 28                | 27        |           |
| 27    | n.o. <sup>a</sup> | 6.57, br s                                   |                   | 26, 28    |           |
| 28    | 123.6             | 7.69, br s                                   |                   | 27        |           |
| 29    | 15.7              | 1.23, d (6.6)                                | 6, 7              | 7         | 6, 36     |
| 30    | 35.7              | 1.88, m                                      |                   | 9, 31, 32 |           |
| 31    | 14.1              | 0.86, d (7.8)                                | 9, 30, 32         | 30        |           |
| 32    | 24.0              | 1.43, m<br>1.14, m                           | 9, 30             | 30, 36    |           |
| 33    | 21.3              | 1.34, s                                      | 1, 10, 11, 34     |           | 2         |
| 34    | 21.2              | 1.21, s                                      | 1, 10, 11, 33     |           |           |
| 35    | 11.1              | 0.77 overlapped                              | 19, 21            | 21        |           |
| 36    | 10.5              | 0.84, t (7.6)                                | 30, 32            | 32        | 29        |
| 25-NH |                   | 9.70 br s                                    |                   | CHO       |           |
| CHO   | 159.8             | 8.31, d (2.0)                                |                   | 25-NH     |           |

<sup>a</sup> Carbon resonances are not observed due to signal broadening

**Table S3. NMR (600 MHz, DMSO-*d*<sub>6</sub>) data for Unantimycin B1 (2)**

|       | $\delta_C$ | $\delta_H$           | HMBC              | COSY      | ROESY              |
|-------|------------|----------------------|-------------------|-----------|--------------------|
| 1     | 202.4      |                      |                   |           |                    |
| 2     | 76.4       | 5.40, dd (10.0, 2.6) | 3, 12, 13         | 12a, 12b  | 14/18, 33          |
| 3     | 168.09     |                      |                   |           |                    |
| 4     | 75.5       | 5.02, d (3.0)        | 3, 5, 19, 20, 21  | 19        | 20, 21             |
| 5     | 168.5      |                      |                   |           |                    |
| 6     | 55.4       | 5.16, dd (9.2, 2.9)  | 5, 7, 22          | 7, 6-NH   | 29                 |
| 7     | 70.3       | 5.67, qd (6.4, 3.0)  | 5, 8, 29          | 6, 29     | 6-NH               |
| 8     | 167.7      |                      |                   |           |                    |
| 9     | 75.5       | 5.21, d (8.2)        | 8, 10, 30, 31, 32 | 30        | 31, 32             |
| 10    | 170.8      |                      |                   |           |                    |
| 11    | 55.0       |                      |                   |           |                    |
| 12    | 36.6       | 3.16, m<br>2.92, m   | 1, 2, 13, 14/18   | 2         | 33, 14/18<br>14/18 |
| 13    | 136.2      |                      |                   |           |                    |
| 14/18 | 129.2      | 7.28, overlapped     | 12, 16            | 15/17     | 2, 12              |
| 15/17 | 128.5      | 7.33, overlapped     | 13                | 14/18, 16 |                    |
| 16    | 126.9      | 7.25, m              | 14/18             | 15/17     |                    |
| 19    | 29.7       | 2.24, m              | 3, 4, 20, 21      | 4, 20, 21 |                    |
| 20    | 16.1       | 0.79, d (6.9)        | 4, 19, 21         | 19        |                    |
| 21    | 18.3       | 0.91, d (6.9)        | 4, 19, 20         | 19        |                    |
| 22    | 167.9      |                      |                   |           |                    |
| 23    | 135.2      |                      |                   |           |                    |
| 24    | 114.8      | 7.28, overlapped     | 26, 28            |           |                    |
| 25    | 157.2      |                      |                   |           |                    |
| 26    | 118.5      | 6.94, dd (8.1, 2.4)  | 24, 28            | 27        |                    |
| 27    | 129.2      | 7.28, overlapped     | 23, 25            | 26, 28    |                    |
| 28    | 118.5      | 7.35, overlapped     | 22, 24, 26        | 27        |                    |
| 29    | 16.1       | 1.21, d (6.5)        | 6, 7              | 7         | 35                 |
| 30    | 36.7       | 1.81, m              | 8, 9, 31, 32      | 31, 32    |                    |
| 31    | 13.8       | 0.87, d (6.8)        | 9, 30, 32         | 30        |                    |
| 32    | 24.0       | 1.45, m<br>1.06, m   | 9, 30, 31         | 30        |                    |
| 33    | 21.3       | 1.41, s              | 1, 10, 11, 34     |           | 2, 12a             |
| 34    | 20.7       | 1.32, s              | 1, 10, 11, 33     |           |                    |
| 35    | 10.6       | 0.87, t (6.8)        | 30, 32            |           |                    |
| 6-NH  |            | 8.72, d (9.2)        | 5, 7, 22          | 6         |                    |
| 25-OH |            | 9.66, s              |                   |           |                    |

**Table S4. NMR (600 MHz, DMSO-*d*<sub>6</sub>) data for Unantimycin B2 (3)**

|       | $\delta_C$ | $\delta_H$                                   | HMBC            | COSY      | ROESY        |
|-------|------------|----------------------------------------------|-----------------|-----------|--------------|
| 1     | 202.6      |                                              |                 |           |              |
| 2     | 76.4       | 5.68, dd (7.7, 5.6)                          | 1, 3, 12, 13    | 12        | 14/18,<br>33 |
| 3     | 167.2      |                                              |                 |           |              |
| 4     | 75.9       | 5.05, d (5.4)                                | 3, 19, 20, 21   | 19        | 20, 21       |
| 5     | 168.2      |                                              |                 |           |              |
| 6     | 55.9       | 4.95, dd (8.4, 3.1)                          | 5               | 7, 6-NH   | 29           |
| 7     | 70.6       | 5.55, m                                      | 5, 8            | 6, 29     |              |
| 8     | 167.7      |                                              |                 |           |              |
| 9     | 75.6       | 4.86, d (7.7)                                | 10, 30, 31, 32  | 30        | 31, 32       |
| 10    | 171.0      |                                              |                 |           |              |
| 11    | 54.2       |                                              |                 |           |              |
| 12    | 37.1       | 3.16, dd (14.1, 7.8)<br>3.06, dd (14.1, 7.8) | 1, 2, 13, 14/18 | 2         | 33, 34<br>34 |
| 13    | 135.4      |                                              |                 |           |              |
| 14/18 | 129.6      | 7.20, overlapped                             | 12, 16          | 15/17     | 2, 12        |
| 15/17 | 128.4      | 7.28, overlapped                             | 13              | 14/18, 16 |              |
| 16    | 127.0      | 7.25, m                                      | 14/18           | 15/17     |              |
| 19    | 30.0       | 2.01, m                                      | 3, 4, 20, 21    | 4, 20, 21 |              |
| 20    | 16.8       | 0.69, d (6.8)                                | 4, 19, 21       | 19        | 4            |
| 21    | 17.9       | 0.83, overlapped                             | 4, 19, 20       | 19        | 4            |
| 22    | 167.8      |                                              |                 |           |              |
| 23    | 135.0      |                                              |                 |           |              |
| 24    | 114.7      | 7.28, overlapped                             | 26, 28          |           |              |
| 25    | 157.2      |                                              |                 |           |              |
| 26    | 118.5      | 6.95, dd (7.6, 1.8)                          | 24, 28          | 27        |              |
| 27    | 129.2      | 7.28, overlapped                             | 23, 25          | 26, 28    |              |
| 28    | 118.5      | 7.34, br d (7.8)                             | 22, 24, 26      | 27        |              |
| 29    | 15.6       | 1.23, d (6.3)                                | 6, 7            | 7         | 6, 31        |
| 30    | 35.7       | 1.88, qd (7.6, 3.6)                          |                 | 9, 31     |              |
| 31    | 14.0       | 0.86, d (6.9)                                | 9, 30, 32       | 30        |              |
| 32    | 24.0       | 1.43, m<br>1.13, m                           | 9, 30, 31, 35   | 30, 35    |              |
| 33    | 21.1       | 1.34, s                                      | 1, 10, 11, 34   |           |              |
| 34    | 21.3       | 1.20, s                                      | 1, 10, 11, 33   |           |              |
| 35    | 10.4       | 0.83, overlapped                             | 32, 30          | 32        |              |
| 6-NH  |            | 8.67, d (8.3)                                | 22              | 6         |              |
| 25-OH |            | 9.68, s                                      |                 |           |              |

**Table S5. NMR (600 MHz, DMSO-*d*<sub>6</sub>) data for Unantimycin D1 (4)**

|       | $\delta_c$        | $\delta_H$                                   | HMBC              | COSY      | ROESY              |
|-------|-------------------|----------------------------------------------|-------------------|-----------|--------------------|
| 1     | 202.5             |                                              |                   |           |                    |
| 2     | 76.4              | 5.37, dd (10.0, 2.6)                         | 1, 3, 12, 13      | 12a, 12b  | 14/18, 33          |
| 3     | 168.1             |                                              |                   |           |                    |
| 4     | 75.5              | 5.01, d (2.9)                                | 3, 5, 19, 20, 21  | 19        | 20, 21             |
| 5     | 168.6             |                                              |                   |           |                    |
| 6     | 55.4              | 5.15, overlapped                             | 5, 7, 22, 29      | 7, 6-NH   | 29                 |
| 7     | 70.2              | 5.66, qd (6.4, 4.0)                          | 5, 8, 29          | 6, 29     | 6-NH               |
| 8     | 167.7             |                                              |                   |           |                    |
| 9     | 76.8              | 5.15, overlapped                             | 8, 10, 30, 31, 32 | 30        | 31, 32             |
| 10    | 170.9             |                                              |                   |           |                    |
| 11    | 55.2              |                                              |                   |           |                    |
| 12    | 36.6              | 3.15, dd (14.9, 2.7)<br>2.91, dd (14.9, 2.7) | 1, 2, 13, 14/18   | 2         | 33, 14/18<br>14/18 |
| 13    | 136.3             |                                              |                   |           |                    |
| 14/18 | 129.3             | 7.28, overlapped                             | 12, 16            | 15/17     | 2, 12              |
| 15/17 | 128.6             | 7.34, overlapped                             | 13                | 14/18, 16 |                    |
| 16    | 127.0             | 7.25, m                                      | 14/18             | 15/17     |                    |
| 19    | 29.7              | 2.25, m                                      | 3, 4, 20, 21      | 4, 20, 21 |                    |
| 20    | 16.1              | 0.80, d (6.9)                                | 4, 19, 21         | 19        |                    |
| 21    | 18.3 <sup>a</sup> | 0.92, d (6.9)                                | 4, 19, 20         | 19        |                    |
| 22    | 168.0             |                                              |                   |           |                    |
| 23    | 135.2             |                                              |                   |           |                    |
| 24    | 114.8             | 7.28, overlapped                             | 25, 26, 28        |           |                    |
| 25    | 157.2             |                                              |                   |           |                    |
| 26    | 118.5             | 6.94, ddd (8.0, 2.5,<br>1.1)                 | 24, 25, 28        | 27        |                    |
| 27    | 129.3             | 7.28, overlapped                             | 23, 25            | 26, 28    |                    |
| 28    | 118.5             | 7.35, overlapped                             | 22, 24, 26        | 27        |                    |
| 29    | 16.2              | 1.21, d (6.4)                                | 6, 7              | 7         |                    |
| 30    | 30.7              | 1.99, m                                      | 8, 9, 31, 32      | 9, 31, 32 |                    |
| 31    | 17.6 <sup>a</sup> | 0.88, d (8.4)                                | 9, 30, 32         | 30        |                    |
| 32    | 18.0 <sup>a</sup> | 0.90, d (8.4)                                | 9, 30, 31         | 30        |                    |
| 33    | 21.3              | 1.43, s                                      | 1, 10, 11, 34     |           | 2, 12a             |
| 34    | 20.6              | 1.33, s                                      | 1, 10, 11, 33     |           |                    |
| 6-NH  |                   | 8.70, d (9.2)                                | 5, 7, 22          | 6         |                    |
| 25-OH |                   | 9.70, s                                      |                   |           |                    |

<sup>a</sup> values are interchangeable



**Table S6. NMR (600 MHz, DMSO-*d*<sub>6</sub>) data for Unantimycin D2 (5)**

|       | $\delta_c$        | $\delta_H$                                   | HMBC              | COSY      | ROESY          |
|-------|-------------------|----------------------------------------------|-------------------|-----------|----------------|
| 1     | 202.6             |                                              |                   |           |                |
| 2     | 76.4              | 5.69, dd (7.8, 5.6)                          | 1, 3, 12, 13      | 12a, 12b  | 14/18, 33      |
| 3     | 167.2             |                                              |                   |           |                |
| 4     | 76.0              | 5.05, d (5.3)                                | 3, 5, 19, 20, 21  | 19        | 20, 21         |
| 5     | 168.3             |                                              |                   |           |                |
| 6     | 55.9              | 4.94, dd (8.3, 3.1)                          | 5, 7, 22          | 7, 6-NH   | 29             |
| 7     | 70.6              | 5.54, qd (6.4, 3.0)                          | 5, 8              | 6, 29     | 6-NH           |
| 8     | 167.8             |                                              |                   |           |                |
| 9     | 76.7              | 4.80, d (7.2)                                | 8, 10, 30, 31, 32 | 30        | 31, 32         |
| 10    | 171.0             |                                              |                   |           |                |
| 11    | 54.2              |                                              |                   |           |                |
| 12    | 37.2              | 3.15, dd (14.1, 5.6)<br>3.06, dd (14.0, 7.8) | 1, 2, 13, 14/18   | 2         | 14/18<br>14/18 |
| 13    | 135.4             |                                              |                   |           |                |
| 14/18 | 129.6             | 7.20, m                                      | 12, 16            | 15/17     | 2, 12          |
| 15/17 | 128.4             | 7.28, overlapped                             | 13                | 14/18, 16 |                |
| 16    | 127.0             | 7.25, m                                      | 14/18             | 15/17     |                |
| 19    | 30.0              | 2.03, overlapped                             | 3, 4, 20, 21      | 4, 20, 21 |                |
| 20    | 16.8              | 0.69, d (6.8)                                | 4, 19, 21         | 19        |                |
| 21    | 17.6 <sup>a</sup> | 0.82, d (6.9)                                | 4, 19, 20         | 19        |                |
| 22    | 167.6             |                                              |                   |           |                |
| 23    | 135.0             |                                              |                   |           |                |
| 24    | 114.8             | 7.28, overlapped                             | 26, 28            |           |                |
| 25    | 157.3             |                                              |                   |           |                |
| 26    | 118.6             | 6.95, ddd (8.0, 2.6, 1.1)                    | 24, 28            | 27        |                |
| 27    | 129.3             | 7.28, overlapped                             | 23, 25            | 26, 28    |                |
| 28    | 118.5             | 7.34, m                                      | 22, 24, 26        | 27        |                |
| 29    | 15.7              | 1.23, d (6.5)                                | 6, 7              | 7         |                |
| 30    | 29.8              | 2.03, overlapped                             | 8, 9, 31, 32      | 9, 31, 32 |                |
| 31    | 17.7 <sup>a</sup> | 0.88, dd (6.8, 2.6)                          | 9, 30, 32         | 30        |                |
| 32    | 17.9 <sup>a</sup> | 0.88, dd (6.8, 2.6)                          | 9, 30, 31         | 30        |                |
| 33    | 21.3              | 1.34, s                                      | 1, 10, 11, 34     |           | 2              |
| 34    | 21.2              | 1.21, s                                      | 1, 10, 11, 33     |           | 12             |
| 6-NH  |                   | 8.65, d (8.3)                                | 5, 7, 22          | 6         |                |
| 25-OH |                   | 9.76, br s                                   |                   |           |                |

**Table S7a. NMR (600 MHz, DMSO-*d*<sub>6</sub>) data for NAT-G (6)**

|       | $\delta_C$        | $\delta_H$                                    | HMBC              | COSY      | ROESY             |
|-------|-------------------|-----------------------------------------------|-------------------|-----------|-------------------|
| 1     | 77.8              | 3.29, d (10.5)                                | 10, 11, 12, 33    | 1-OH      | 2, 12b,<br>33, 34 |
| 2     | 71.6              | 5.45, dd (10.2, 4.6)                          | 1, 3, 12, 13      | 12        | 12b,<br>14/18, 34 |
| 3     | 167.6             |                                               |                   |           |                   |
| 4     | 75.7              | 5.34, d (3.7)                                 | 3, 5, 19, 20, 21  | 19        | 20, 21            |
| 5     | 167.6             |                                               |                   |           |                   |
| 6     | 55.3              | 5.14, dd (8.7, 3.3)                           |                   | 7         | 29                |
| 7     | 70.7              | 5.56, m                                       | 5, 22             | 6, 29     |                   |
| 8     | 168.1             |                                               |                   |           |                   |
| 9     | 74.6              | 4.57, d (8.3)                                 | 8, 10, 30, 31, 32 | 30        | 31, 32            |
| 10    | 174.8             |                                               |                   |           |                   |
| 11    | 45.4              |                                               |                   |           |                   |
| 12    | 39.2              | 3.04, dd (14.2, 10.2)<br>2.97, dd (14.2, 4.6) | 1, 2, 13, 14/18   | 2         | 14/18<br>1, 14/18 |
| 13    | 137.5             |                                               |                   |           |                   |
| 14/18 | 129.0             | 7.22, overlapped                              | 12, 16            | 15/17     | 2, 12             |
| 15/17 | 128.3             | 7.28, m                                       | 13                | 14/18, 16 |                   |
| 16    | 126.4             | 7.20, overlapped                              | 14/18             | 15/17     |                   |
| 19    | 36.6              | 1.50, m                                       | 3, 4, 20, 21      | 4, 20, 21 |                   |
| 20    | 14.4              | 0.60, overlapped                              | 4, 19, 21         | 19        |                   |
| 21    | 22.9              | 0.8, m                                        | 19, 20            | 19, 35    |                   |
| 22    | 170.0             |                                               |                   |           |                   |
| 23    | 114.7             |                                               |                   |           |                   |
| 24    | n.o. <sup>a</sup> |                                               |                   |           |                   |
| 25    | 127.4             |                                               |                   |           |                   |
| 26    | n.o. <sup>a</sup> | 8.19, d (7.8)                                 | 24, 28            | 27        |                   |
| 27    | n.o. <sup>a</sup> | 6.81, br s                                    |                   | 26, 28    |                   |
| 28    | 123.6             | 7.87, d (7.2)                                 |                   | 27        |                   |
| 29    | 15.6              | 1.21, d (6.4)                                 | 6, 7              | 7         | 6, 36             |
| 30    | 35.4              | 1.85, m                                       |                   | 9, 31, 32 |                   |
| 31    | 14.0              | 0.87, d (7.1)                                 | 9, 30, 32         | 30        |                   |
| 32    | 24.3              | 1.50, m<br>1.17, m                            | 9, 31             | 30, 36    |                   |
| 33    | 26.2              | 1.31, s                                       | 1, 10, 11, 34     |           | 1-OH              |
| 34    | 22.0              | 1.25, s                                       | 1, 10, 11, 33     |           | 1, 2              |
| 35    | 11.1              | 0.60 overlapped                               | 19, 21            | 21        |                   |
| 36    | 10.3              | 0.84, d (7.6)                                 | 30, 32            | 32        | 29                |
| CHO   | 159.8             | 8.32, d (1.7)                                 |                   | 25-NH     |                   |
| 1-OH  |                   | 4.39, d (10.4)                                |                   | 1         |                   |

| $\delta_C$ | $\delta_H$ | HMBC | COSY | ROESY |
|------------|------------|------|------|-------|
| 24-OH      | 12.7, s    |      |      |       |
| 25-NH      | 9.78 br s  |      | CHO  |       |

<sup>a</sup> Carbon resonances are not observed due to signal broadening

**Table S7b. NMR (600 MHz, DMSO-*d*<sub>6</sub>) data for NAT-G (6)**

|       | Experimental<br>$\delta_C$ (125 MHz) | Literature <sup>a</sup><br>$\delta_C$ (100 MHz) | Experimental<br>$\delta_H$ (600 MHz)          | Literature <sup>a</sup><br>$\delta_H$ (400 MHz)  |
|-------|--------------------------------------|-------------------------------------------------|-----------------------------------------------|--------------------------------------------------|
| 1     | 77.8                                 | 77.9                                            | 3.29, d (10.5)                                | 3.28, d (10.4)                                   |
| 2     | 71.6                                 | 71.6                                            | 5.45, dd (10.2, 4.6)                          | 5.44, dd (10.2, 4.5)                             |
| 3     | 167.6                                | 167.6                                           |                                               |                                                  |
| 4     | 75.7                                 | 75.8                                            | 5.34, d (3.7)                                 | 5.33, d (3.6)                                    |
| 5     | 167.6                                | 167.5                                           |                                               |                                                  |
| 6     | 55.3                                 | 55.3                                            | 5.14, dd (8.7, 3.3)                           | 5.15, dd (8.7, 3.1)                              |
| 7     | 70.7                                 | 70.6                                            | 5.56, m                                       | 5.55, qd (6.5, 3.1)                              |
| 8     | 168.1                                | 168.1                                           |                                               |                                                  |
| 9     | 74.6                                 | 74.6                                            | 4.57, d (8.3)                                 | 4.56, d (8.3)                                    |
| 10    | 174.8                                | 174.8                                           |                                               |                                                  |
| 11    | 45.4                                 | 45.4                                            |                                               |                                                  |
| 12    | 39.2                                 | 39.2                                            | 3.04, dd (14.2, 10.2)<br>2.97, dd (14.2, 4.6) | 3.03, dd (14.2,<br>10.2)<br>2.95, dd (14.2, 4.5) |
| 13    | 137.5                                | 137.6                                           |                                               |                                                  |
| 14/18 | 129.0                                | 129.0                                           | 7.22, overlapped                              | 7.22, d (7.5)                                    |
| 15/17 | 128.3                                | 128.3                                           | 7.28, m                                       | 7.27, dd (7.3, 7.5)                              |
| 16    | 126.4                                | 126.4                                           | 7.20, overlapped                              | 7.19, t (7.3)                                    |
| 19    | 36.6                                 | 36.6                                            | 1.50, m                                       | 1.50, m                                          |
| 20    | 14.4                                 | 14.3                                            | 0.60, overlapped                              | 0.58, d (6.8)                                    |
| 21    | 22.9                                 | 22.9                                            | 0.8, m                                        | 0.80, m                                          |
| 22    | 170.0                                | 170.2                                           |                                               |                                                  |
| 23    | 114.7                                | 114.5                                           |                                               |                                                  |
| 24    | n.o. <sup>b</sup>                    | 150.7                                           |                                               |                                                  |
| 25    | 127.4                                | 127.1                                           |                                               |                                                  |
| 26    | n.o. <sup>b</sup>                    | 125.0                                           | 8.19, d (7.8)                                 | 8.20, d (7.7)                                    |
| 27    | n.o. <sup>b</sup>                    | n.o. <sup>b</sup>                               | 6.81, br s                                    | 6.90, br s                                       |
| 28    | 123.6                                | 123.6                                           | 7.87, d (7.2)                                 | 7.92, br s                                       |
| 29    | 15.6                                 | 15.5                                            | 1.21, d (6.4)                                 | 1.20, d (6.5)                                    |
| 30    | 35.4                                 | 35.4                                            | 1.85, m                                       | 1.84, dqd (8.3, 7.0,<br>3.6)                     |
| 31    | 14.0                                 | 14.0                                            | 0.87, d (7.1)                                 | 0.86, d (7.0)                                    |
| 32    | 24.3                                 | 24.3                                            | 1.50, m<br>1.17, m                            | 1.49, m<br>1.17, m                               |
| 33    | 26.2                                 | 26.2                                            | 1.31, s                                       | 1.30, s                                          |
| 34    | 22.0                                 | 22.0                                            | 1.25, s                                       | 1.25, s                                          |
| 35    | 11.1                                 | 11.1                                            | 0.60 overlapped                               | 0.59, t (6.8)                                    |
| 36    | 10.3                                 | 10.2                                            | 0.84, d (7.6)                                 | 0.84, dd (7.5, 7.5)                              |
| CHO   | 159.8                                | 160.4                                           | 8.32, d (1.7)                                 | 8.31, d (1.8)                                    |

|       |                |                |
|-------|----------------|----------------|
| 1-OH  | 4.39, d (10.4) | 4.39, d (10.4) |
| 24-OH | 12.7, s        | 12.8, br s     |
| 25-NH | 9.78 br s      | 9.81, br s     |

---

<sup>a</sup> Salim, A. A. *et al. Org. Lett.* **2014**, *16* (19), 5036–5039.

**Table S8. NMR (600 MHz, DMSO-*d*<sub>6</sub>) data for Unantimycin C1 (7)**

|       | $\delta_C$         | $\delta_H$                                   | HMBC                  | COSY         | ROESY            |
|-------|--------------------|----------------------------------------------|-----------------------|--------------|------------------|
| 1     | 75.8               | 3.48, overlapped                             | 10, 11, 12, 33,<br>34 | 1-OH         | 33, 34           |
| 2     | 76.7               | 5.42, t (7.0)                                | 3, 12, 13             | 12a, 12b     | 14/18, 33,<br>34 |
| 3     | 168.4 <sup>a</sup> |                                              |                       |              |                  |
| 4     | 76.9               | 5.17, d (4.6)                                | 3, 5, 19, 20, 21      | 19           | 20, 21           |
| 5     | 168.5 <sup>a</sup> |                                              |                       |              |                  |
| 6     | 55.9               | 5.15, dd (9.0, 3.1)                          | 5, 7, 22              | 7, 6-NH      | 29               |
| 7     | 70.7               | 5.80, qd (6.4, 2.9)                          | 8                     | 6, 29        | 6-NH             |
| 8     | 170.4              |                                              |                       |              |                  |
| 9     | 74.9               | 5.01, d (7.9)                                | 8, 10, 30, 31,<br>32  | 30           | 31, 32           |
| 10    | 174.2              |                                              |                       |              |                  |
| 11    | 45.4               |                                              |                       |              |                  |
| 12    | 37.3               | 3.04, dd (13.6, 5.7)<br>2.90, dd (13.7, 8.3) | 1, 2, 13, 14/18       | 2            | 33, 14/18        |
| 13    | 137.4              |                                              |                       |              |                  |
| 14/18 | 129.3              | 7.29, overlapped                             | 12, 16                | 15/17        | 2, 12            |
| 15/17 | 128.4              | 7.29, overlapped                             | 13                    | 14/18, 16    |                  |
| 16    | 126.4              | 7.20, overlapped                             | 14/18                 | 15/17        |                  |
| 19    | 31.5               | 1.99, overlapped                             |                       | 4, 20, 21    |                  |
| 20    | 17.0               | 0.67, d (7.0)                                | 4, 19, 21             | 19           |                  |
| 21    | 18.2               | 0.67, d (7.0)                                | 4, 19, 20             | 19           |                  |
| 22    | 167.6              |                                              |                       |              |                  |
| 23    | 135.1              |                                              |                       |              |                  |
| 24    | 114.7              | 7.29, overlapped                             | 22, 26, 28            |              |                  |
| 25    | 157.3              |                                              |                       |              |                  |
| 26    | 118.4 <sup>a</sup> | 6.96, dd (8.1, 2.4)                          | 24, 28                | 27           |                  |
| 27    | 128.0              | 7.29, overlapped                             | 23, 25                | 26, 28       |                  |
| 28    | 118.6 <sup>a</sup> | 7.36, d (7.7)                                | 22, 24, 26            | 27           |                  |
| 29    | 15.9               | 1.28, d (6.4)                                | 6, 7                  | 7            | 35, 6-NH         |
| 30    | 35.8               | 1.93, overlapped                             | 31, 32, 35            | 31, 32       |                  |
| 31    | 14.7               | 0.92, d (6.9)                                | 9, 30, 32             | 30           |                  |
| 32    | 24.1               | 1.49, m<br>1.19, m                           | 30, 31, 35            | 35<br>30, 35 |                  |
| 33    | 23.7               | 1.10, s                                      | 1, 10, 11, 34         |              | 2                |
| 34    | 22.6               | 1.32, s                                      | 1, 10, 11, 33         |              | 2, 12            |
| 35    | 10.9               | 0.88, t (7.3)                                | 30, 32                | 32           |                  |
| 1-OH  |                    | 4.85, br d (10.3)                            | 1                     | 1            |                  |
| 6-NH  |                    | 8.77, d (8.9)                                | 22                    | 6            | 28, 29           |

<sup>a</sup> values are interchangeable

**Table S9. NMR (600 MHz, DMSO-*d*<sub>6</sub>) data for Unantimycin C2 (8)**

|       | $\delta_C$ | $\delta_H$                                    | HMBC                  | COSY      | ROESY        |
|-------|------------|-----------------------------------------------|-----------------------|-----------|--------------|
| 1     | 77.9       | 3.29, d (10.6)                                | 10, 11, 12,<br>33, 34 | 1-OH      | 12b, 34      |
| 2     | 71.8       | 5.38, dd (10.4, 4.4)                          | 3, 12                 | 12        | 14/18,<br>34 |
| 3     | 168.1      |                                               |                       |           |              |
| 4     | 75.4       | 5.29, d (3.4)                                 | 3, 5, 19, 20,<br>21   | 19        | 20, 21       |
| 5     | 167.8      |                                               |                       |           |              |
| 6     | 55.5       | 5.05, dd (9.1, 3.4)                           | 5, 7, 22              | 7, 6-NH   | 29           |
| 7     | 71.0       | 5.50, qd (6.4, 3.4)                           | 8                     | 6, 29     |              |
| 8     | 168.1      |                                               |                       |           |              |
| 9     | 74.4       | 4.57, d (8.6)                                 | 8, 10, 30, 31,<br>32  | 30        | 31, 32       |
| 10    | 174.9      |                                               |                       |           |              |
| 11    | 45.3       |                                               |                       |           |              |
| 12    | 39.2       | 3.04, dd (14.0, 10.4)<br>2.95, dd (14.0, 4.4) | 1, 2, 13,<br>14/18    | 2         | 33,<br>14/18 |
| 13    | 137.6      |                                               |                       |           |              |
| 14/18 | 129.1      | 7.23, overlapped                              | 12, 16                | 15/17     | 2, 12        |
| 15/17 | 128.3      | 7.28, overlapped                              | 13                    | 14/18, 16 |              |
| 16    | 126.4      | 7.20, overlapped                              | 14/18                 | 15/17     |              |
| 19    | 30.3       | 1.70, m                                       |                       | 20, 21    |              |
| 20    | 15.9       | 0.30, d (6.9)                                 | 4, 19, 21             | 19        |              |
| 21    | 18.4       | 0.67, d (6.9)                                 | 4, 19, 20             | 19        |              |
| 22    | 167.8      |                                               |                       |           |              |
| 23    | 135.2      |                                               |                       |           |              |
| 24    | 114.8      | 7.28, overlapped                              | 22, 26, 28            |           |              |
| 25    | 157.2      |                                               |                       |           |              |
| 26    | 118.5      | 6.94, ddd (8.0, 2.5, 1.0)                     | 24, 25, 28            | 27        |              |
| 27    | 129.2      | 7.28, overlapped                              | 25                    | 26, 28    |              |
| 28    | 118.5      | 7.34, br d (7.7)                              | 22, 24, 26            | 27        |              |
| 29    | 15.4       | 1.20, d (6.4)                                 | 6, 7                  | 7         | 35, 6-<br>NH |
| 30    | 35.4       | 1.84, m                                       | 9, 31                 | 9, 31, 32 |              |
| 31    | 13.9       | 0.86, d (6.9)                                 | 9, 30, 32             | 30        |              |
| 32    | 24.2       | 1.49, m<br>1.16, m                            | 31                    | 30, 35    |              |
| 33    | 26.3       | 1.30, s                                       | 1, 10, 11, 34         |           | 1, 1-OH      |
| 34    | 21.9       | 1.26, s                                       | 1, 10, 11, 33         |           | 1, 2         |
| 35    | 10.2       | 0.83, t (7.5)                                 | 30, 32                | 32        | 29, 32       |



|       | $\delta_C$ | $\delta_H$     | HMBC  | COSY | ROESY  |
|-------|------------|----------------|-------|------|--------|
| 1-OH  |            | 4.38, d (10.5) | 1     | 1    | 33     |
| 6-NH  |            | 8.65, d (9.1)  | 5, 22 | 6    | 28, 29 |
| 25-OH |            | 9.67 br, s     |       |      |        |

**Table S10. <sup>1</sup>H NMR (600 MHz CDCl<sub>3</sub>) Data for the MTPA Esters of Bhdo**

|      | <i>S</i> -MTPA ester $\delta_{\text{H}}$<br>(multiplicity, $J$ = Hz) | <i>R</i> -MTPA ester $\delta_{\text{H}}$<br>(multiplicity, $J$ = Hz) | $\Delta\delta$ ( $\delta_{\text{S}} - \delta_{\text{R}}$ ) values |
|------|----------------------------------------------------------------------|----------------------------------------------------------------------|-------------------------------------------------------------------|
| 2-Me | 1.34, s                                                              | 1.33, s                                                              | +0.01                                                             |
|      | 1.12, s                                                              | 1.06, s                                                              | +0.06                                                             |
| 3    | 5.47, d (3.8)                                                        | 5.51, d (3.7)                                                        | -0.04                                                             |
| 4    | 4.83, dt (9.4, 3.8)                                                  | 4.89, dt (9.4, 3.8)                                                  | -0.06                                                             |
| 5    | 2.78, dd (14.7, 9.4)                                                 | 2.82, dd (14.7, 9.4)                                                 | -0.04                                                             |
|      | 2.69, dd (14.9, 4.0)                                                 | 2.76, dd (14.7, 3.8)                                                 | -0.07                                                             |
| 7/11 | 7.13, d (6.8)                                                        | 7.18, d (7.4)                                                        | -0.05                                                             |
| 8/10 | 7.48, m                                                              | 7.48, m                                                              |                                                                   |
| 9    | 7.53, m                                                              | 7.53, m                                                              |                                                                   |

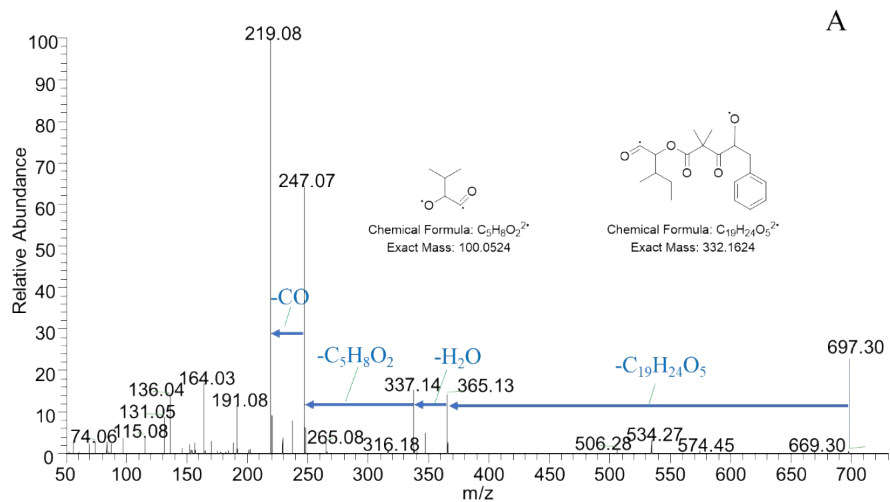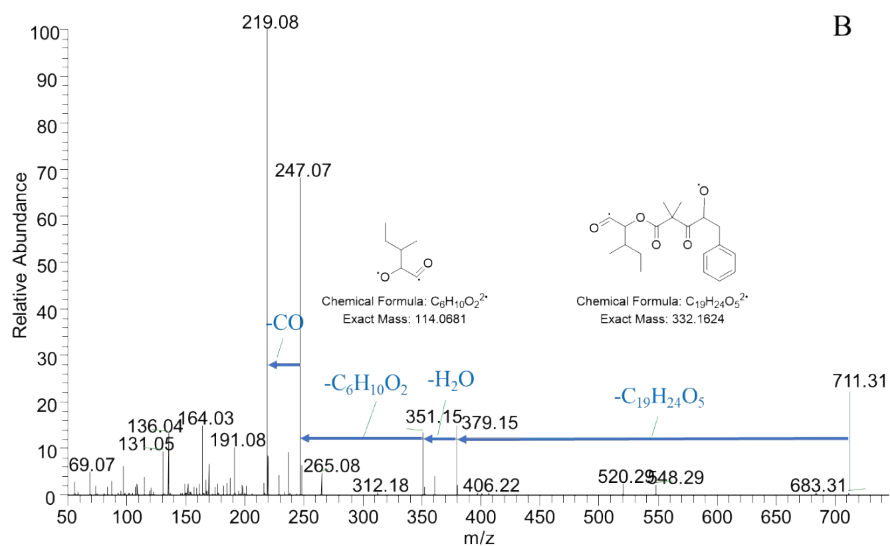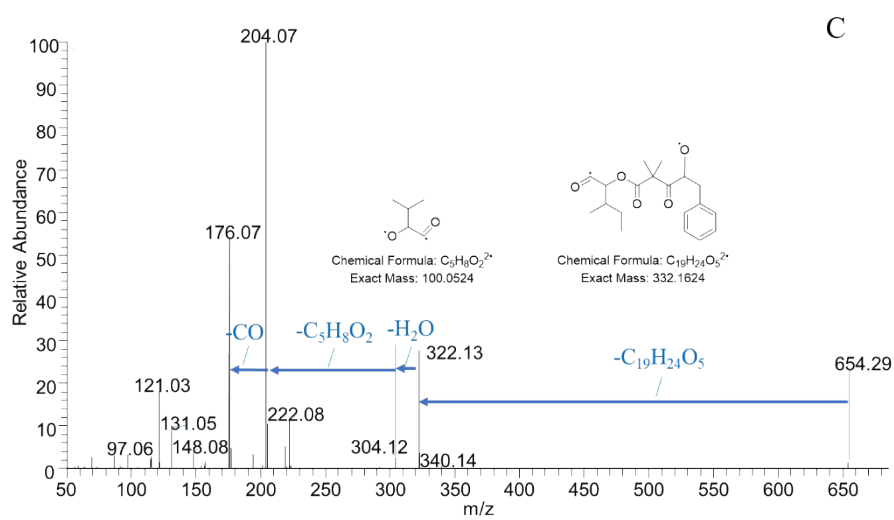

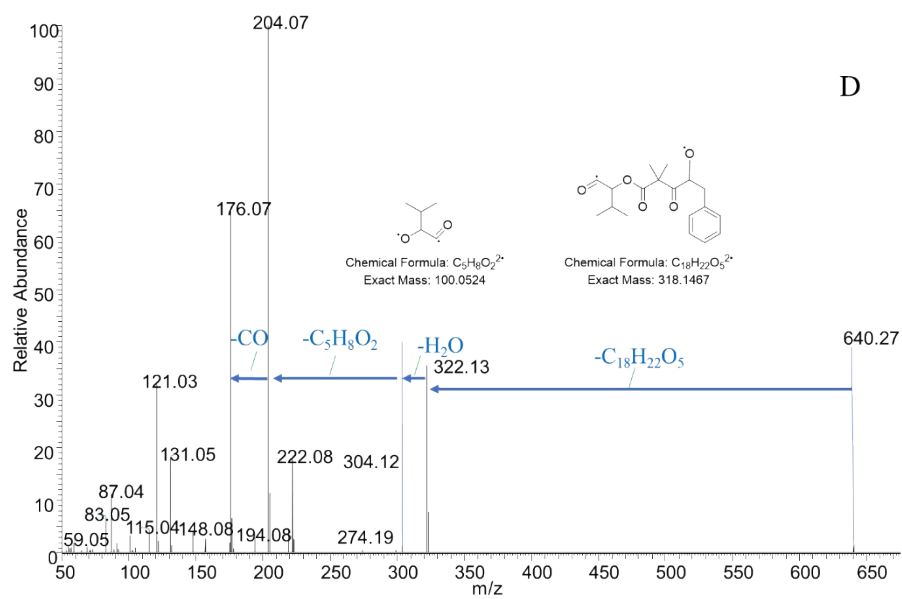

**Figure S1 MS/MS spectrum of NAT-H (A), NAT-L (B), UAT-B1&B2 (C), and UAT-D1&D2 (D)**

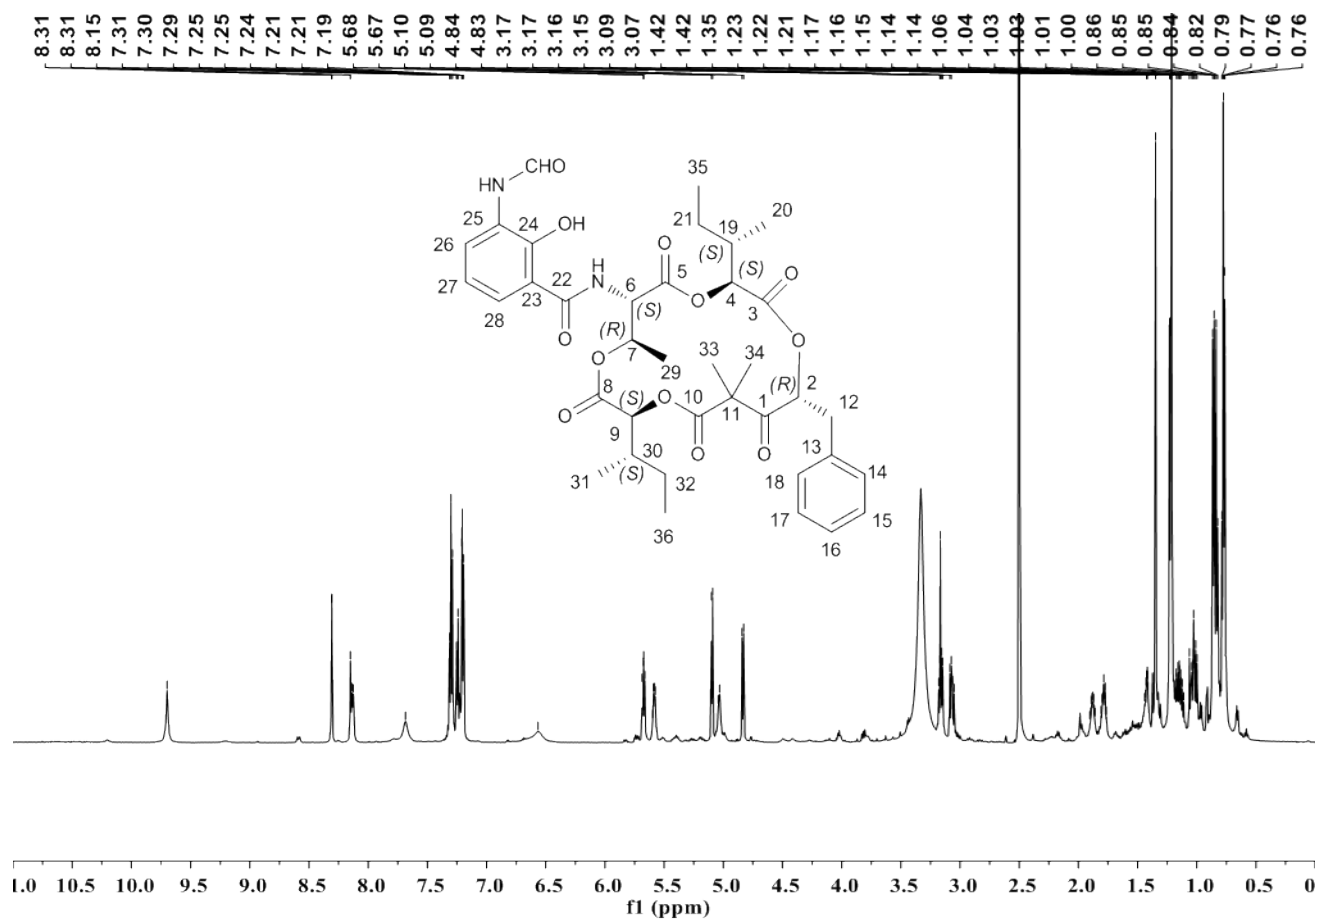

Figure S2a  $^1\text{H}$  NMR spectrum of **1** in  $\text{DMSO-}d_6$

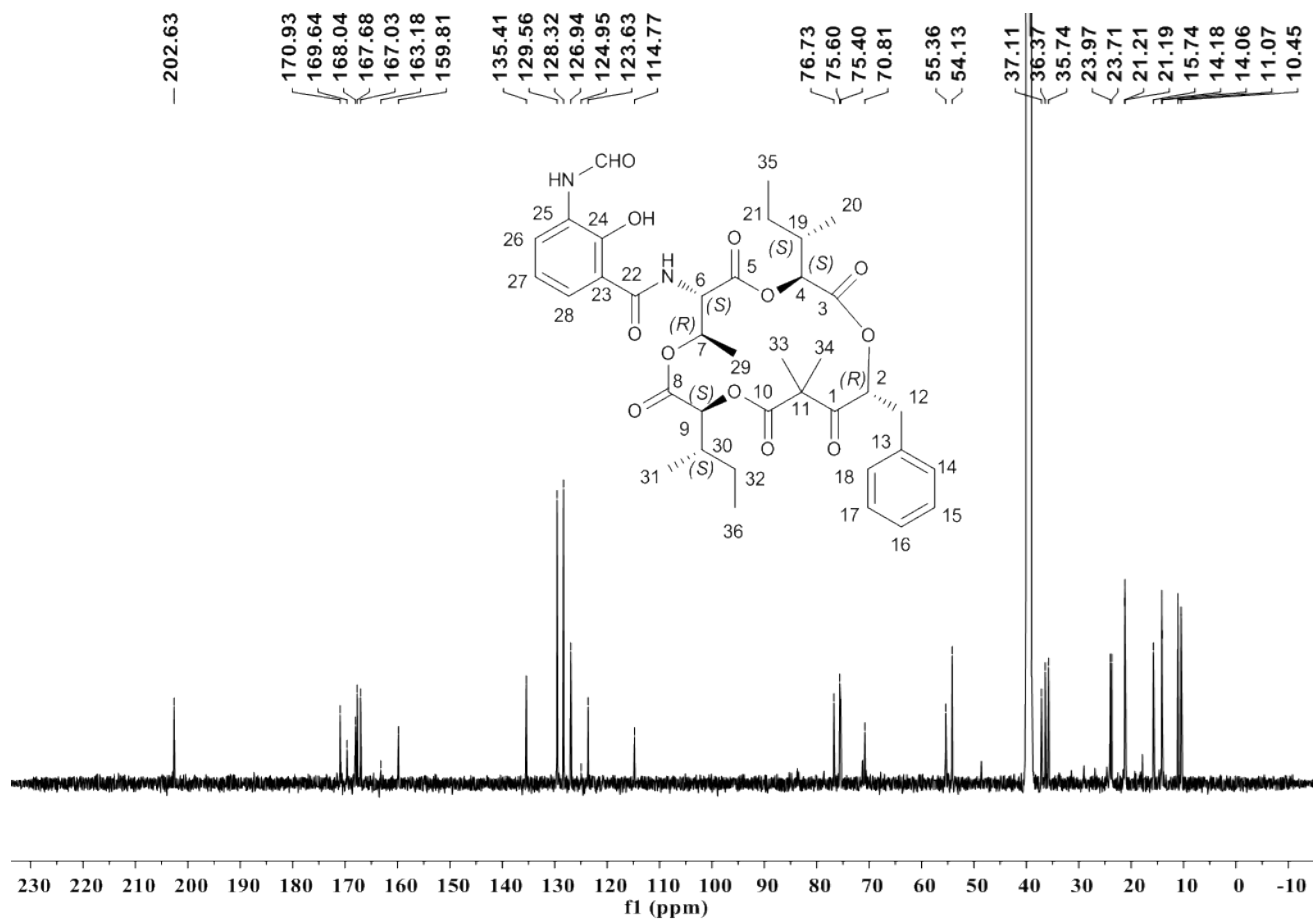

Figure S2b  $^{13}\text{C}$  NMR spectrum of 1 in  $\text{DMSO-}d_6$

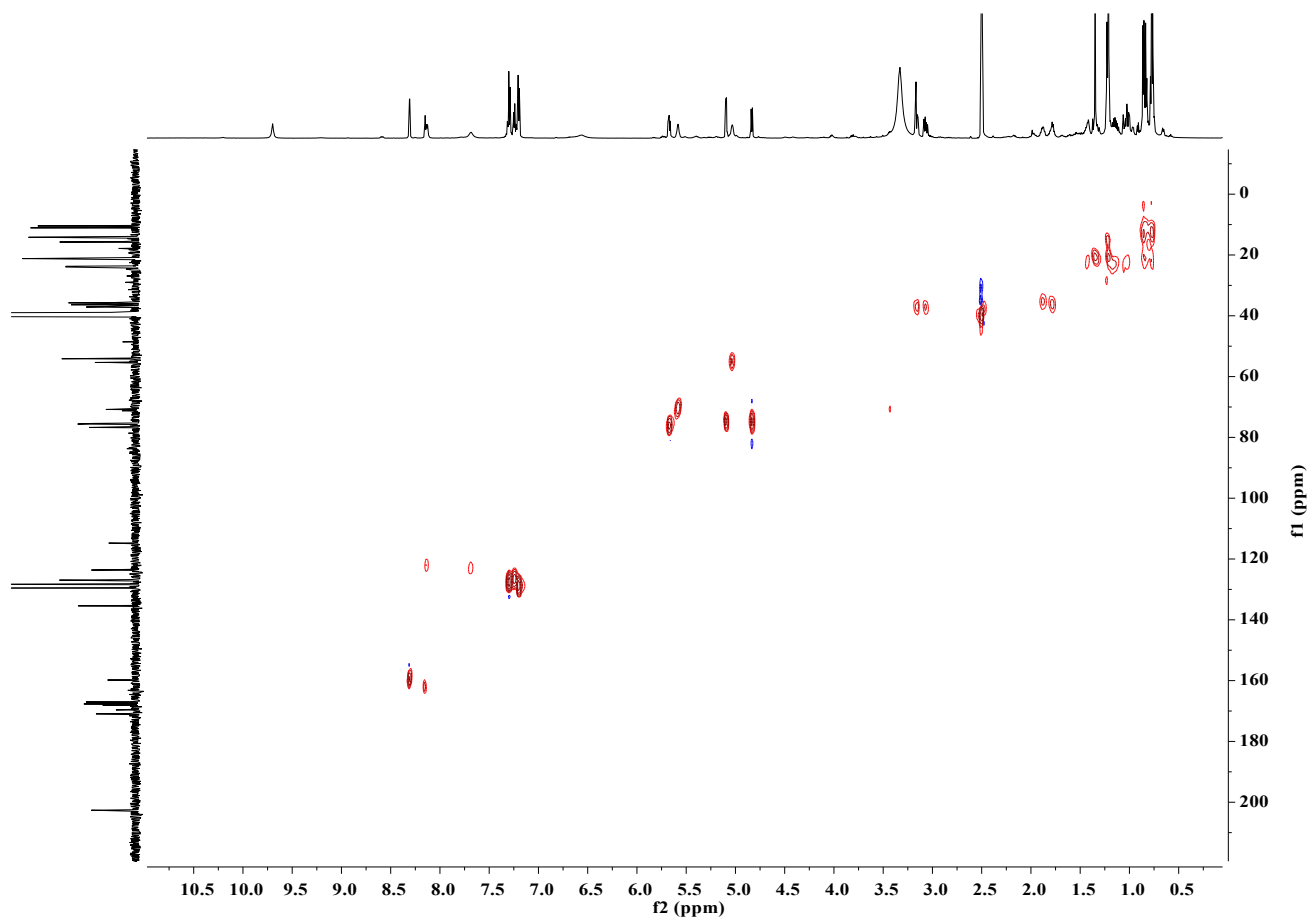

Figure S2c HSQC spectrum of 1 in  $\text{DMSO-}d_6$

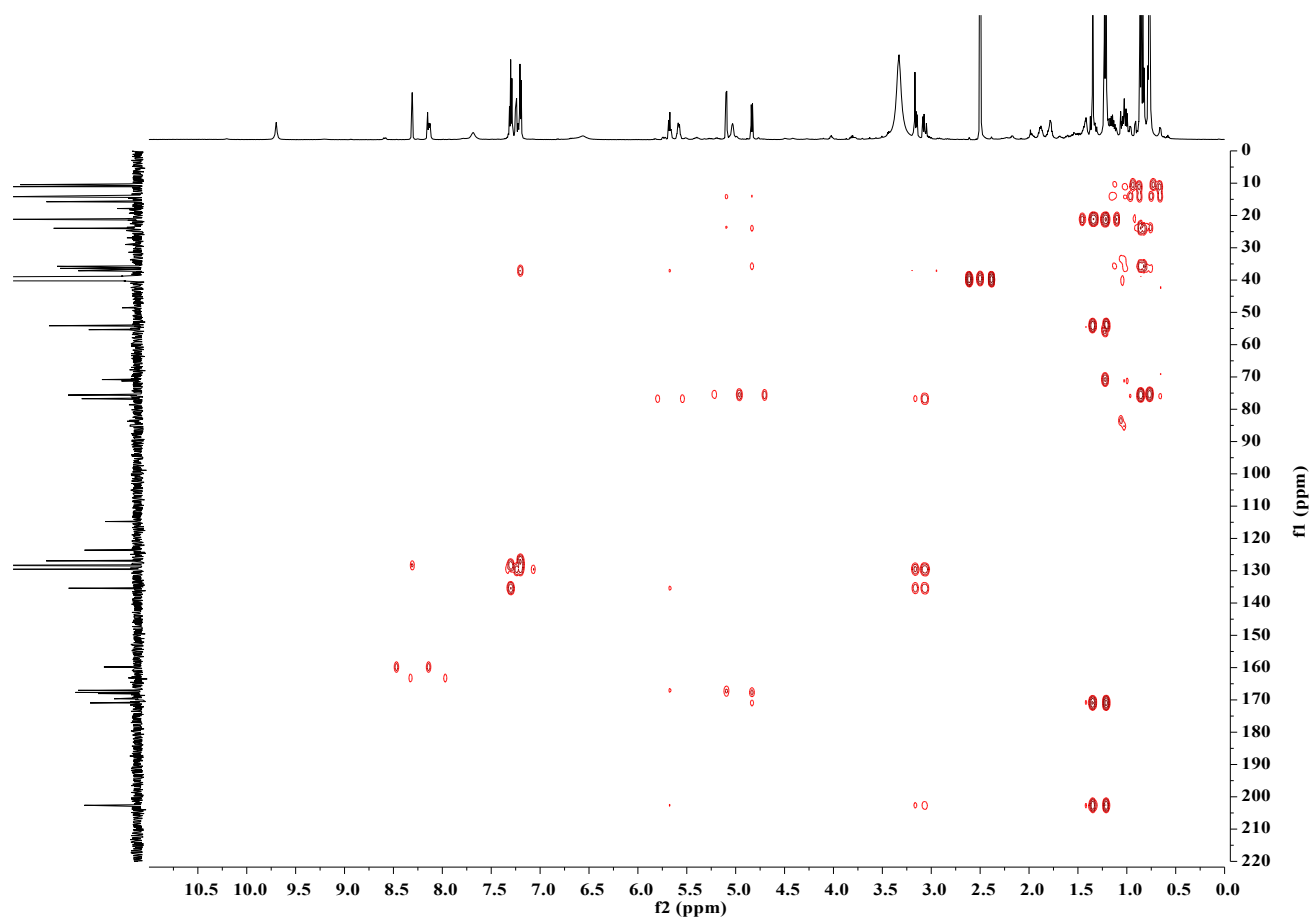

Figure S2d HMBC spectrum of 1 in DMSO-*d*<sub>6</sub>



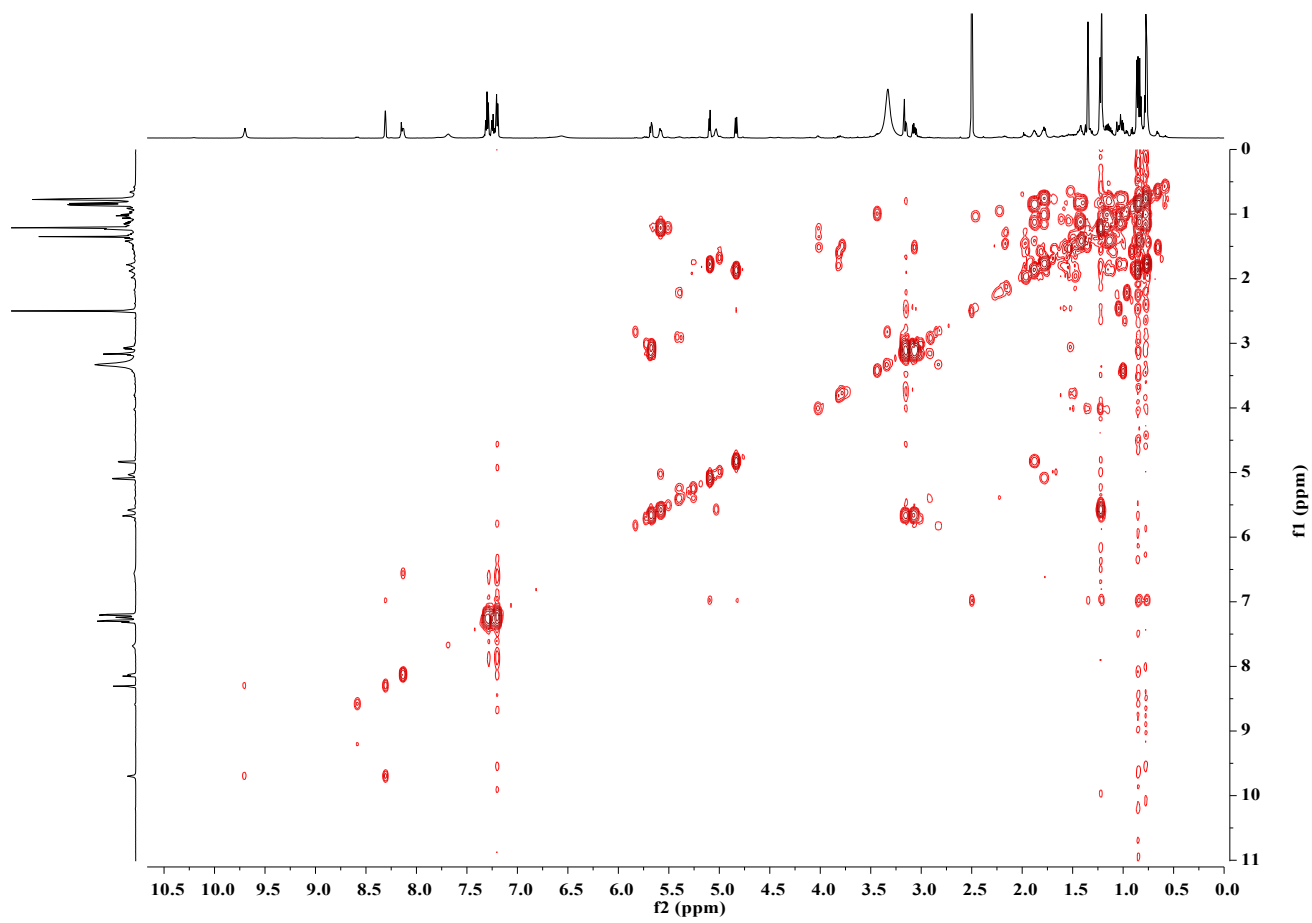

Figure S2e  $^1\text{H}$ - $^1\text{H}$  COSY spectrum of 1 in  $\text{DMSO-}d_6$

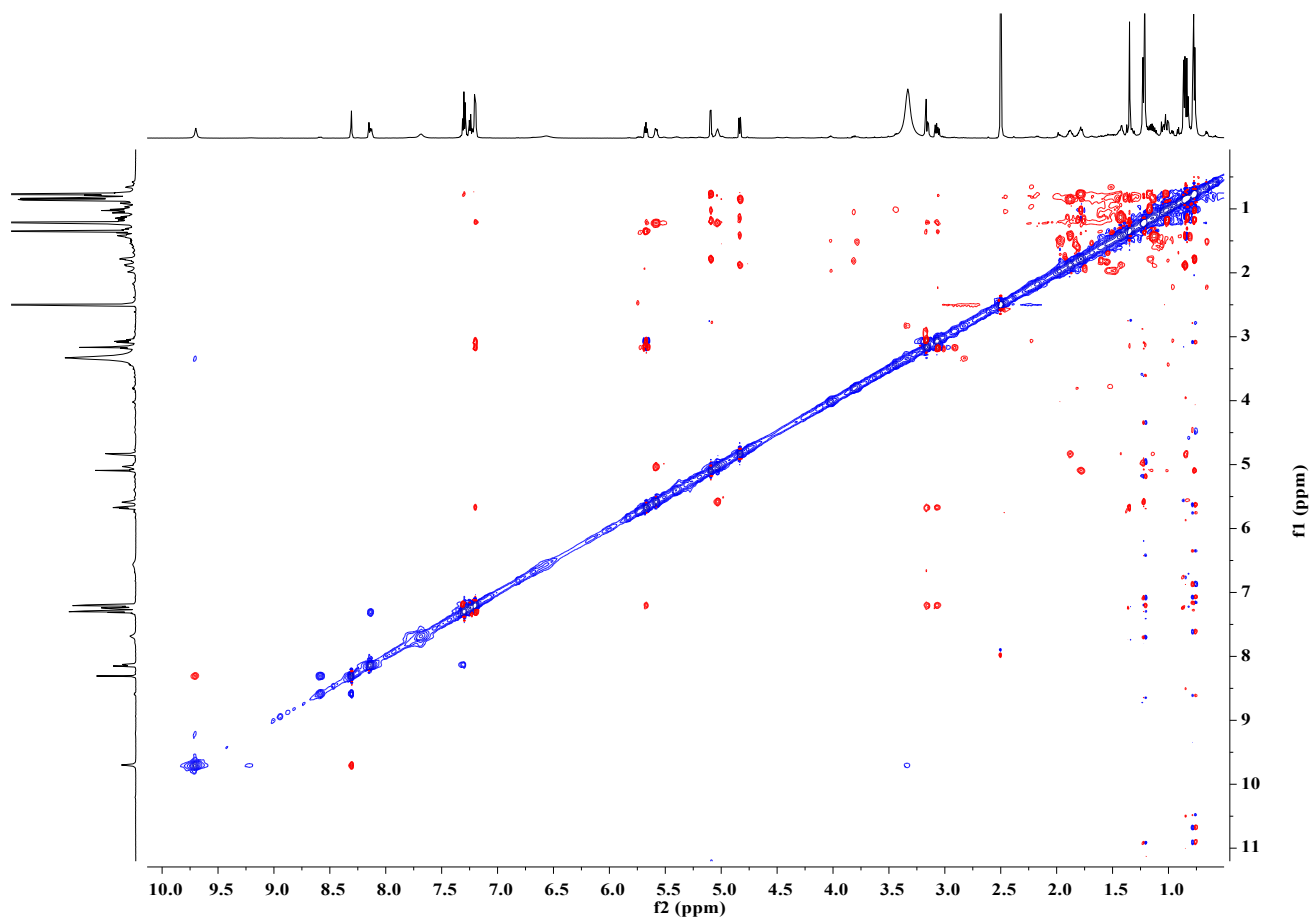

Figure S2f ROESY spectrum of 1 in DMSO-*d*<sub>6</sub>

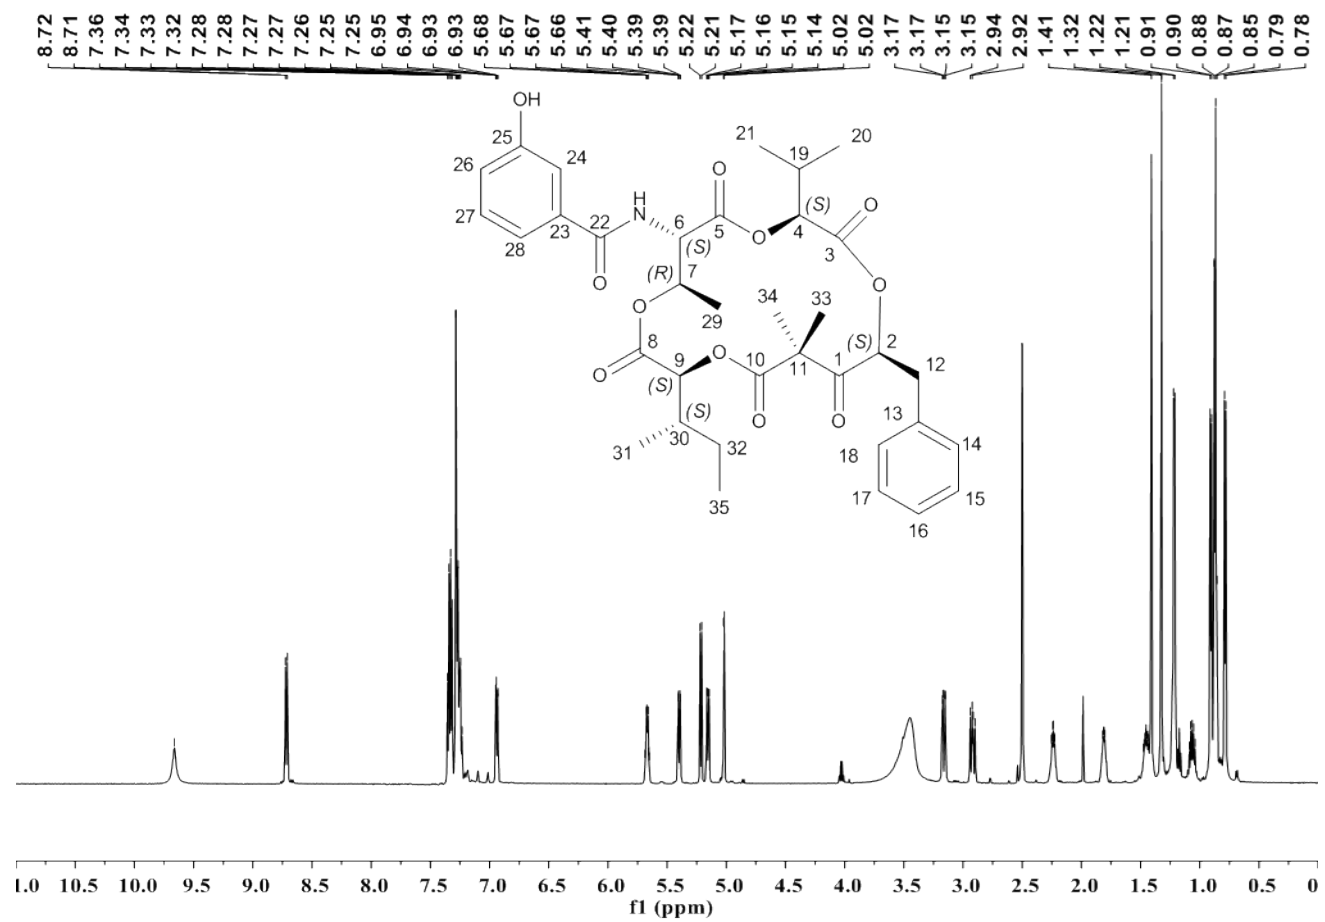

Figure S3a  $^1\text{H}$  NMR spectrum of 2 in  $\text{DMSO-}d_6$

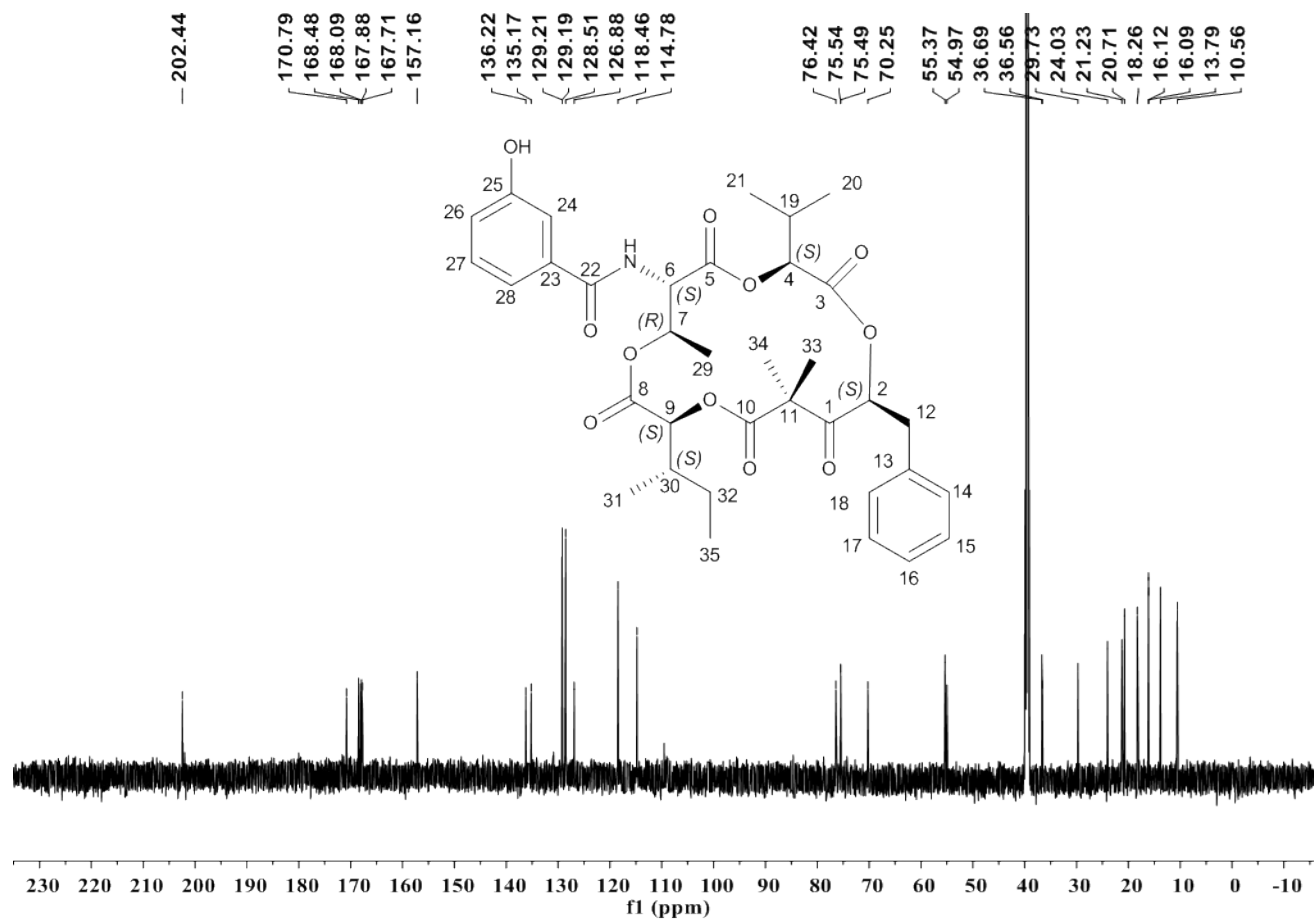

Figure S3b <sup>13</sup>C NMR spectrum of 2 in DMSO-*d*<sub>6</sub>

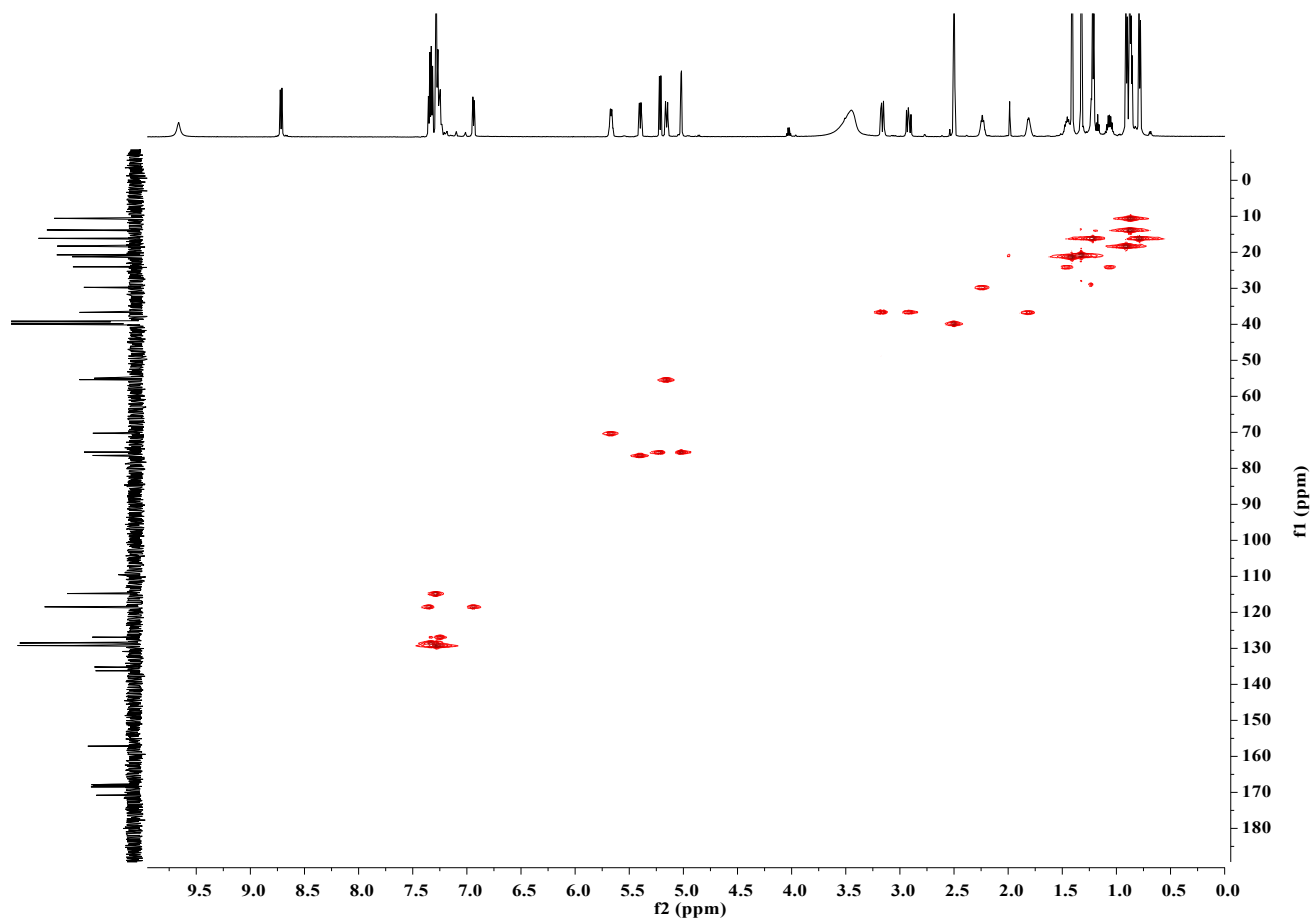

Figure S3c HSQC spectrum of 2 in DMSO- $d_6$

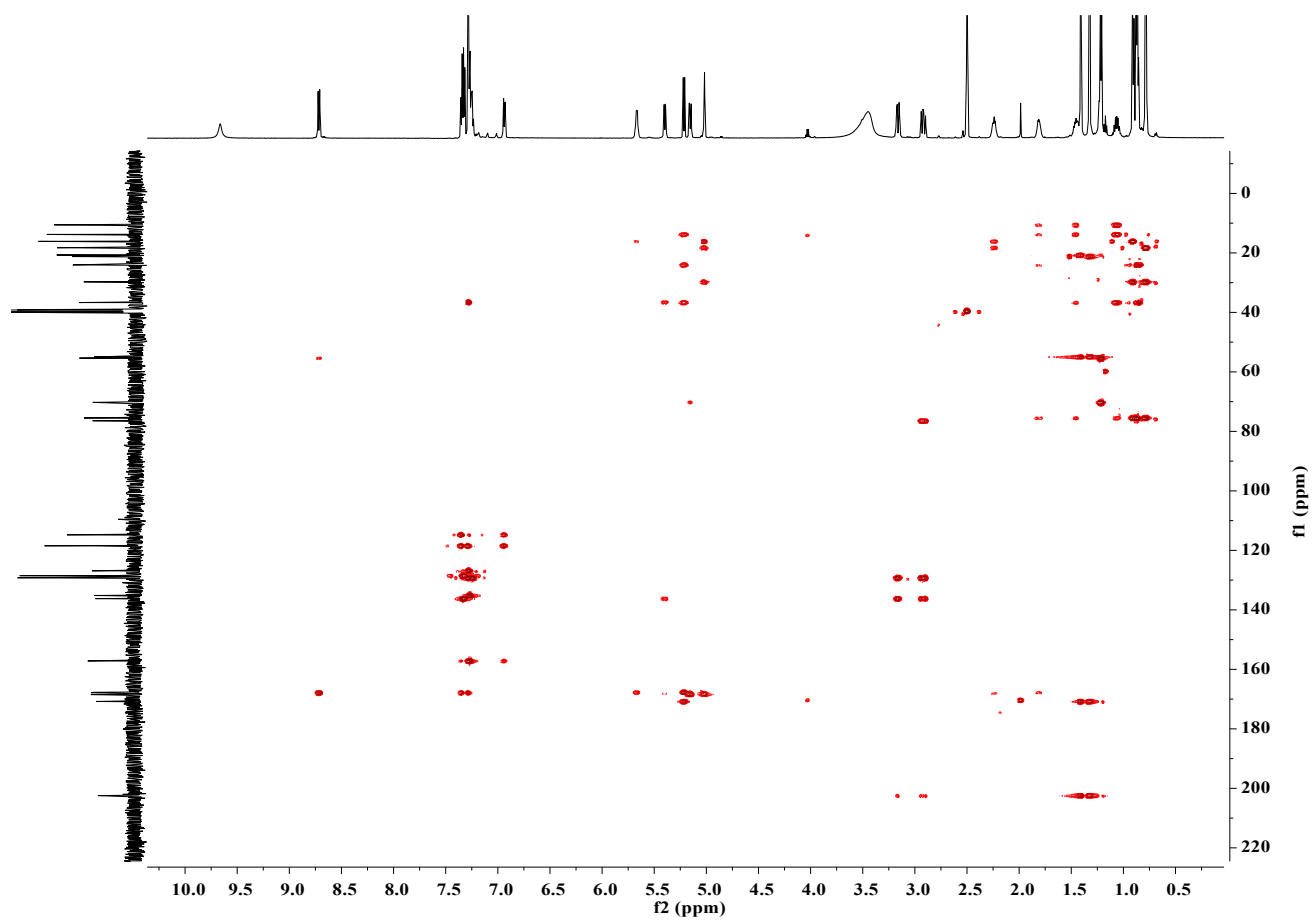

Figure S3d HMBC spectrum of 2 in DMSO-*d*<sub>6</sub>

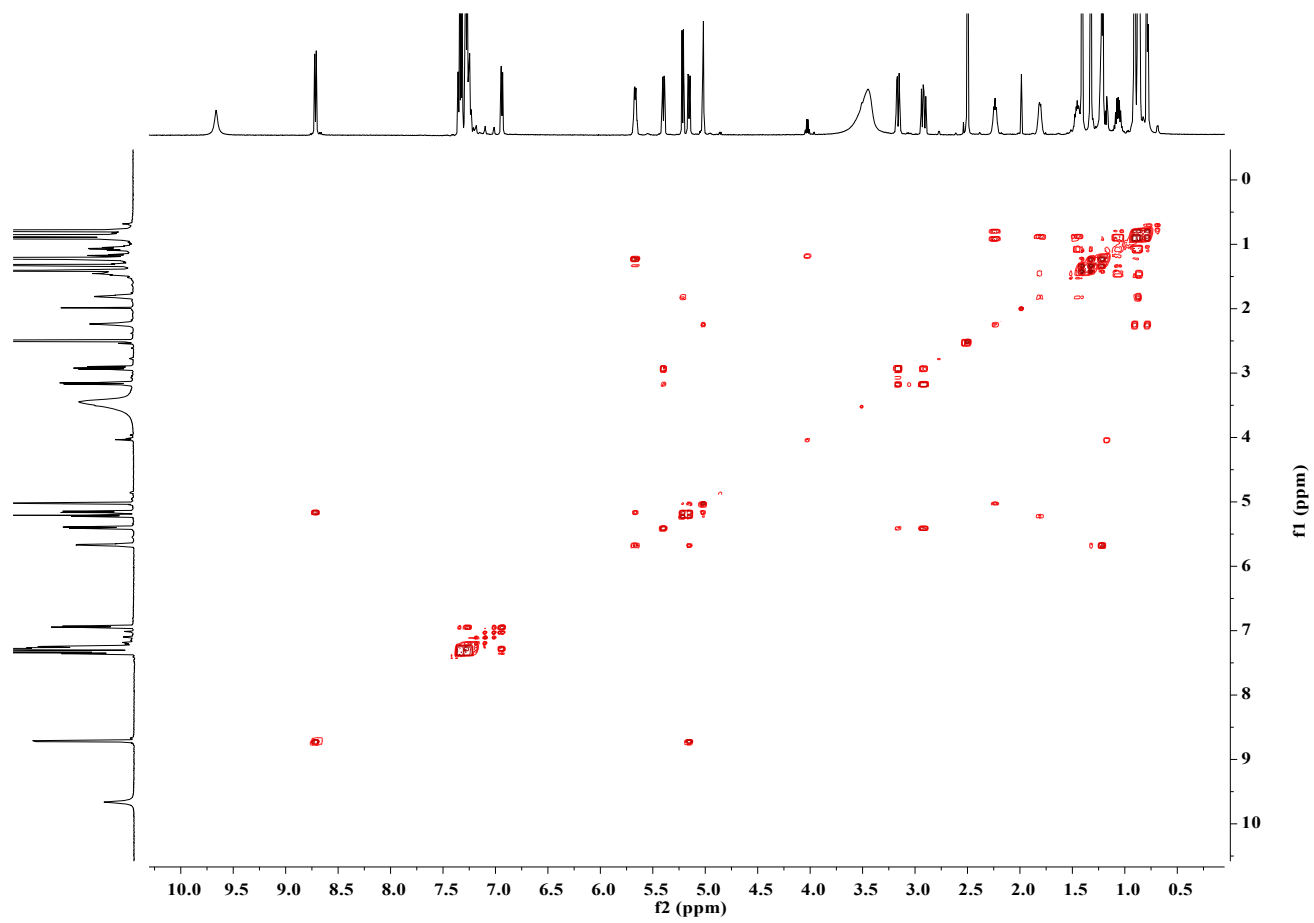

Figure S3e  $^1\text{H}$ - $^1\text{H}$  COSY spectrum of 2 in  $\text{DMSO-}d_6$

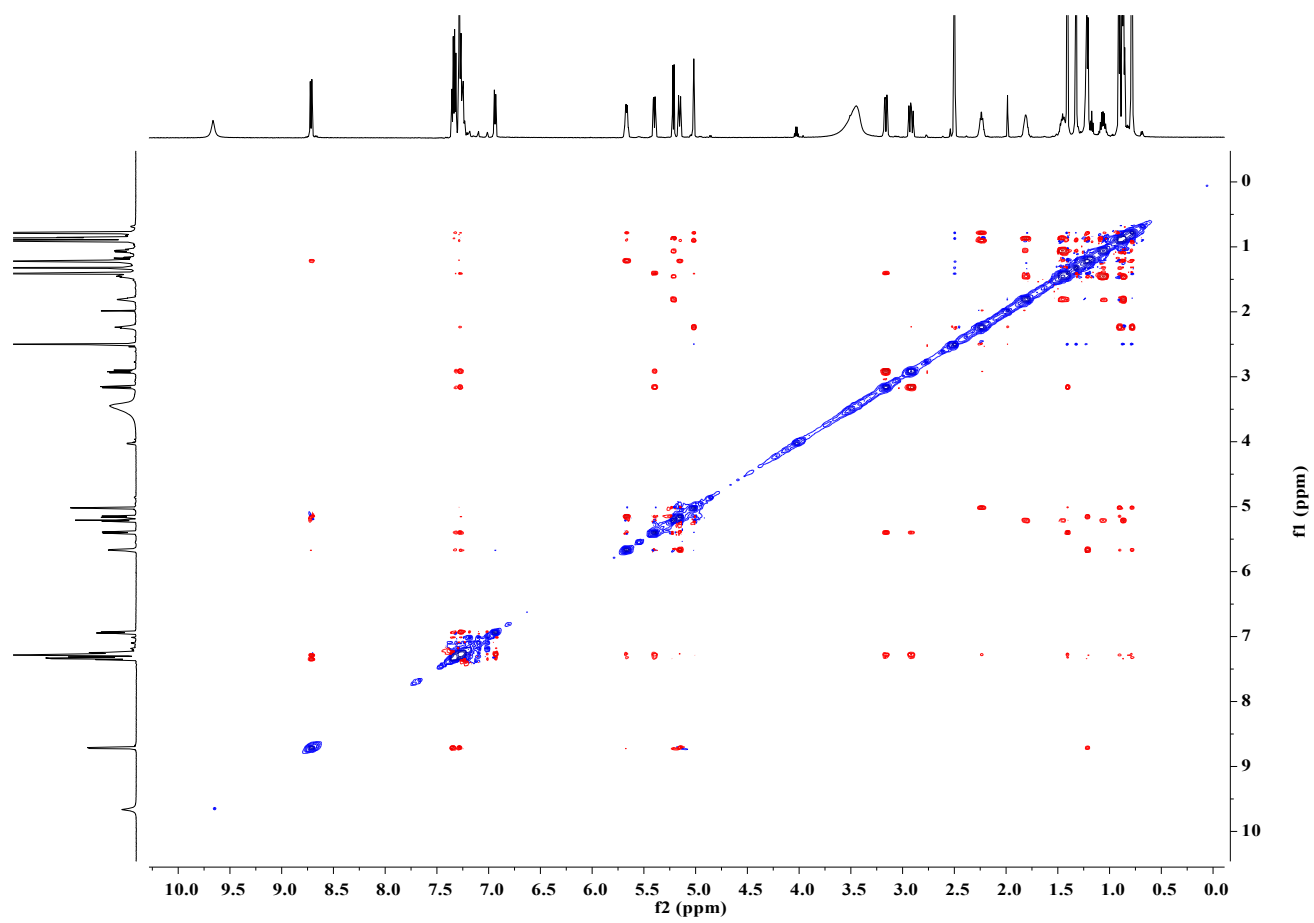

Figure S3f ROESY spectrum of 2 in DMSO-*d*<sub>6</sub>



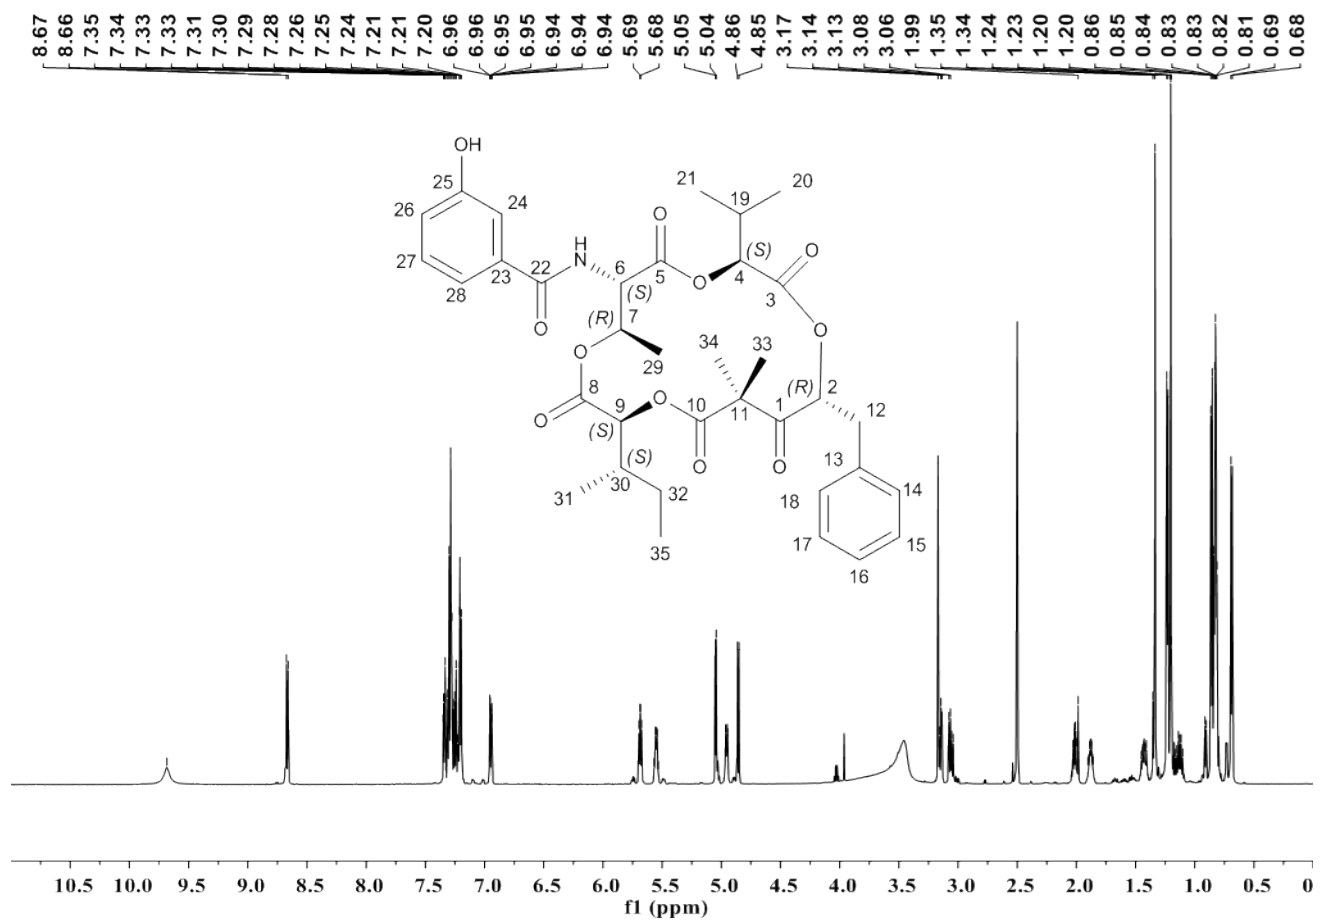

Figure S4a <sup>1</sup>H NMR spectrum of 3 in DMSO-*d*<sub>6</sub>

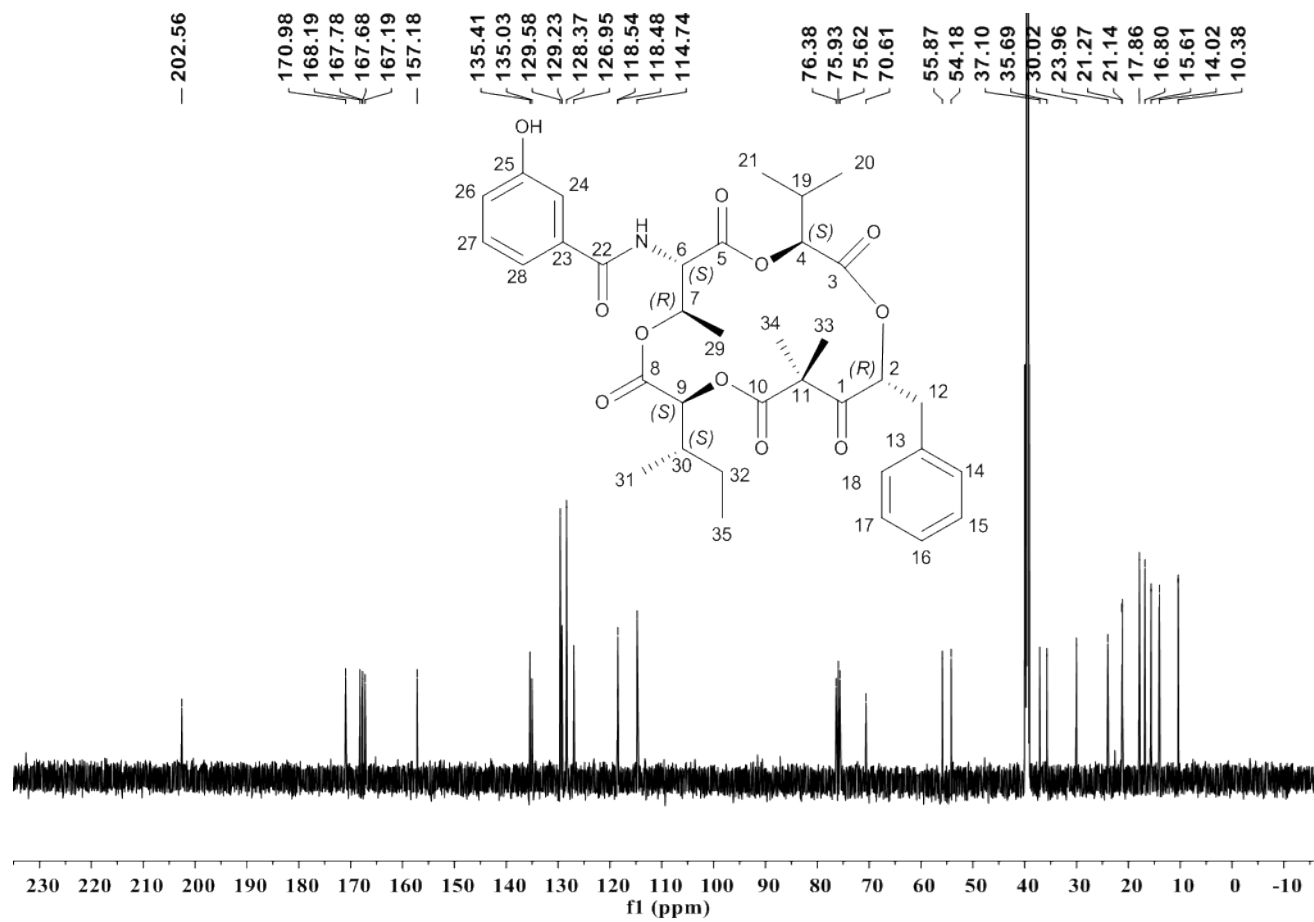

Figure S4b <sup>13</sup>C NMR spectrum of 3 in DMSO-*d*<sub>6</sub>

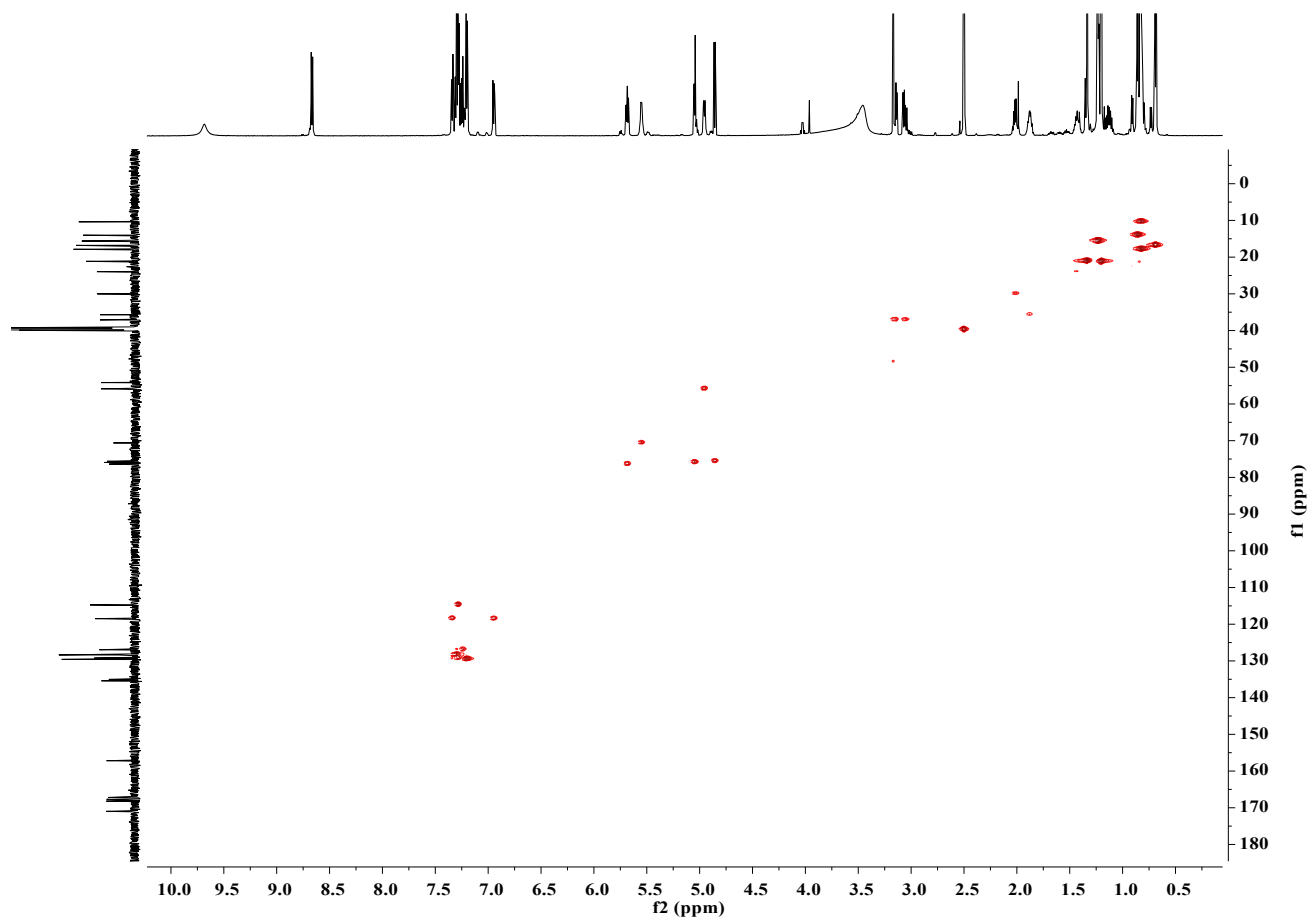

Figure S4c HSQC spectrum of 3 in DMSO-*d*<sub>6</sub>

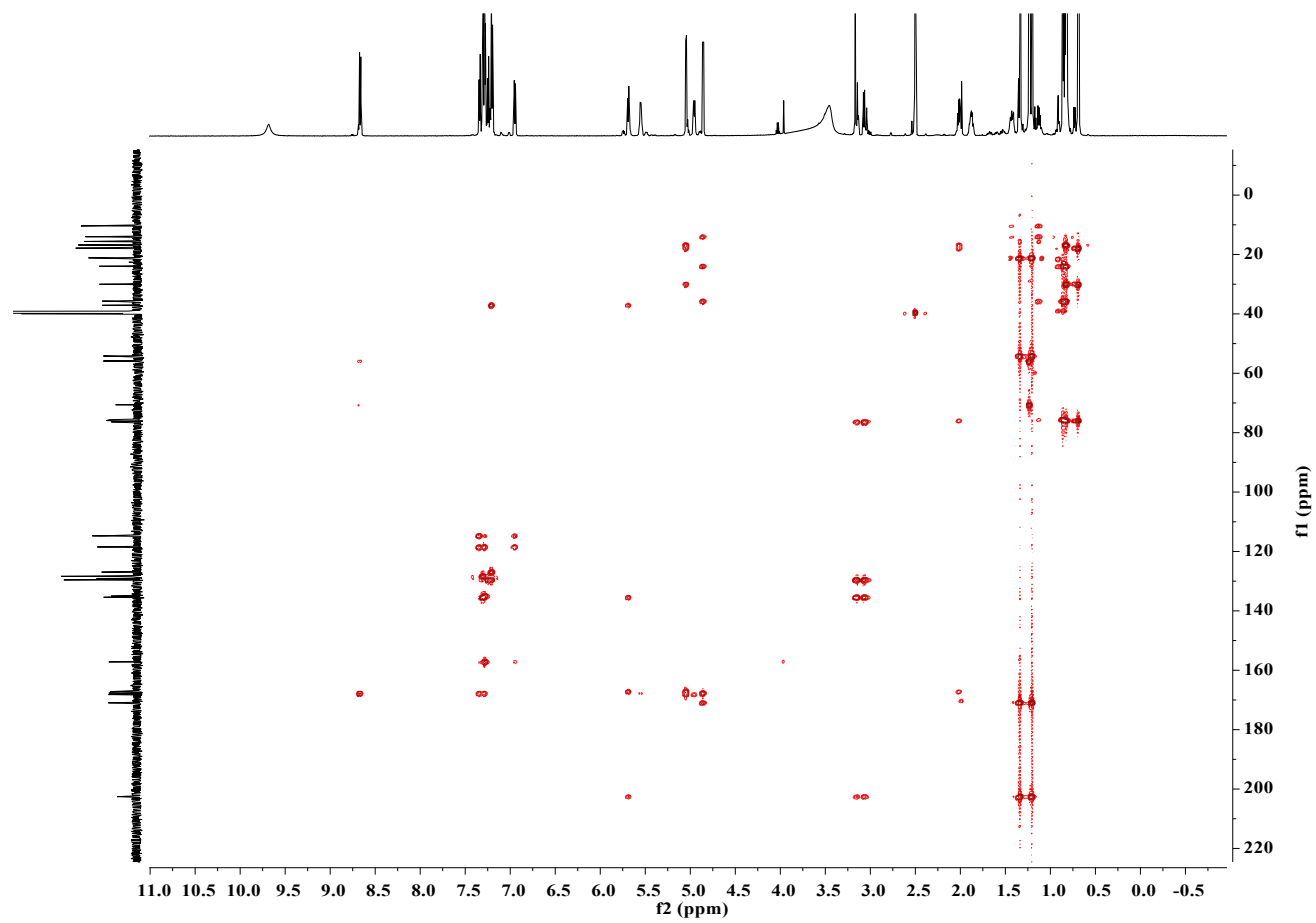

Figure S4d HMBC spectrum of 3 in  $\text{DMSO-}d_6$

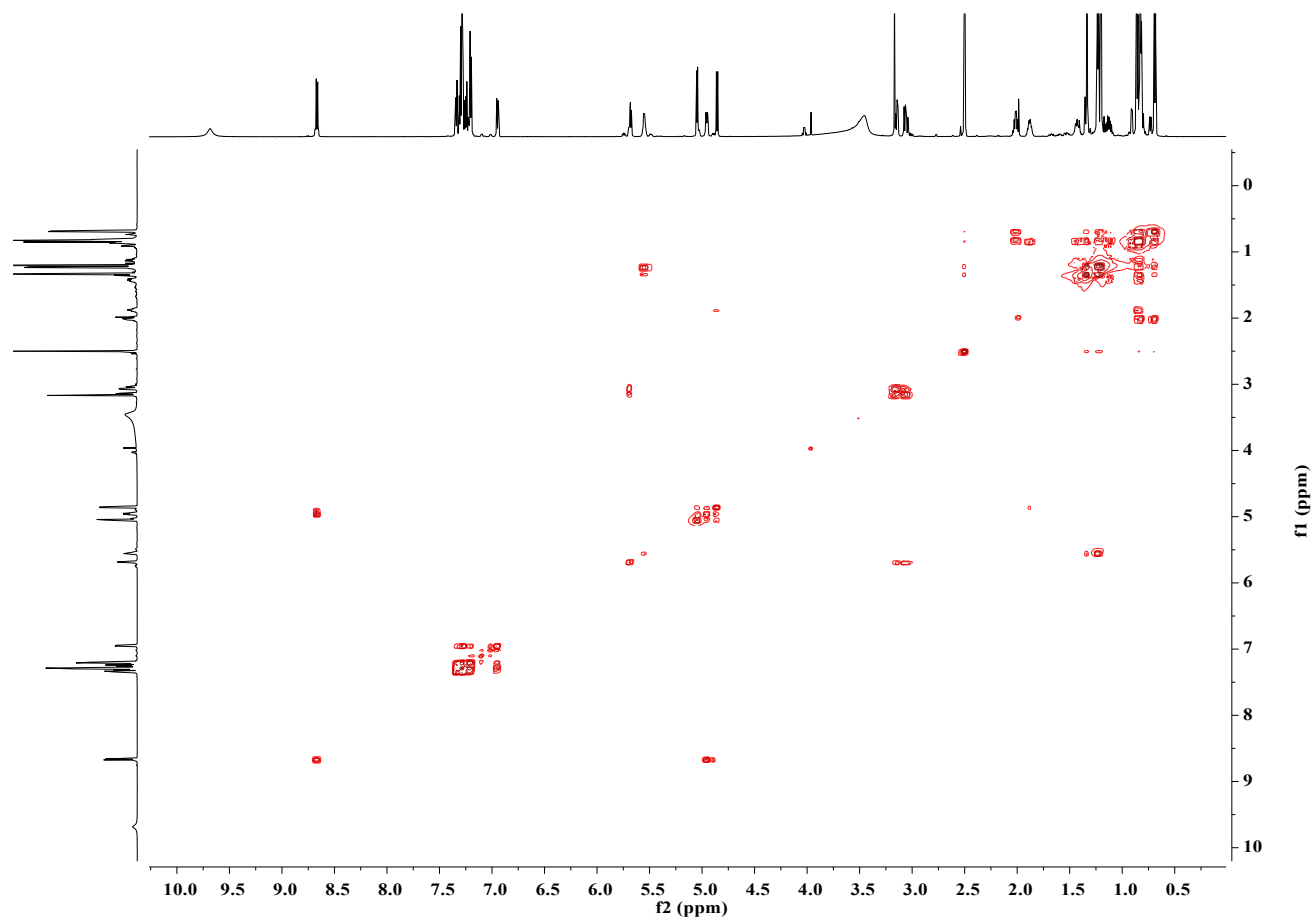

Figure S4e  $^1\text{H}$ - $^1\text{H}$  COSY spectrum of 3 in  $\text{DMSO-}d_6$

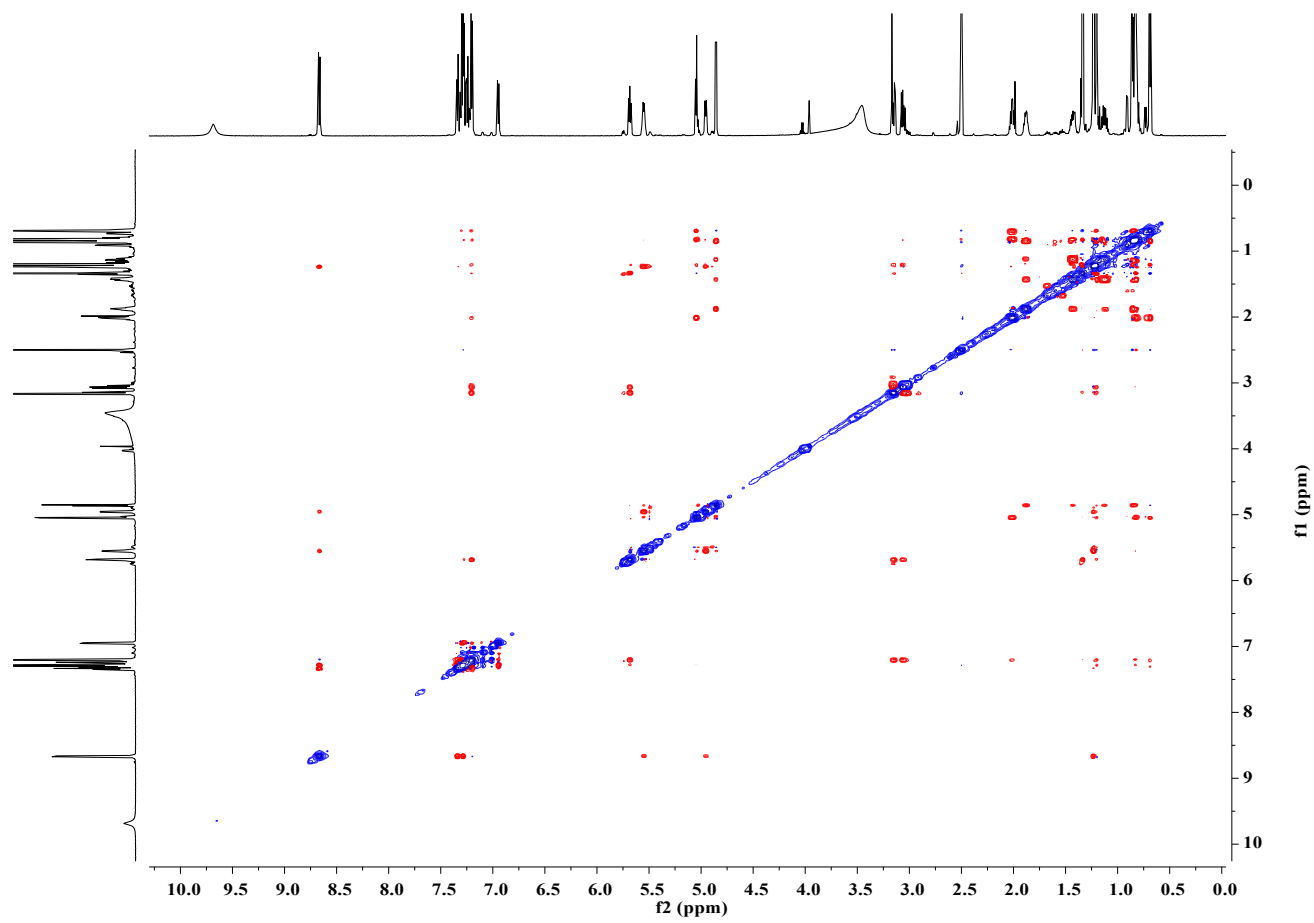

Figure S4f ROESY spectrum of 3 in DMSO- $d_6$

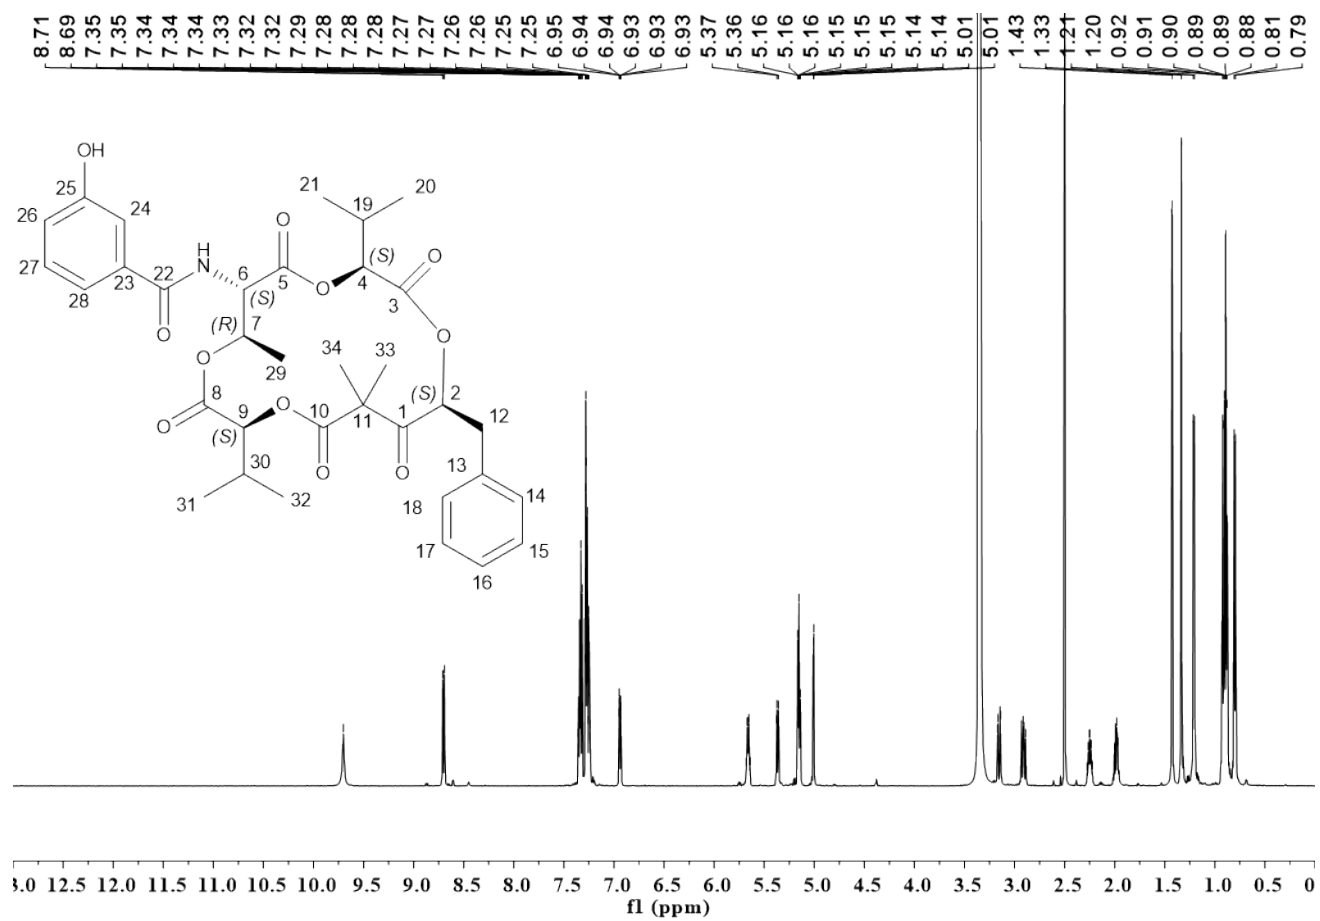

Figure S5a  $^1\text{H}$  NMR spectrum of 4 in  $\text{DMSO-}d_6$

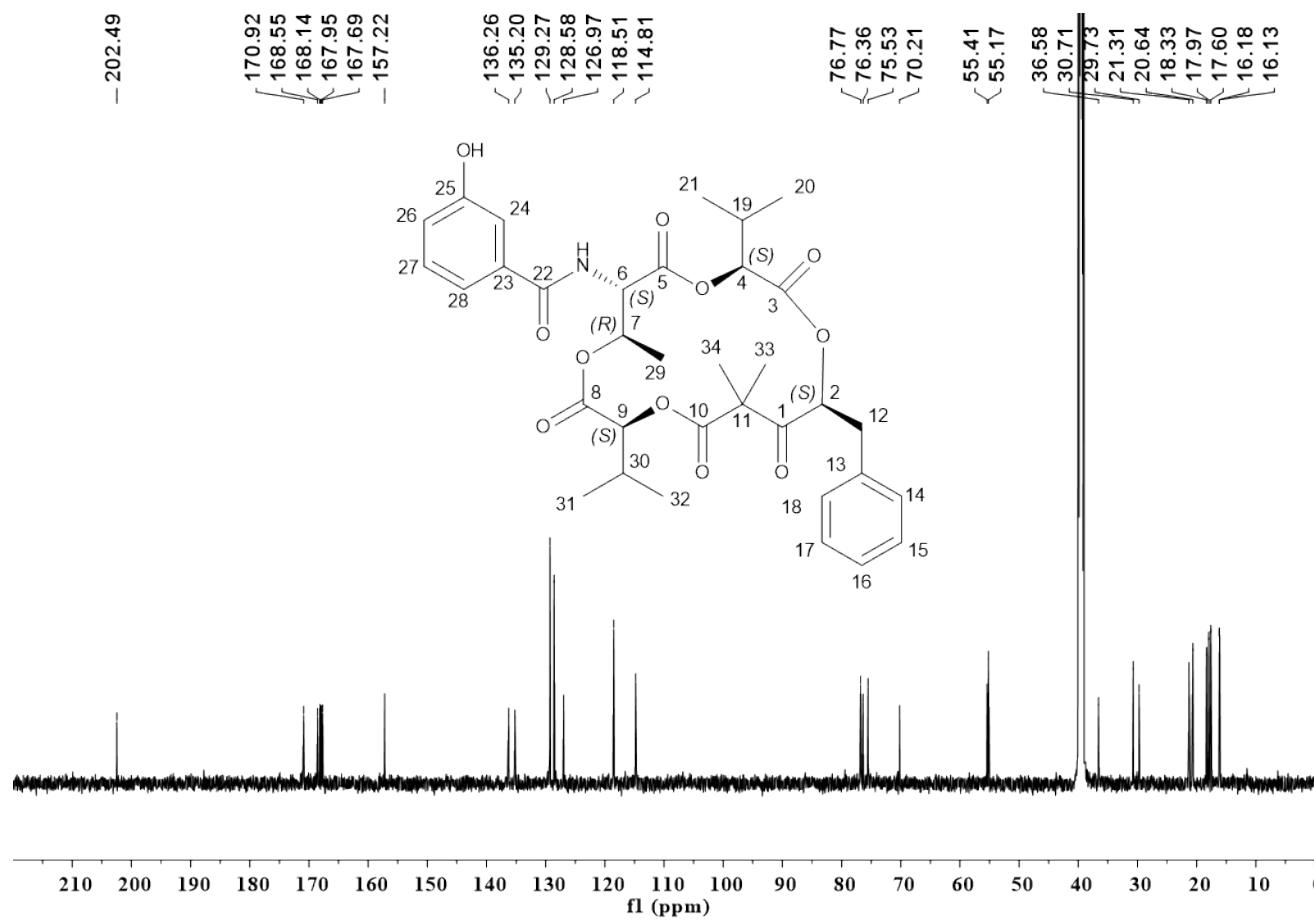

Figure S5b <sup>13</sup>C NMR spectrum of 4 in DMSO-*d*<sub>6</sub>



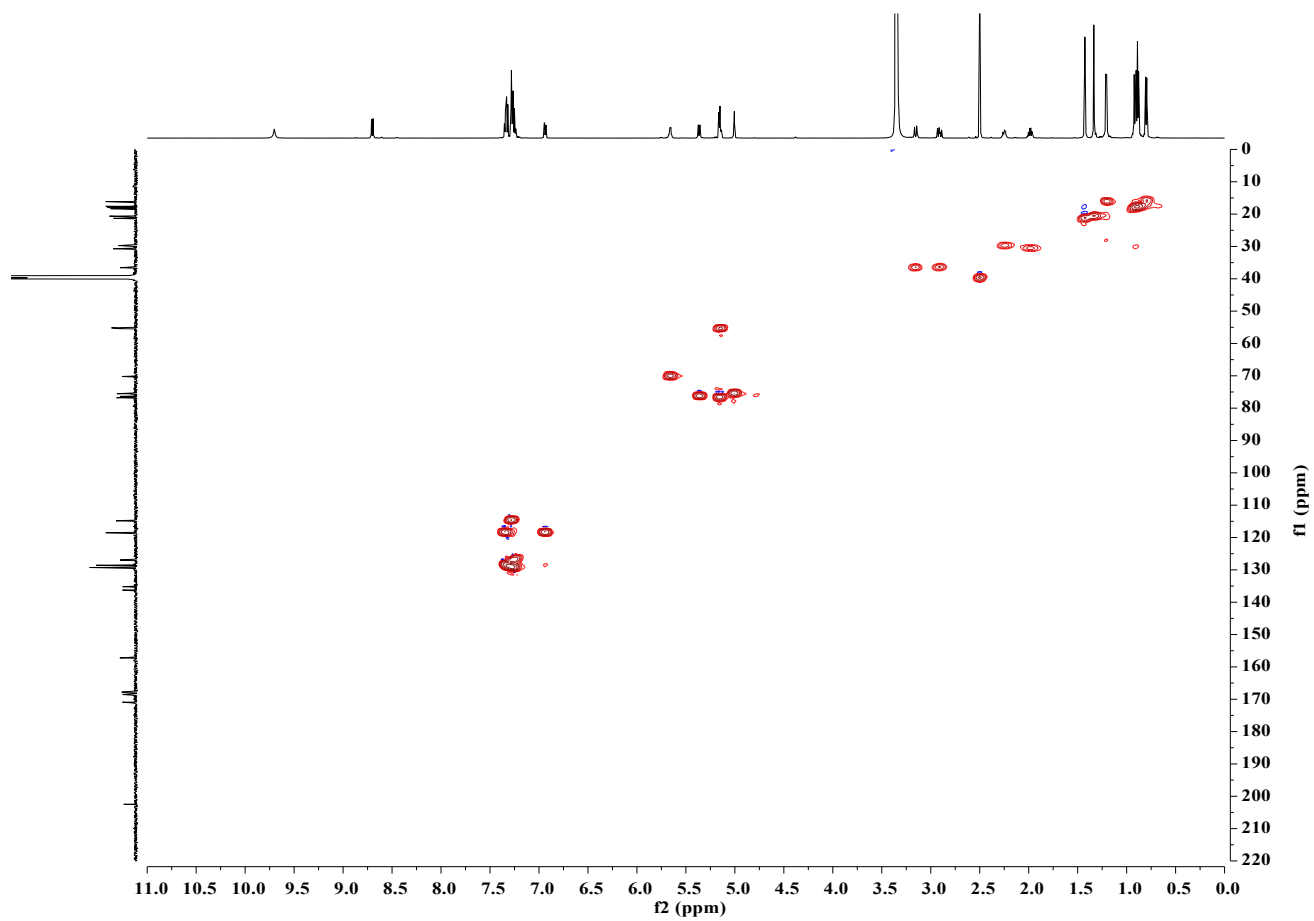

Figure S5c HSQC spectrum of 4 in  $\text{DMSO-}d_6$

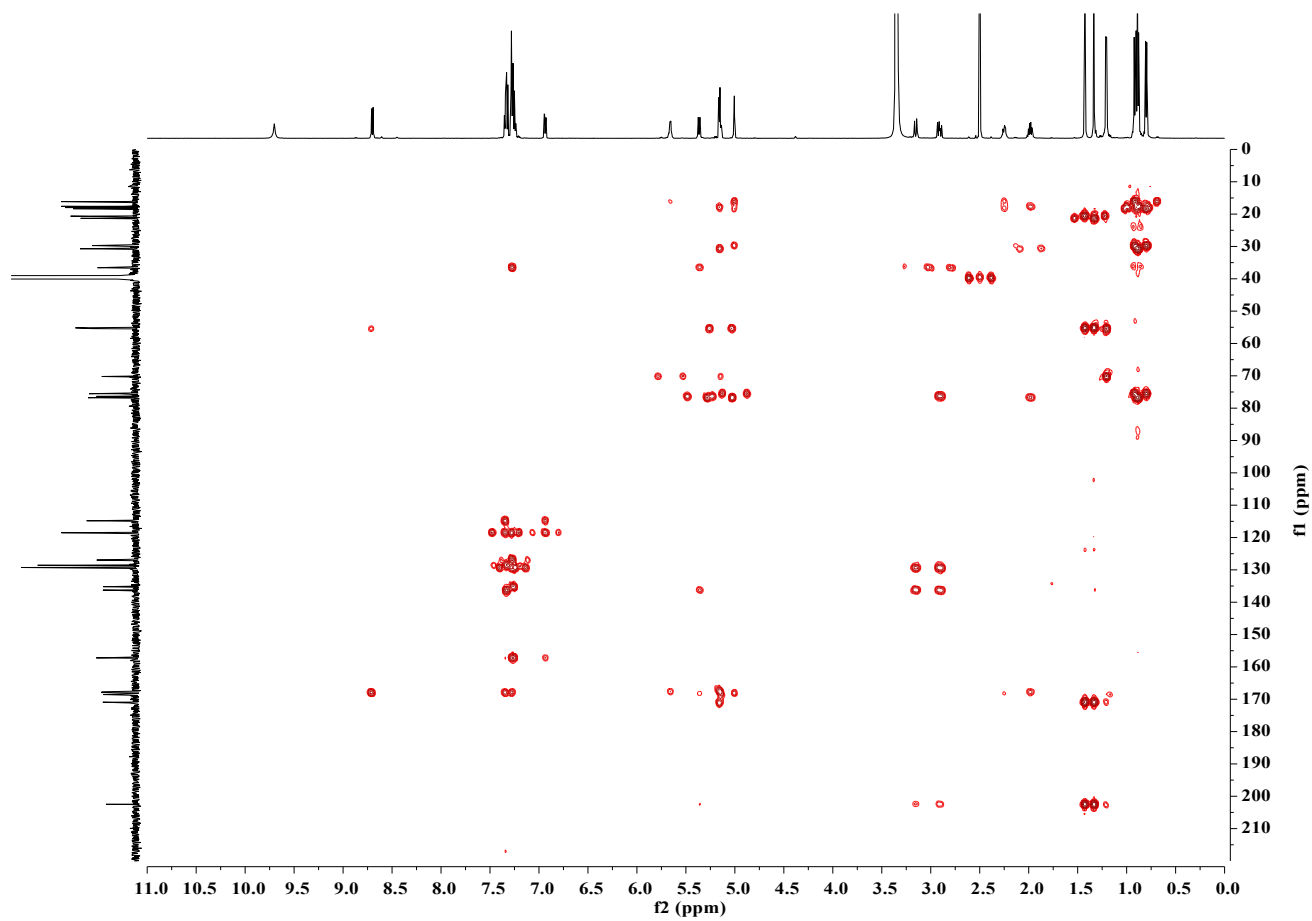

Figure S5d HMBC spectrum of 4 in DMSO- $d_6$

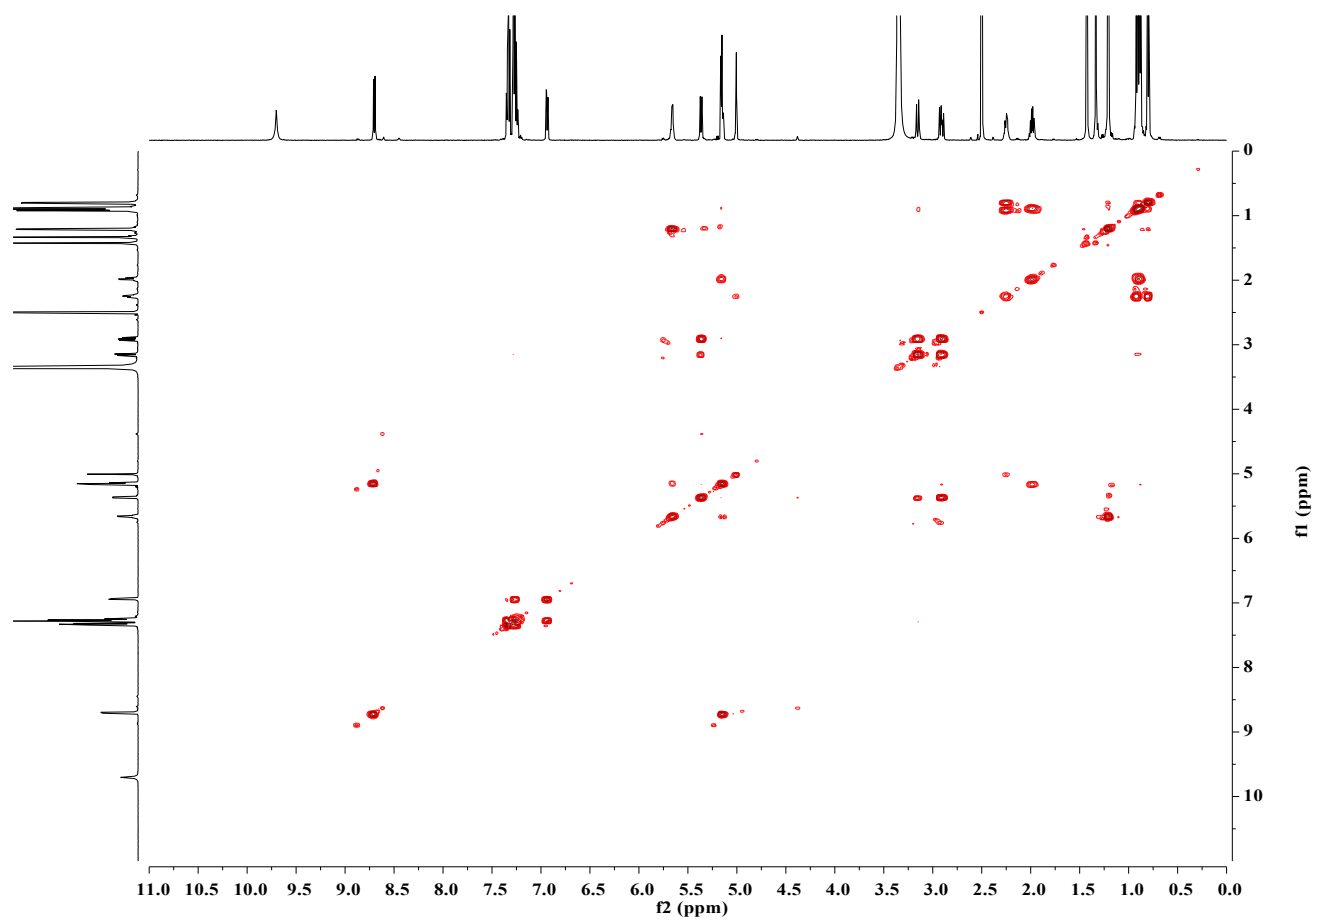

Figure S5e  $^1\text{H}$ - $^1\text{H}$  COSY spectrum of 4 in  $\text{DMSO-}d_6$

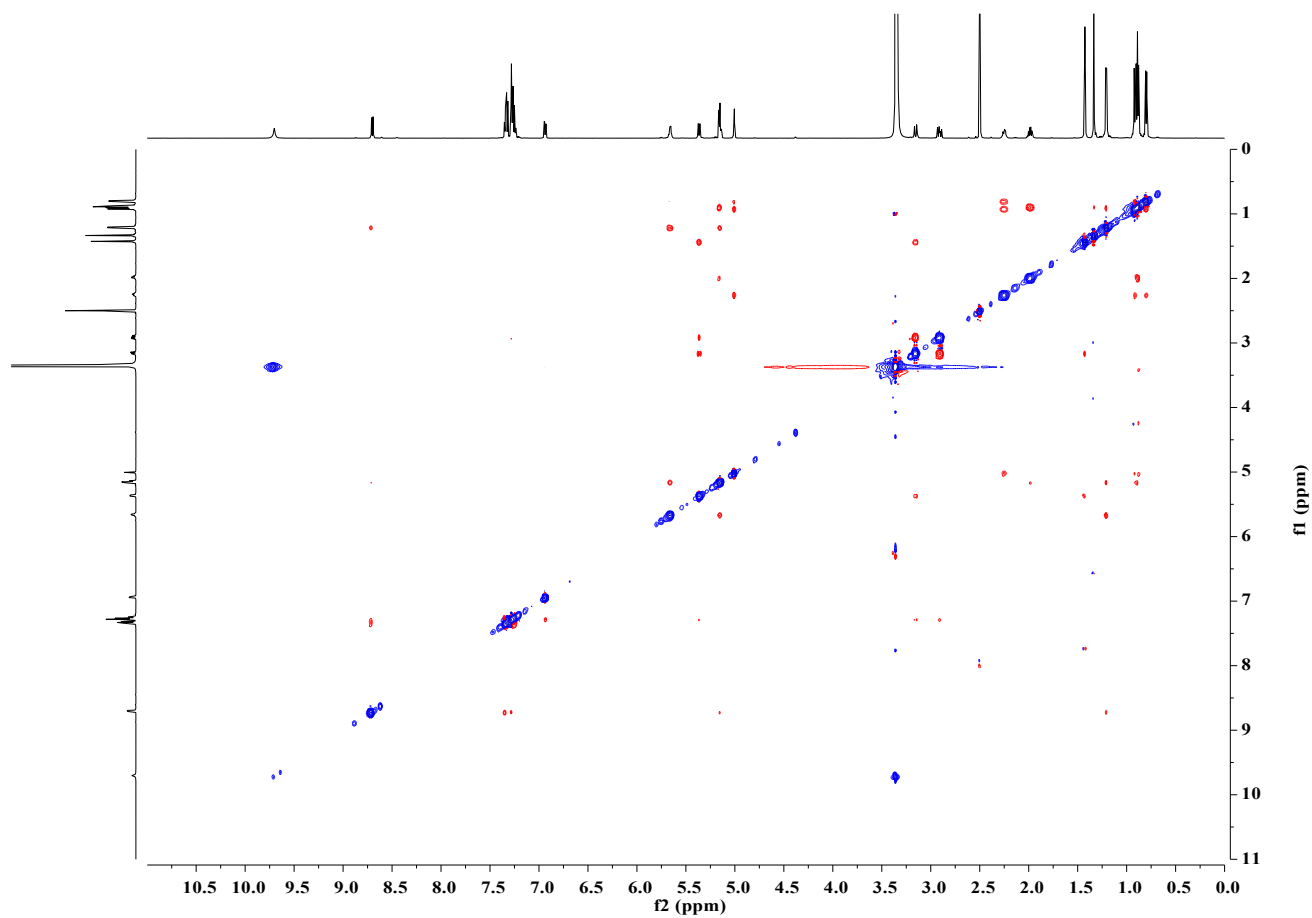

**Figure S5f** ROESY spectrum of **4** in DMSO-*d*<sub>6</sub>

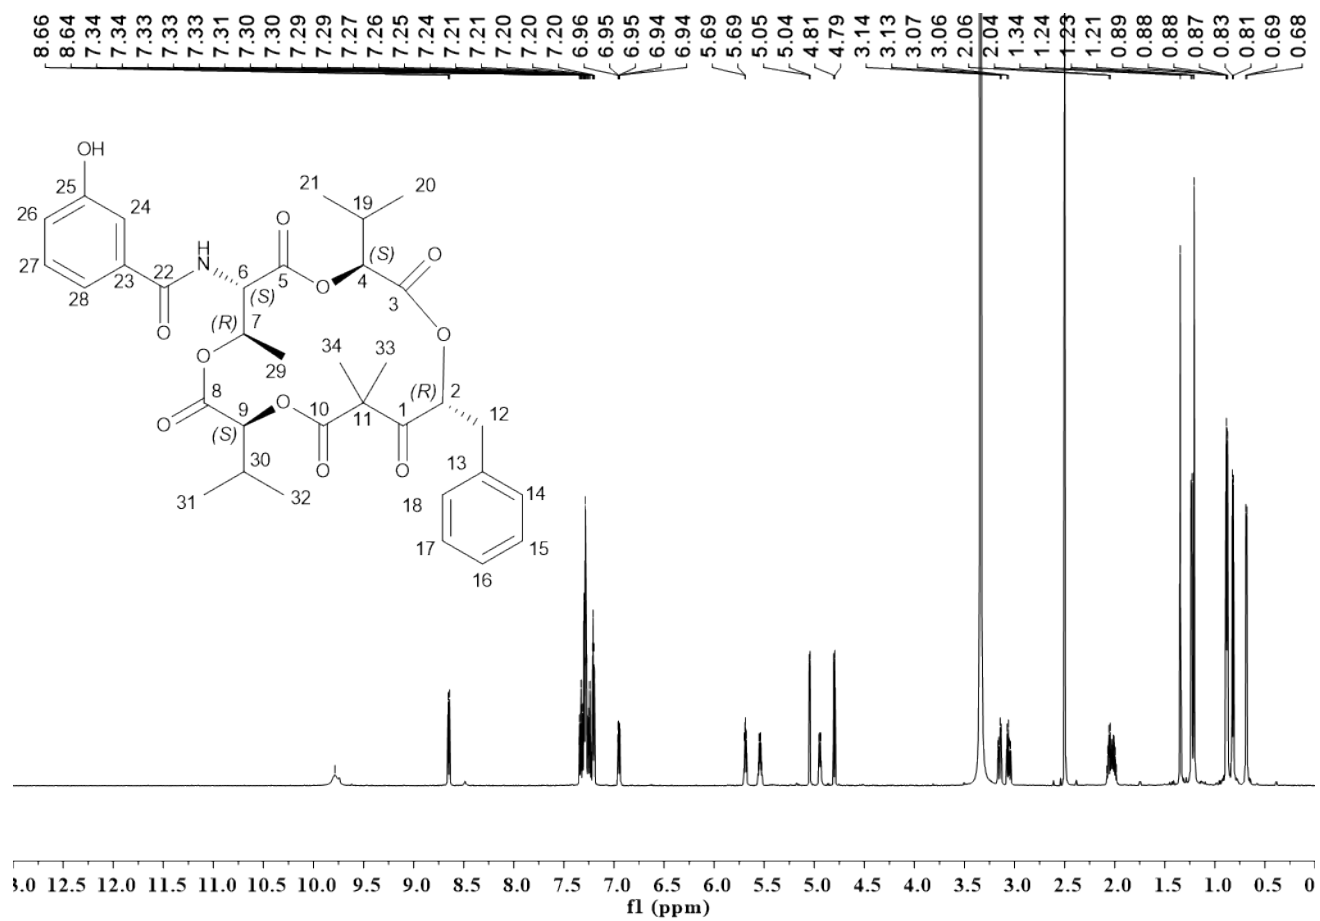

Figure S6a  $^1\text{H}$  NMR spectrum of 5 in DMSO- $d_6$

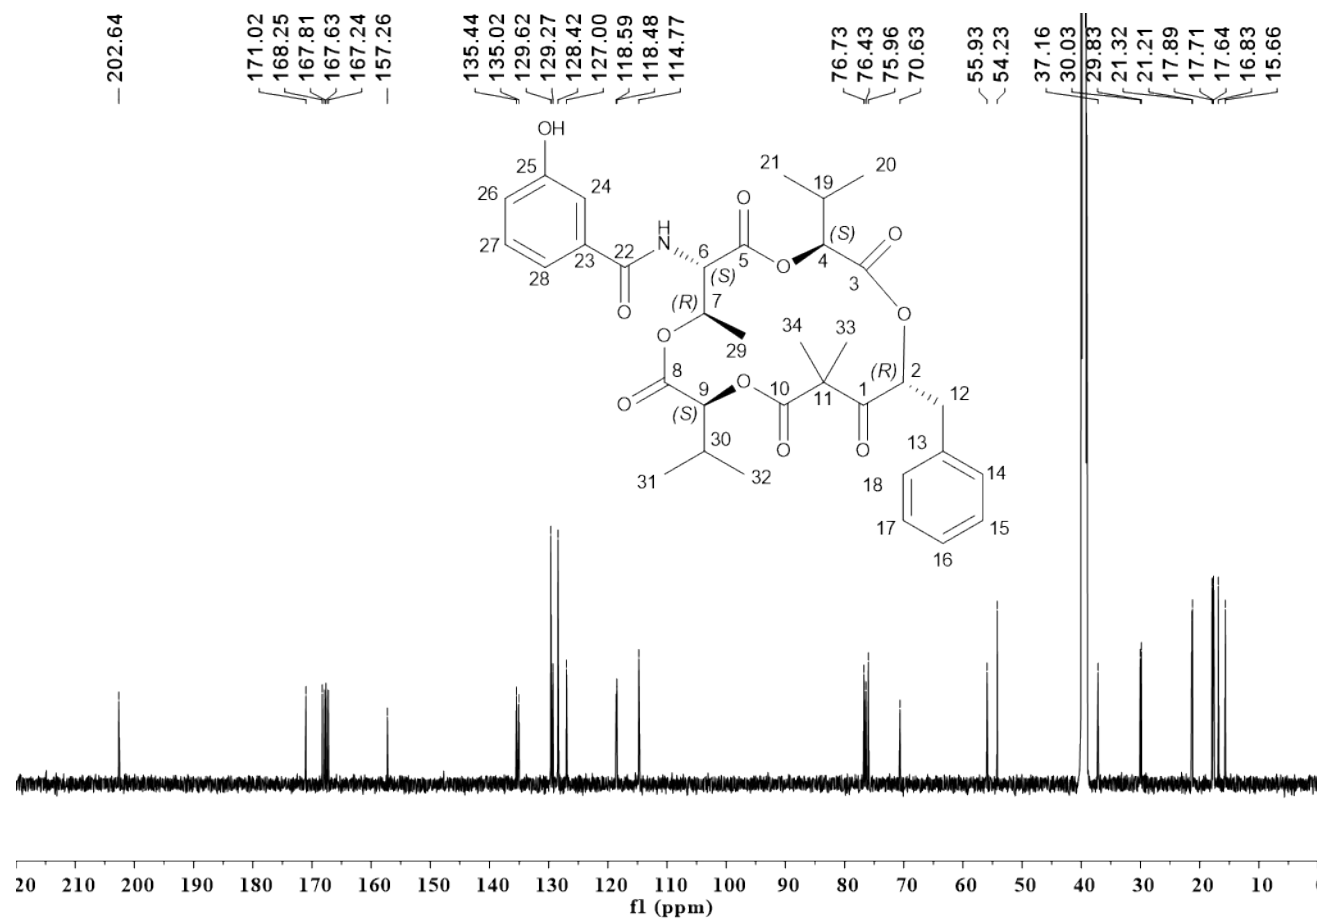

Figure S6b  $^{13}\text{C}$  NMR spectrum of 5 in  $\text{DMSO-}d_6$

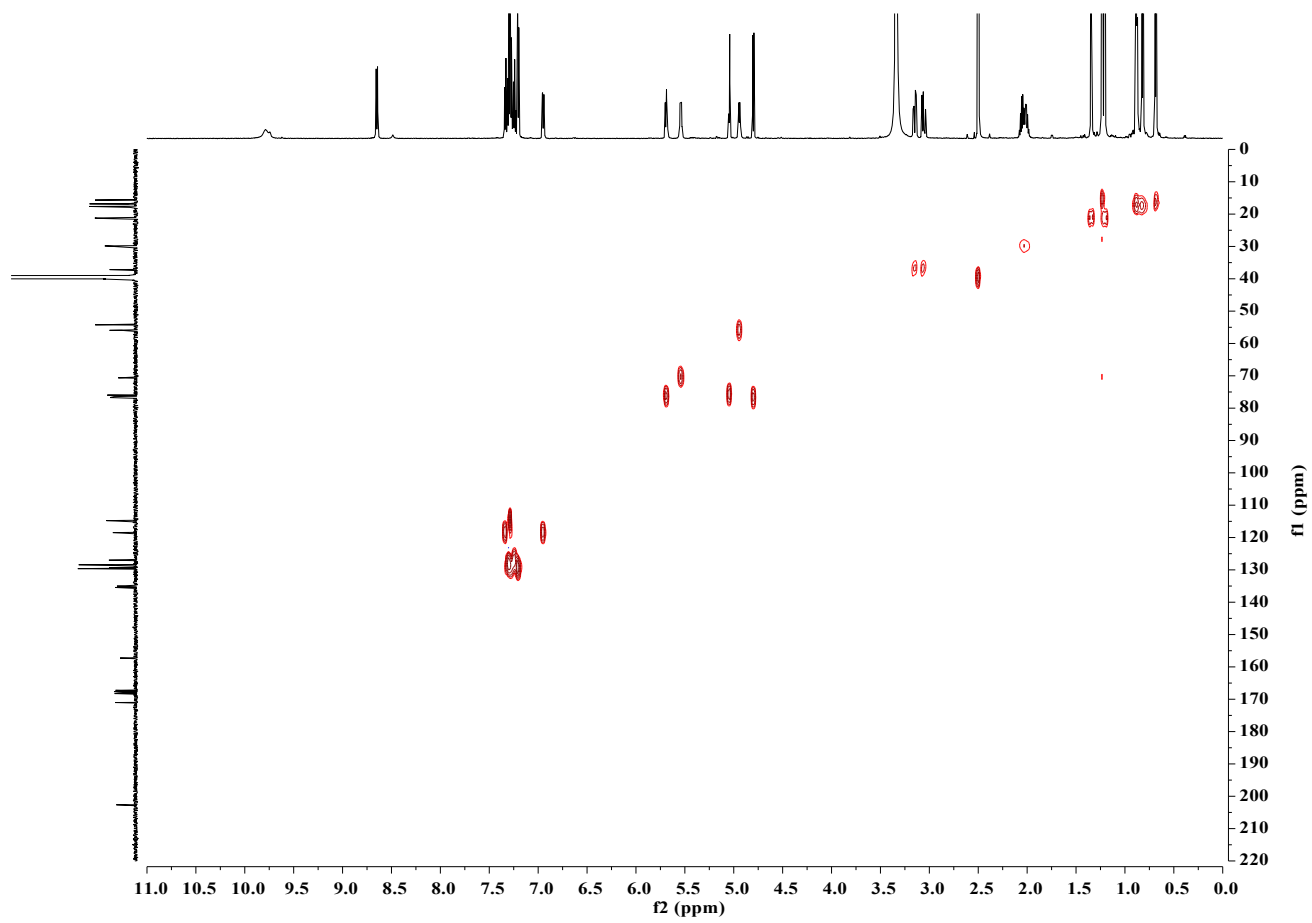

Figure S6c HSQC spectrum of 5 in DMSO- $d_6$

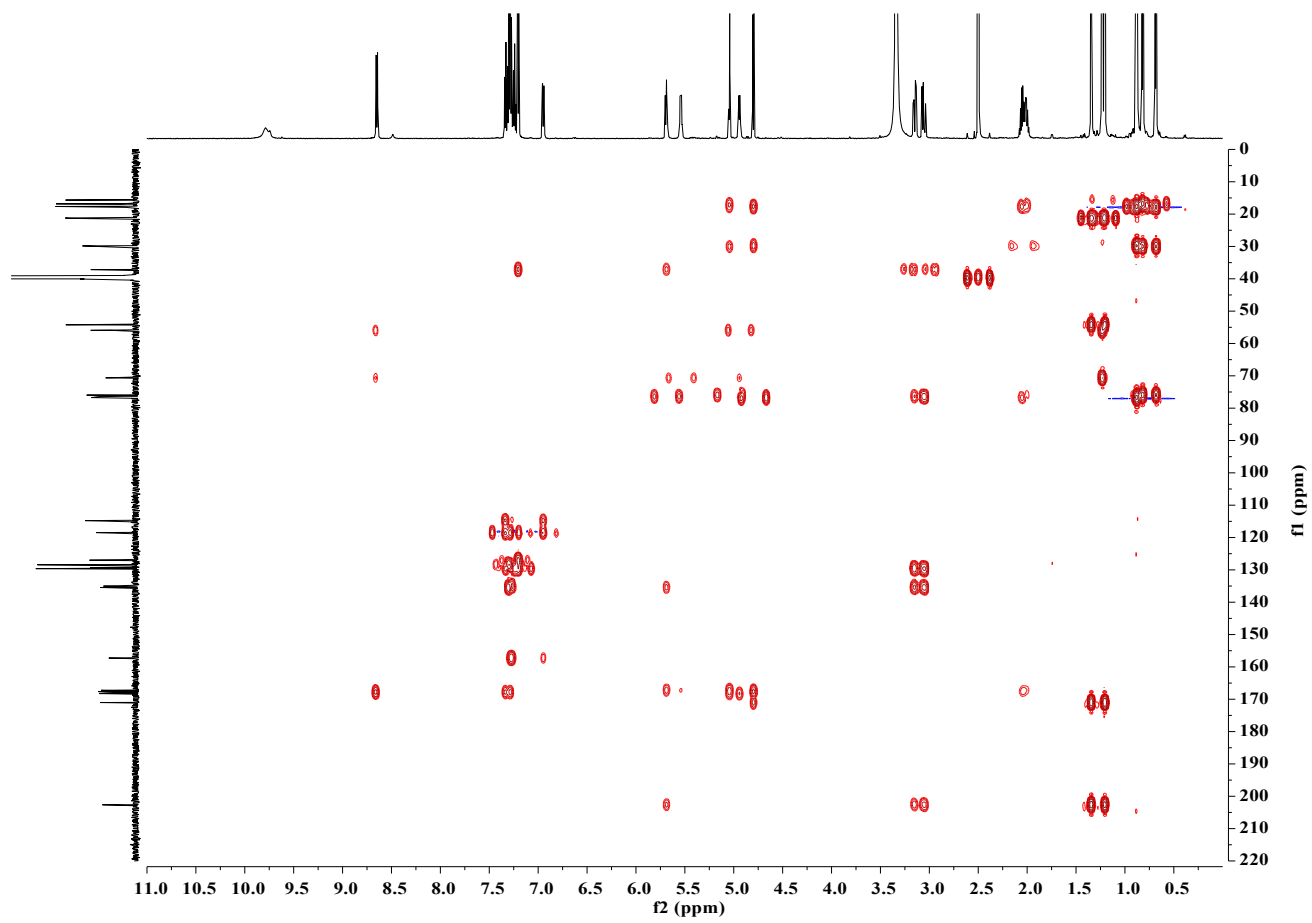

Figure S6d HMBC spectrum of **5** in  $\text{DMSO-}d_6$



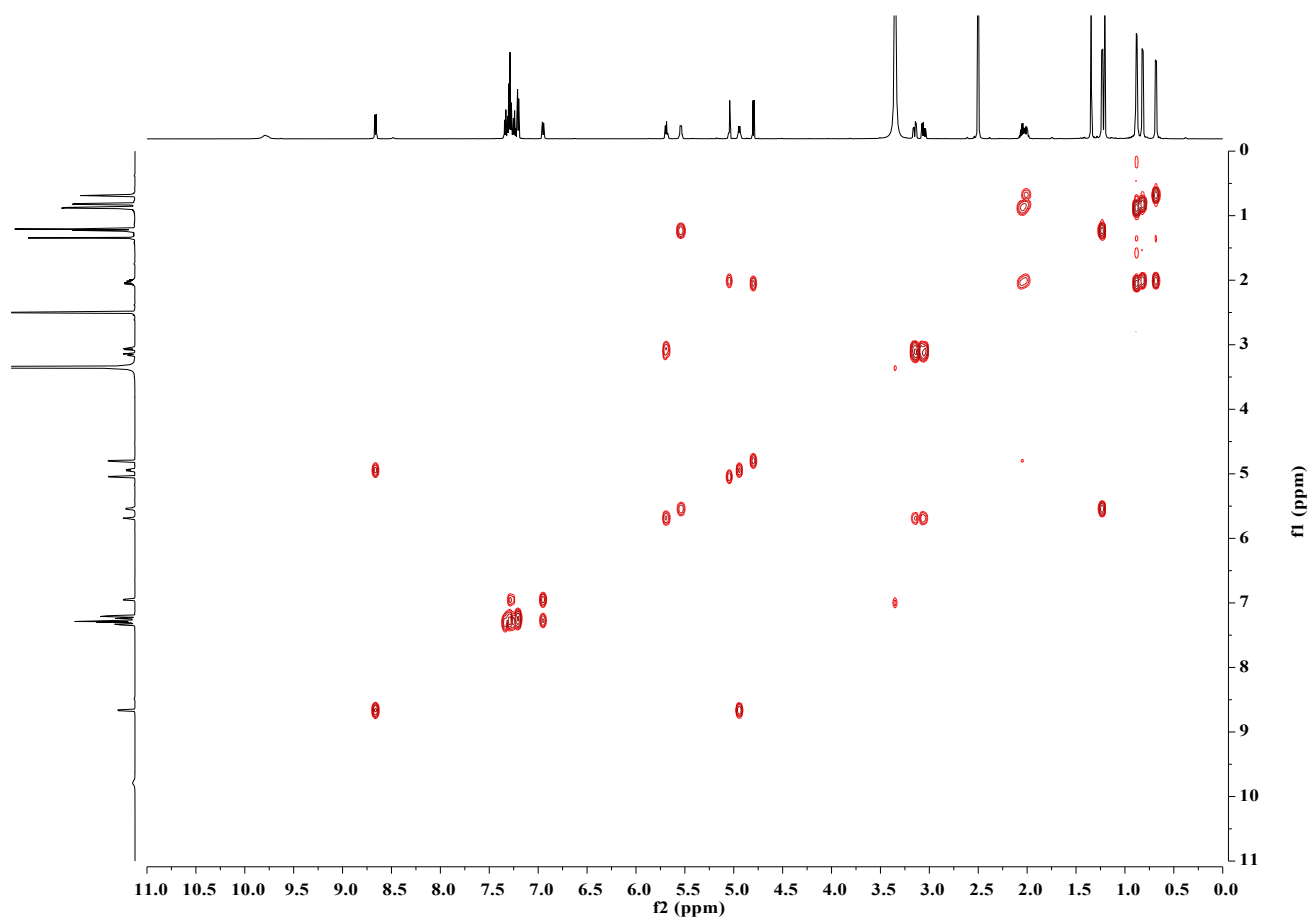

Figure S6e  $^1\text{H}$ - $^1\text{H}$  COSY spectrum of 5 in  $\text{DMSO-}d_6$

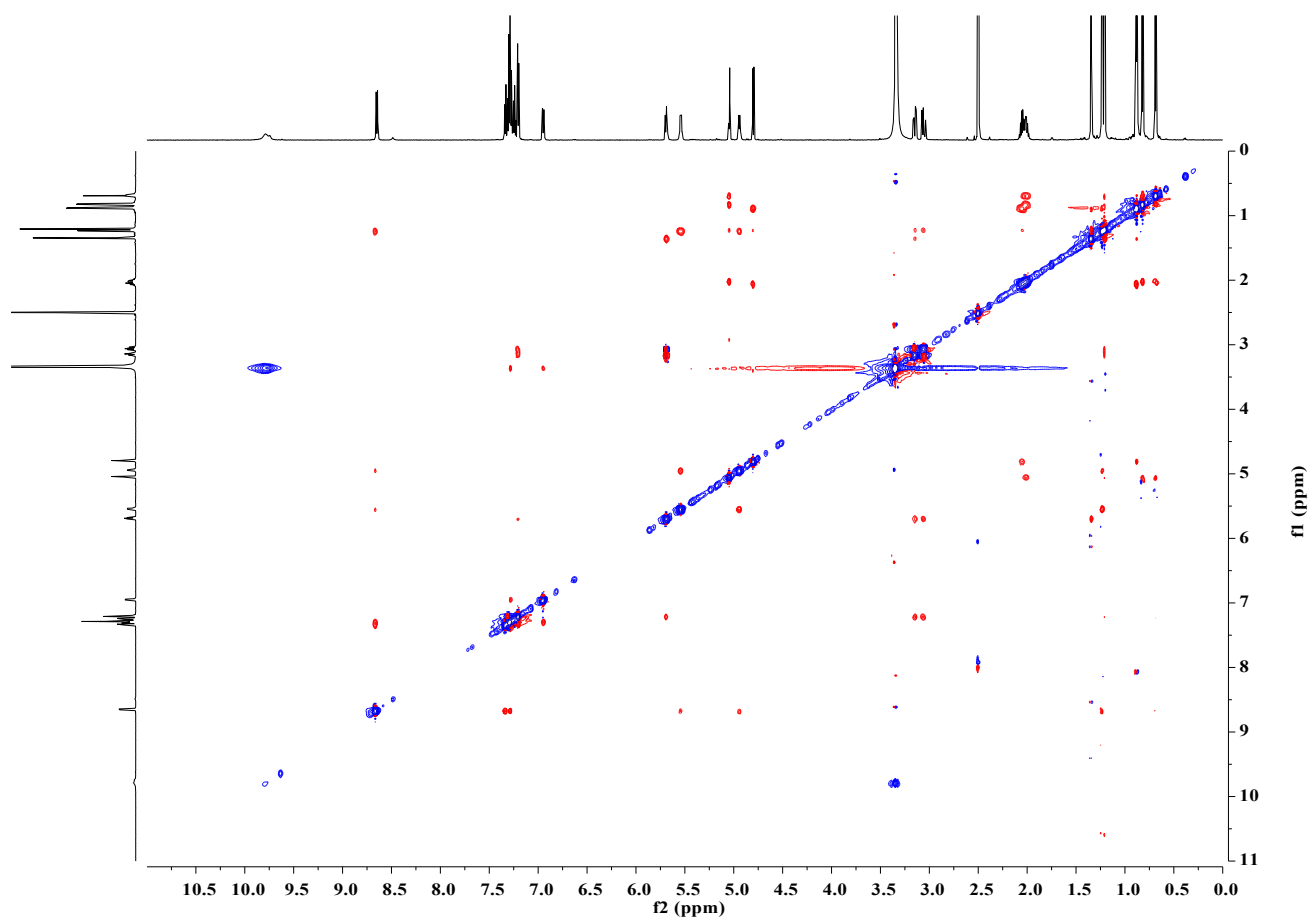

Figure S6f ROESY spectrum of 5 in DMSO-*d*<sub>6</sub>

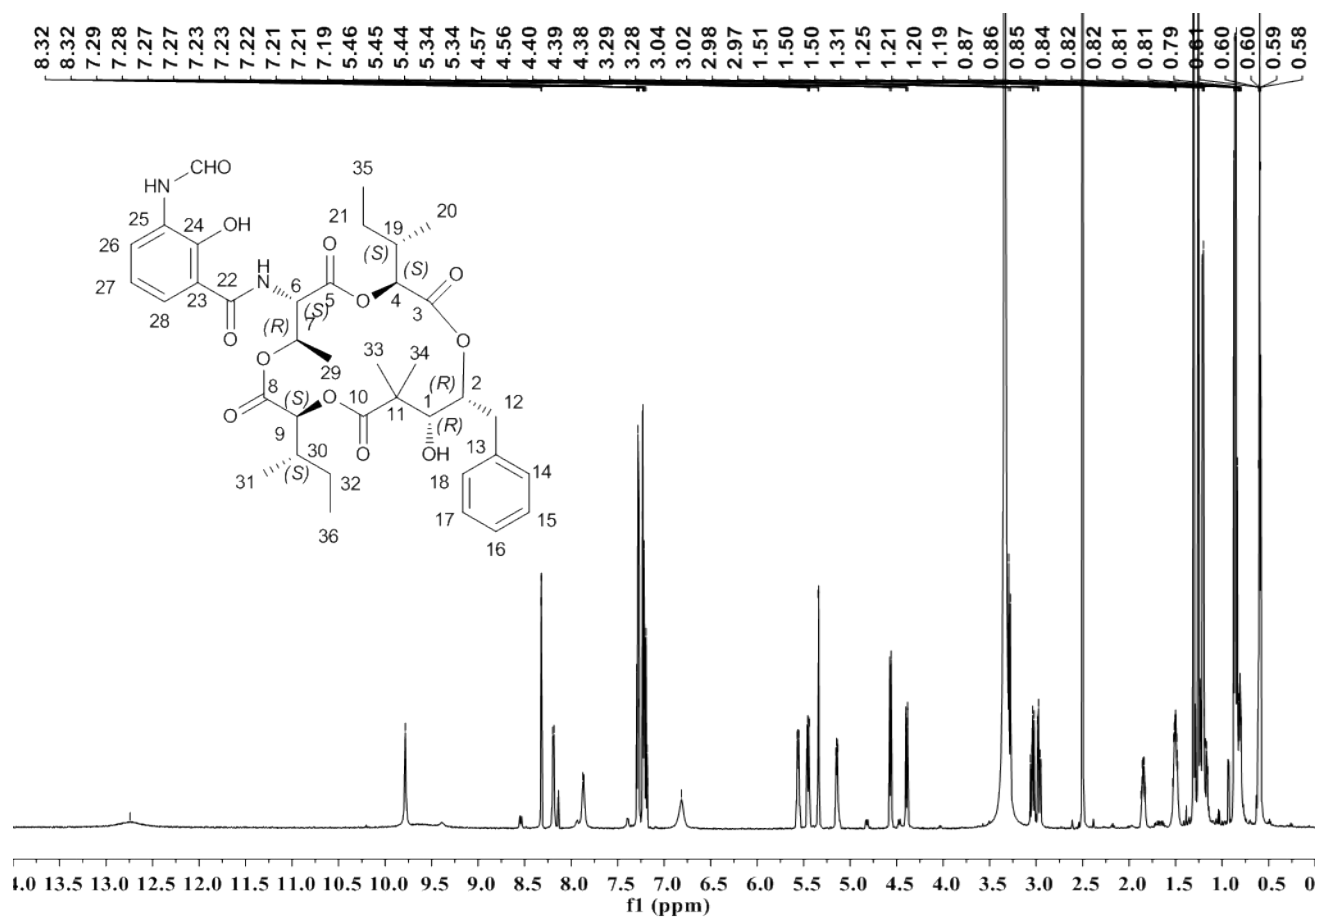

Figure S7a  $^1\text{H}$  NMR spectrum of **6** in  $\text{DMSO-}d_6$

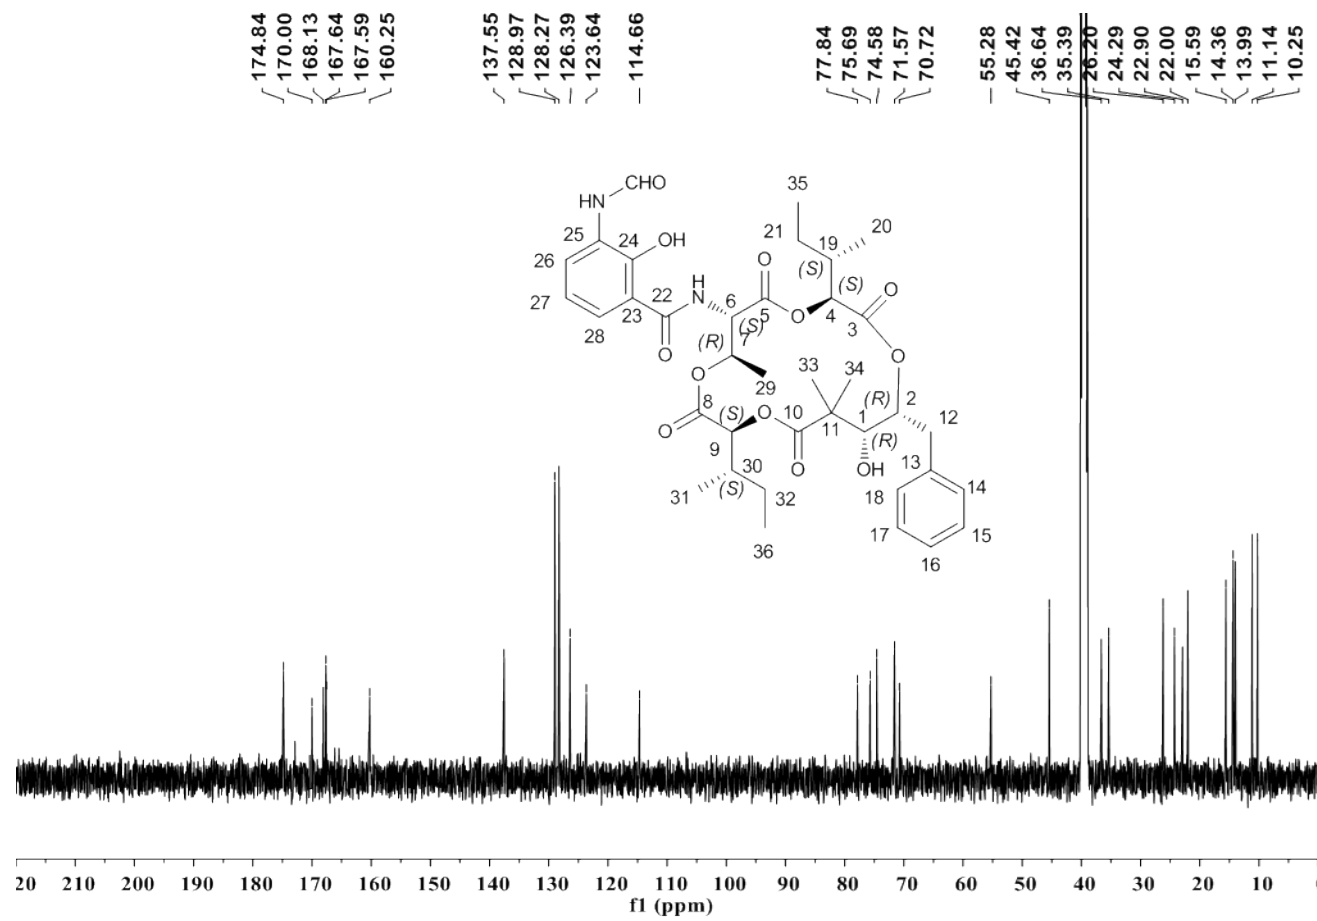

Figure S7b <sup>13</sup>C NMR spectrum of 6 in DMSO-*d*

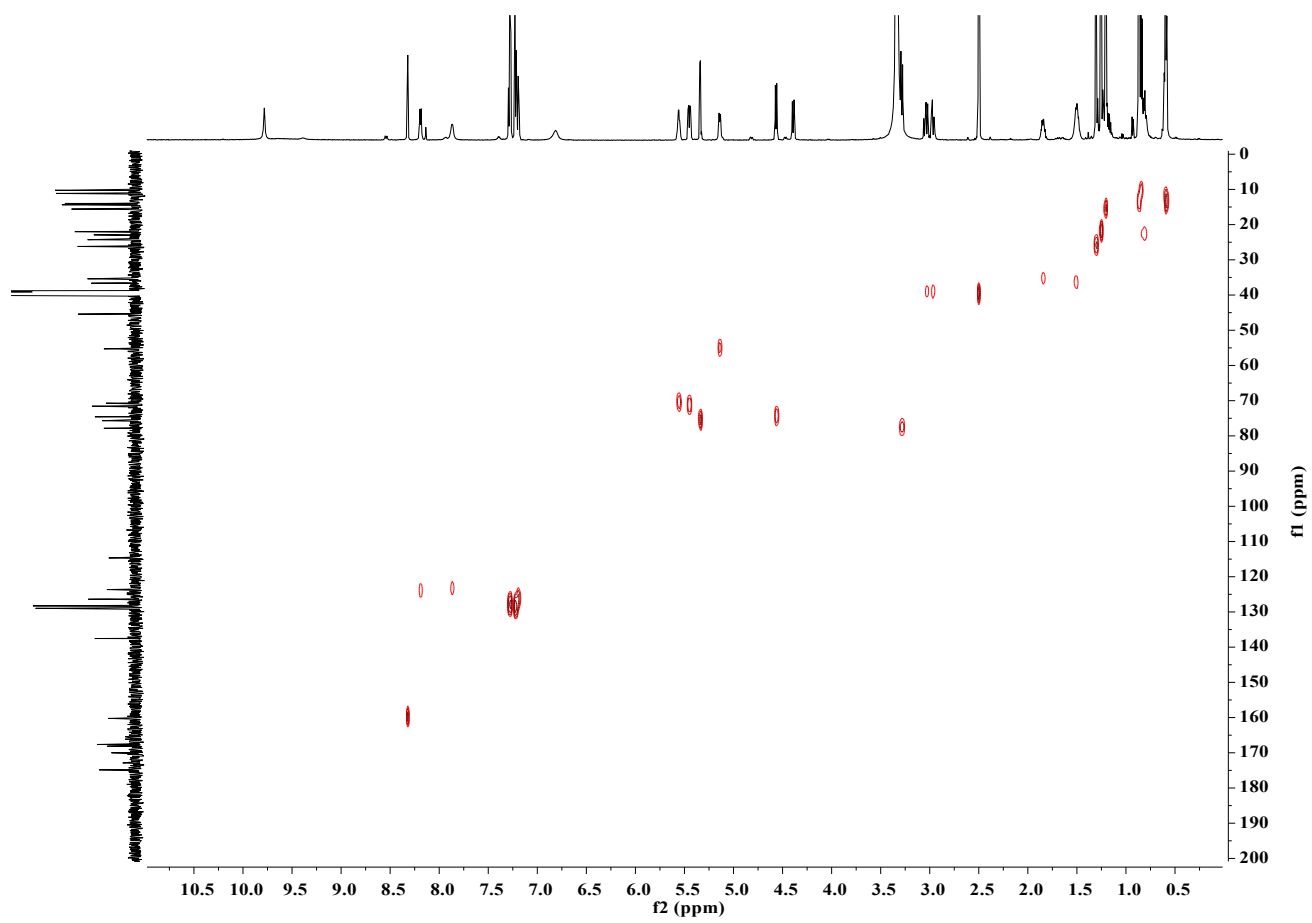

Figure S7c HSQC spectrum of 6 in DMSO-*d*<sub>6</sub>

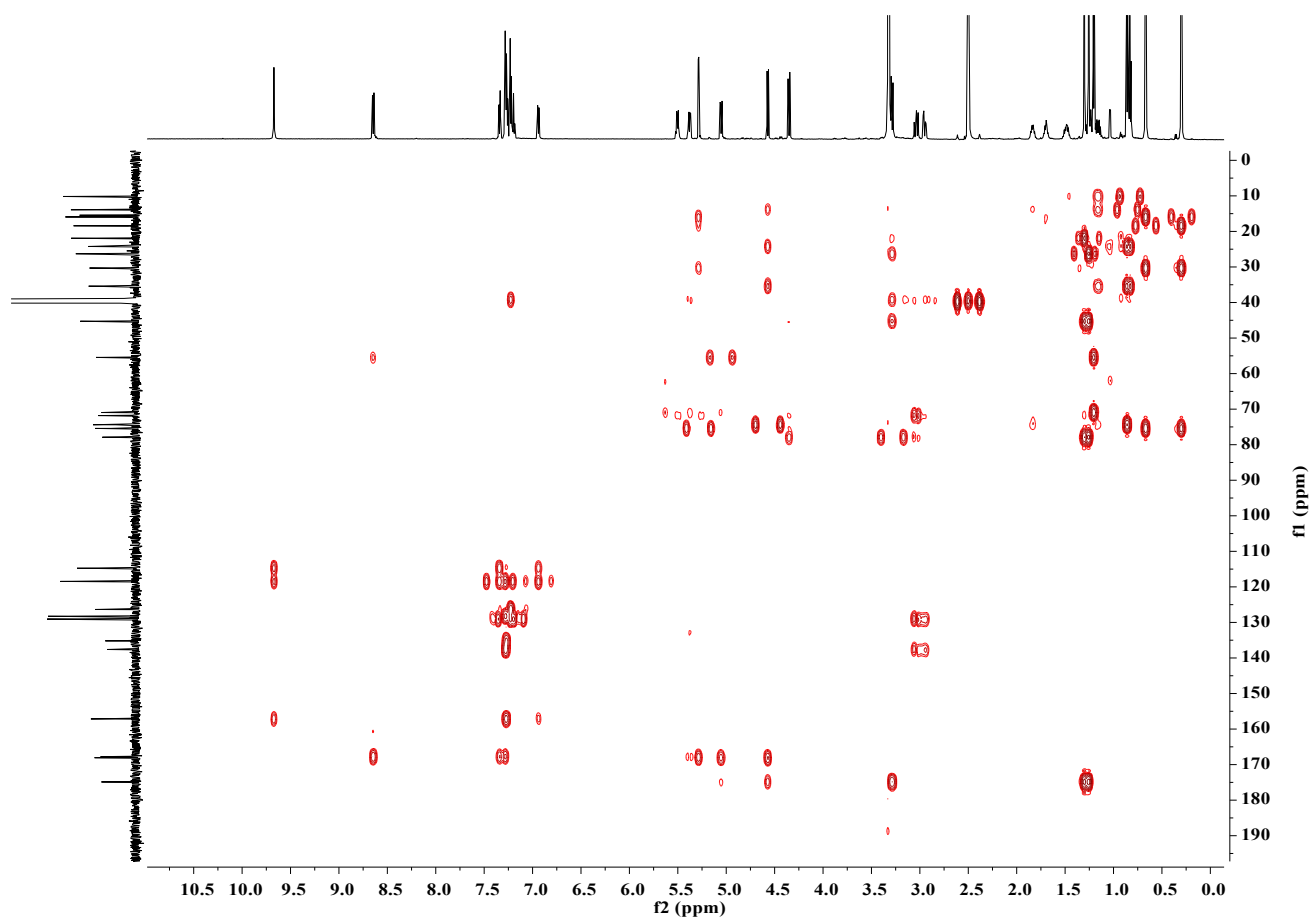

Figure S7d HMBC spectrum of 6 in  $\text{DMSO-}d_6$

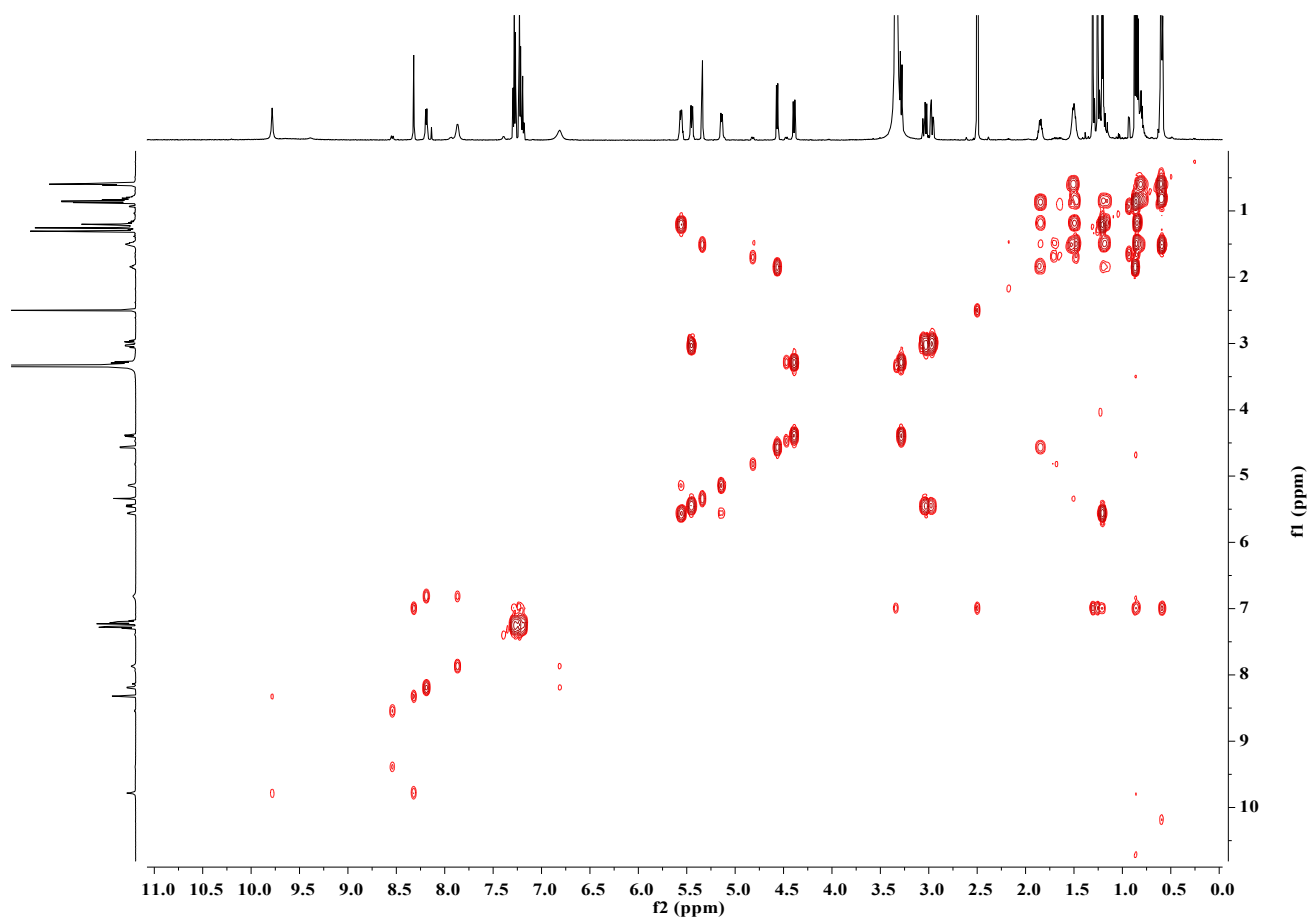

Figure S7e  $^1\text{H}$ - $^1\text{H}$  COSY spectrum of **6** in  $\text{DMSO-}d_6$

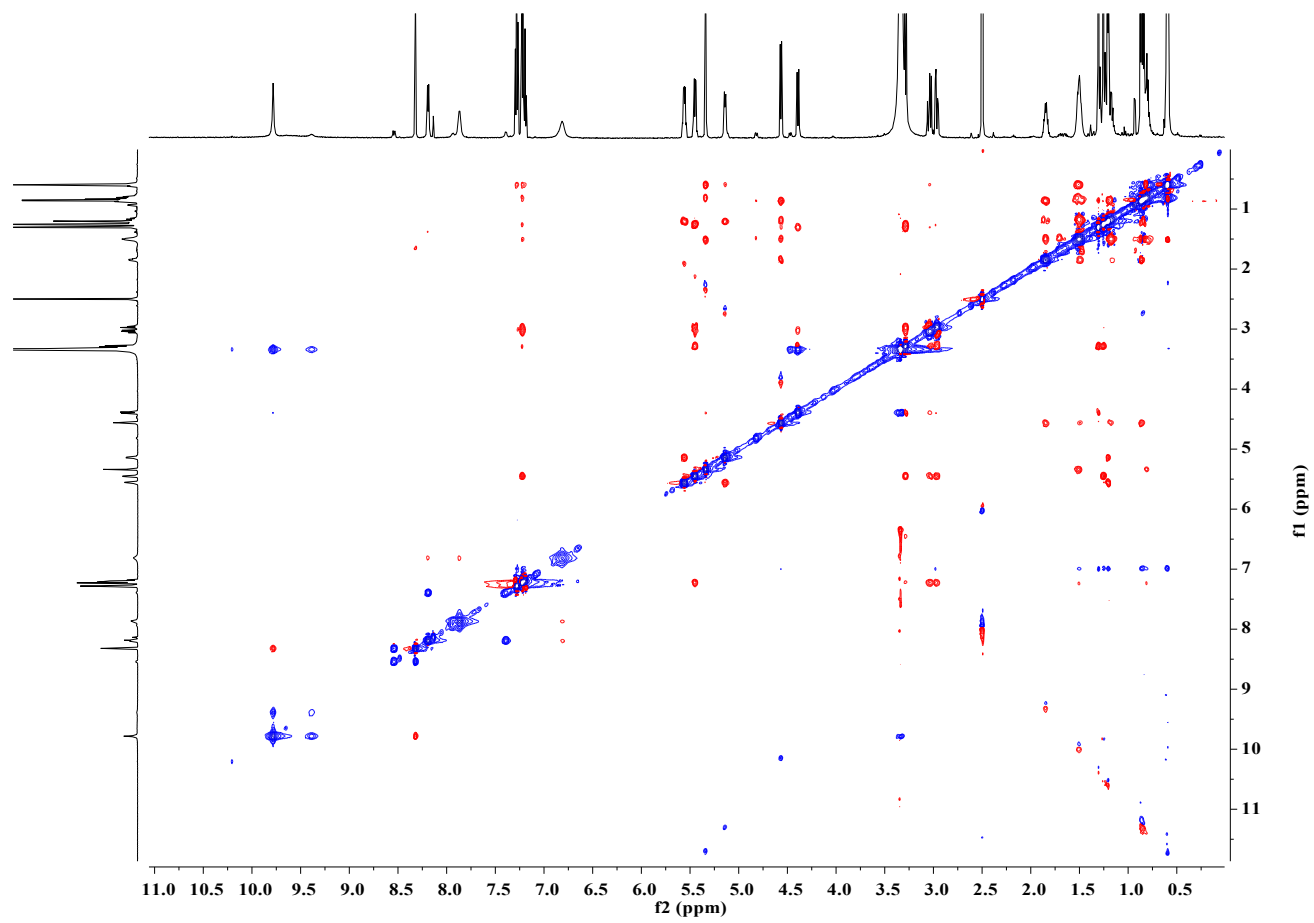

Figure S7f ROESY spectrum of 6 in DMSO- $d_6$



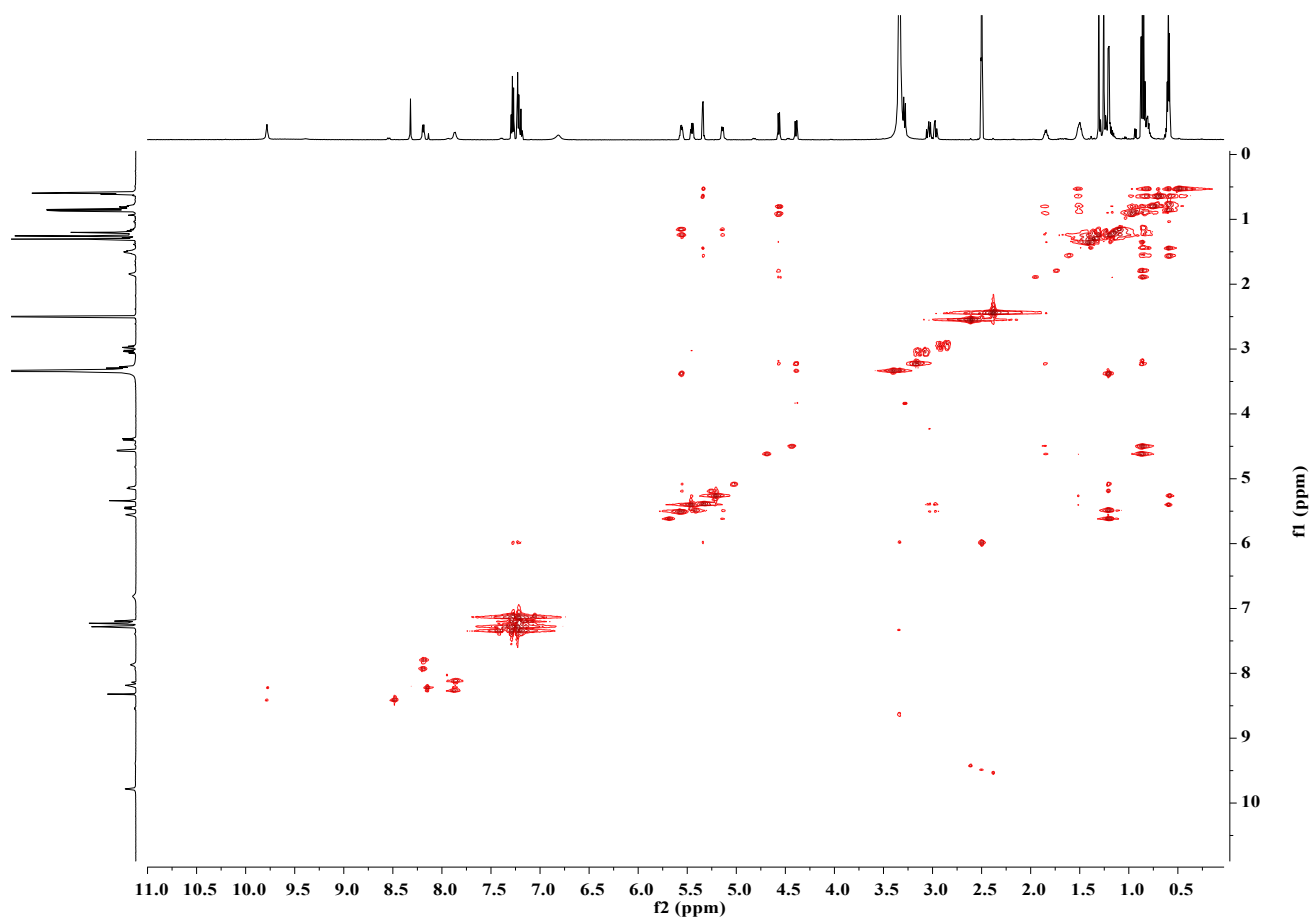

**Figure S7g** HETLOC spectrum of 6 in DMSO- $d_6$



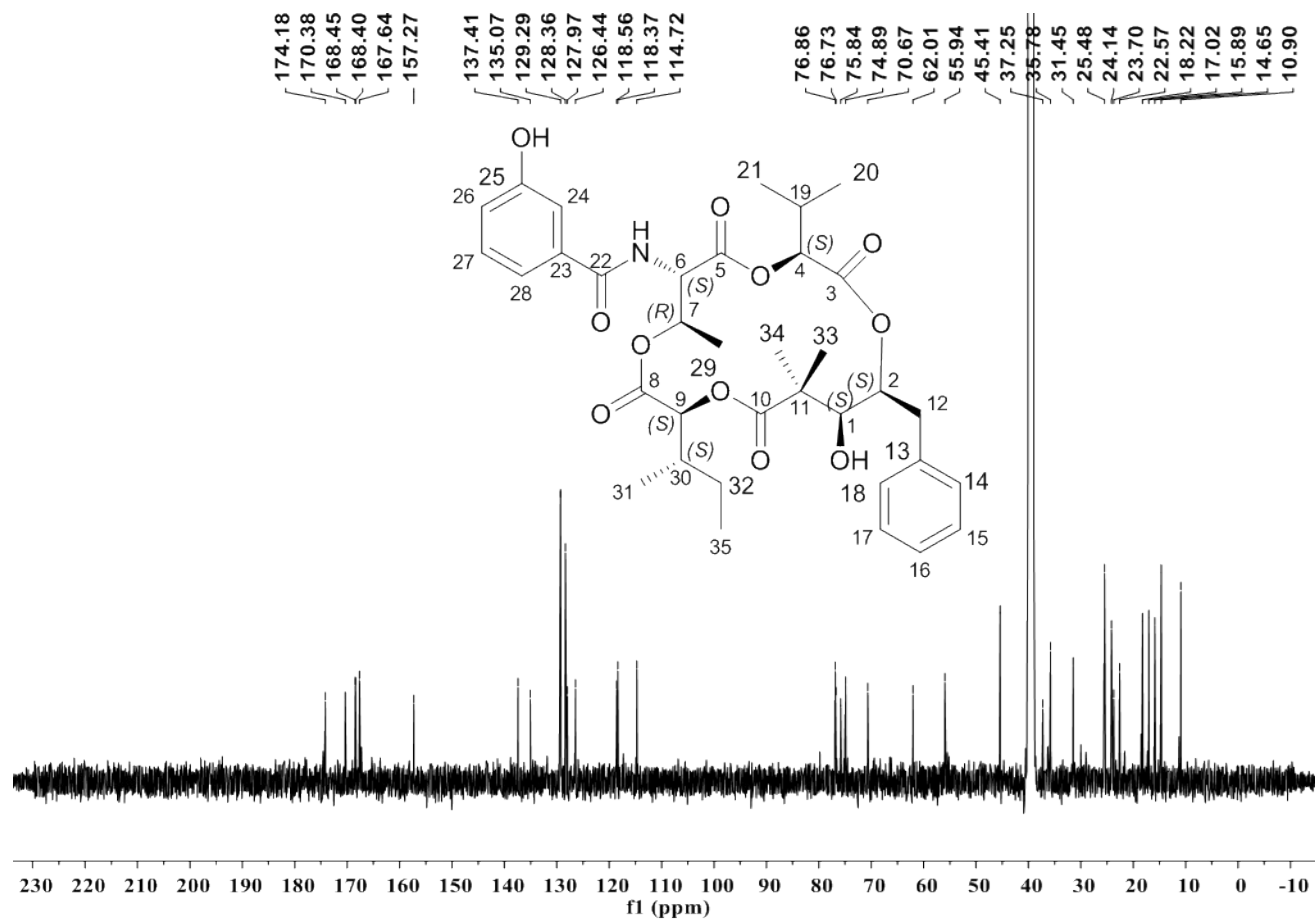

Figure S8b <sup>13</sup>C NMR spectrum of 7 in DMSO-*d*<sub>6</sub>

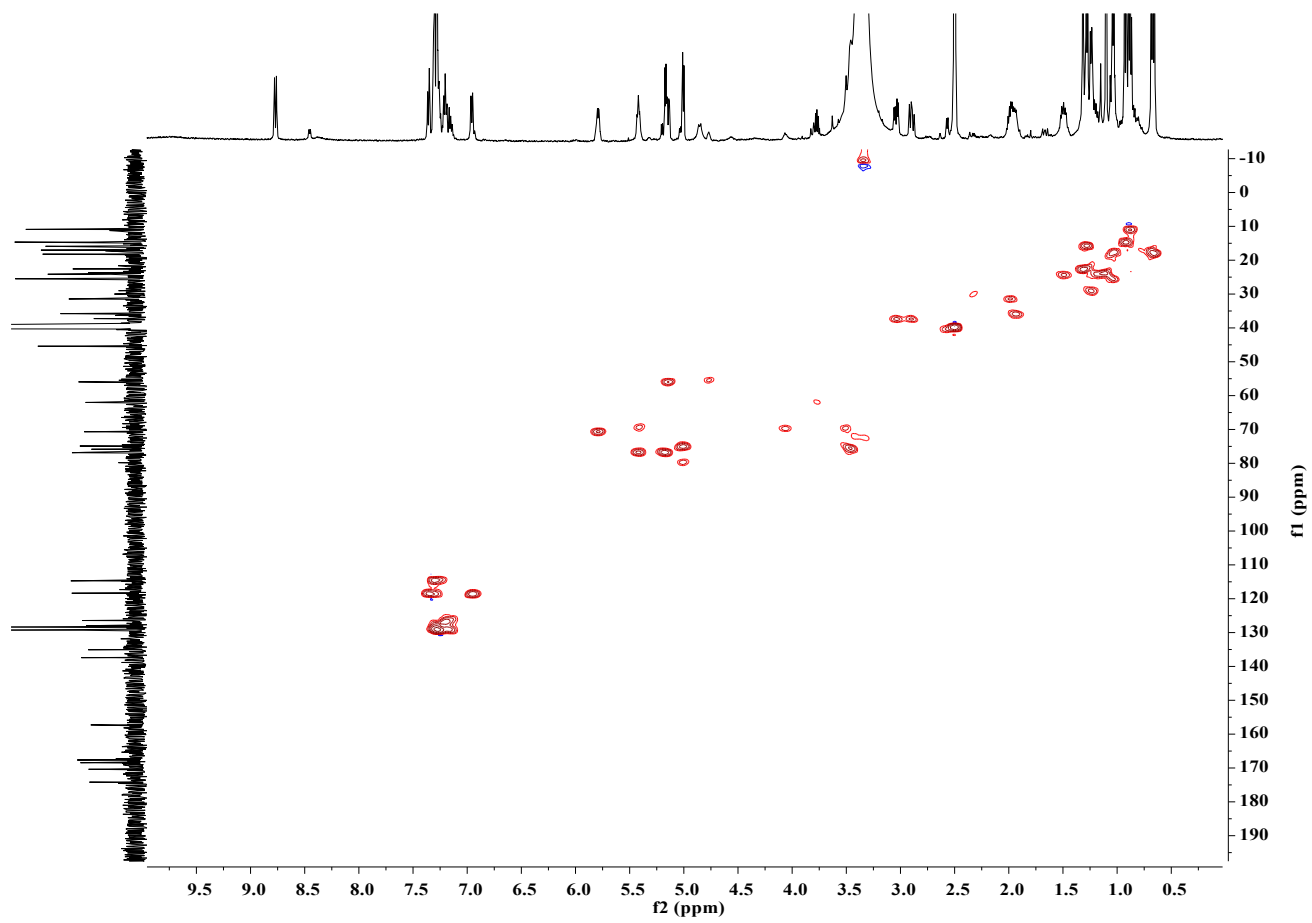

Figure S8c HSQC spectrum of 7 in  $\text{DMSO-}d_6$

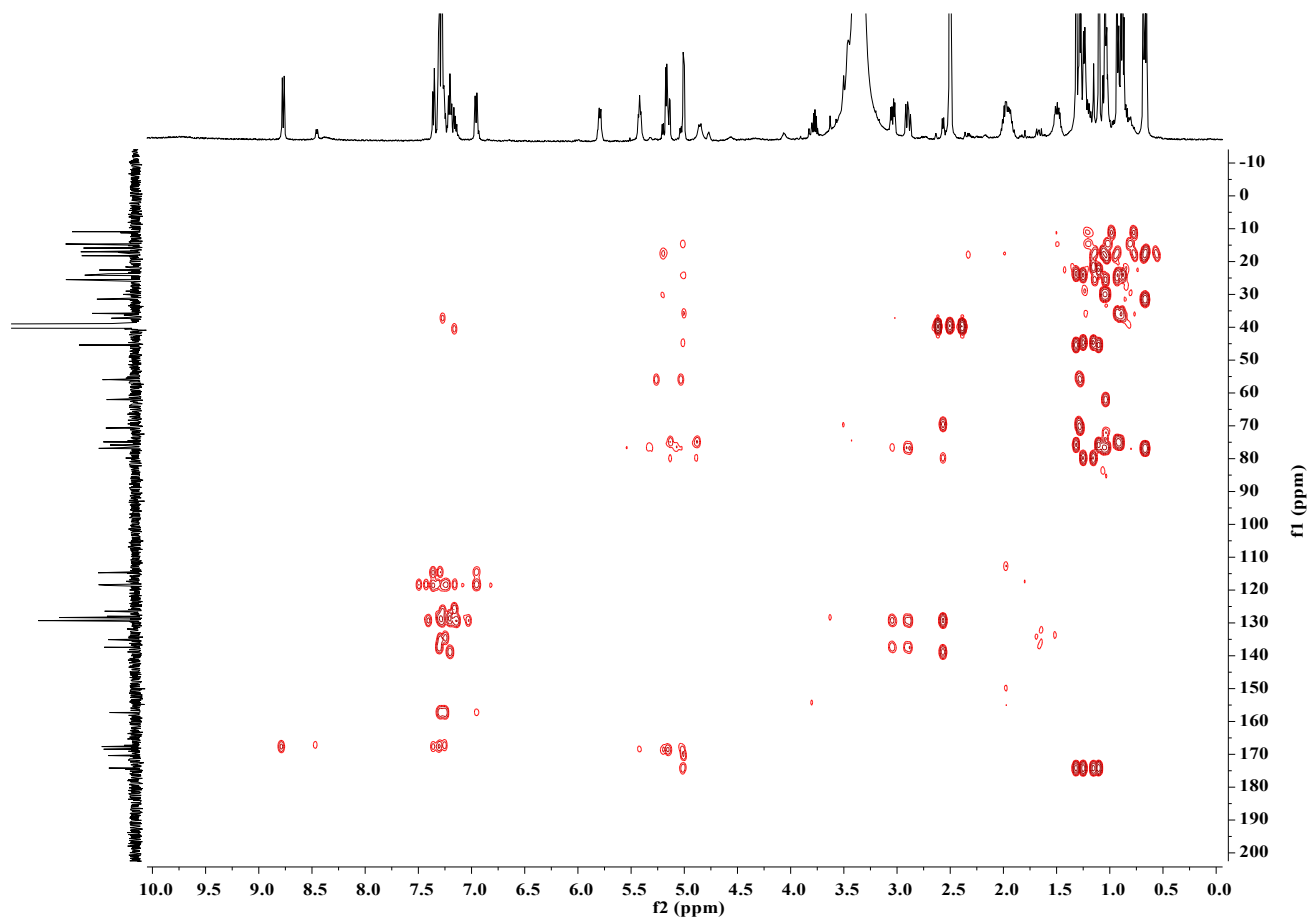

Figure S8d HMBC spectrum of **7** in DMSO-*d*<sub>6</sub>

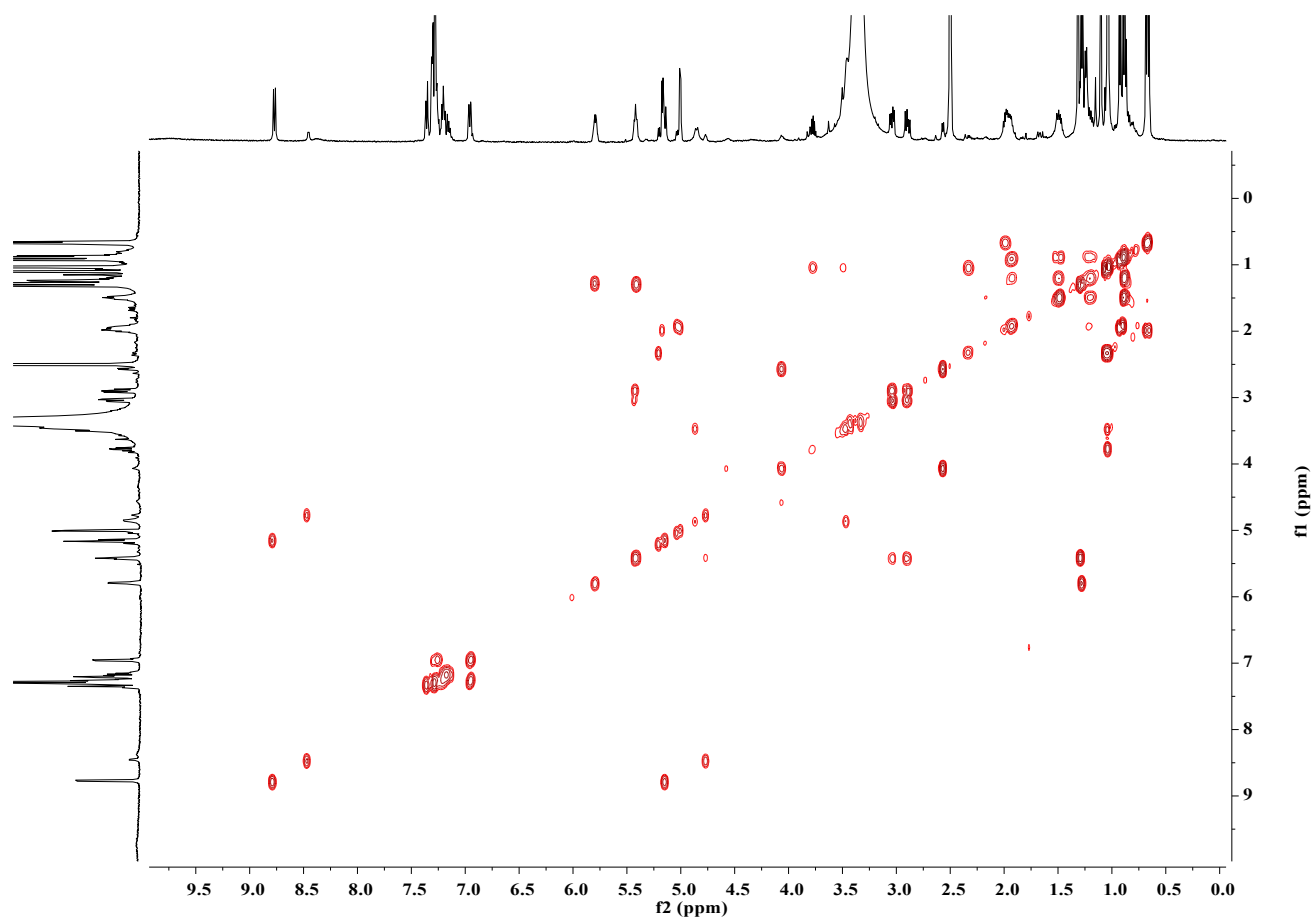

Figure S8e  $^1\text{H}$ - $^1\text{H}$  COSY spectrum of 7 in  $\text{DMSO-}d_6$

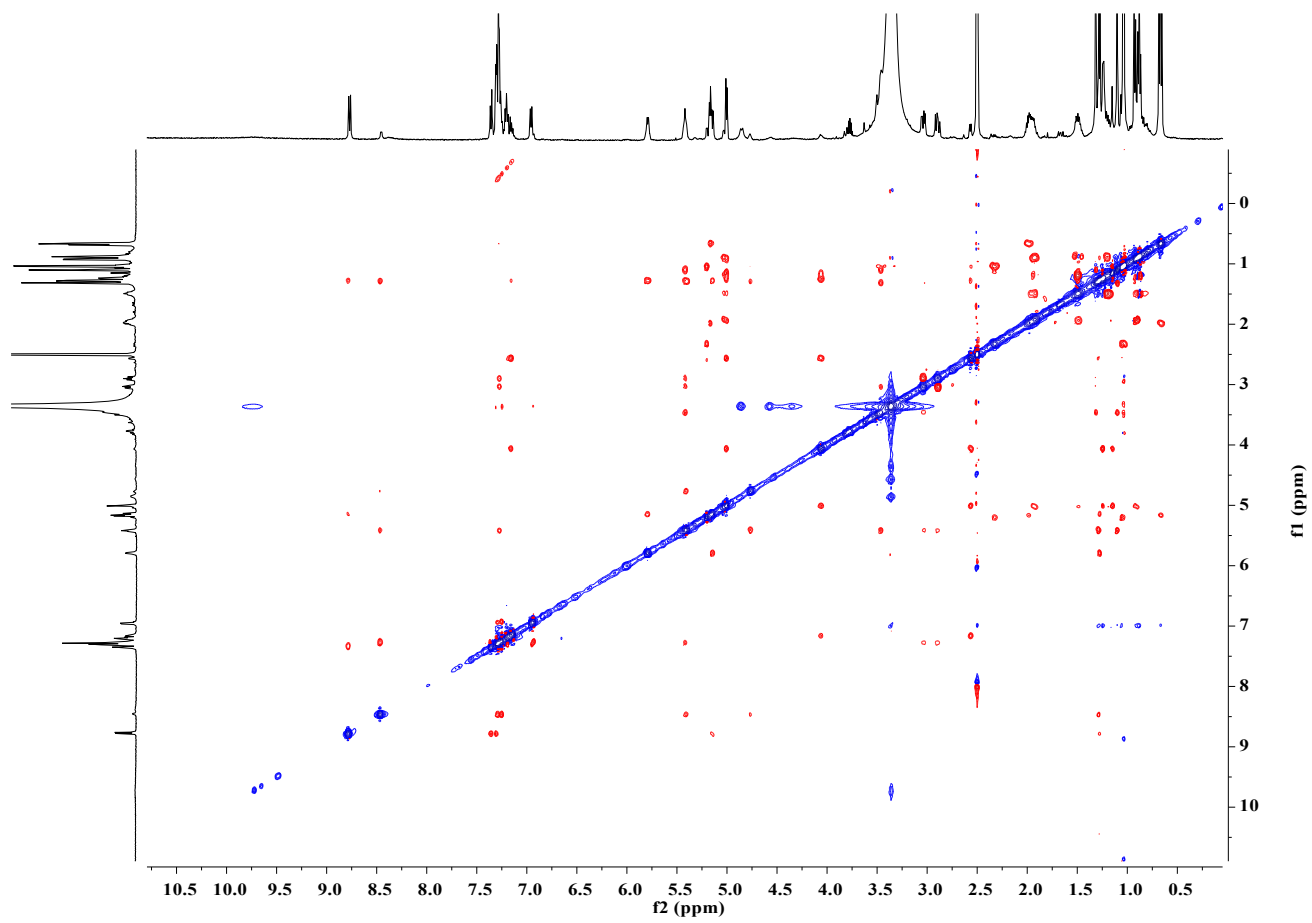

Figure S8f ROESY spectrum of 7 in DMSO- $d_6$

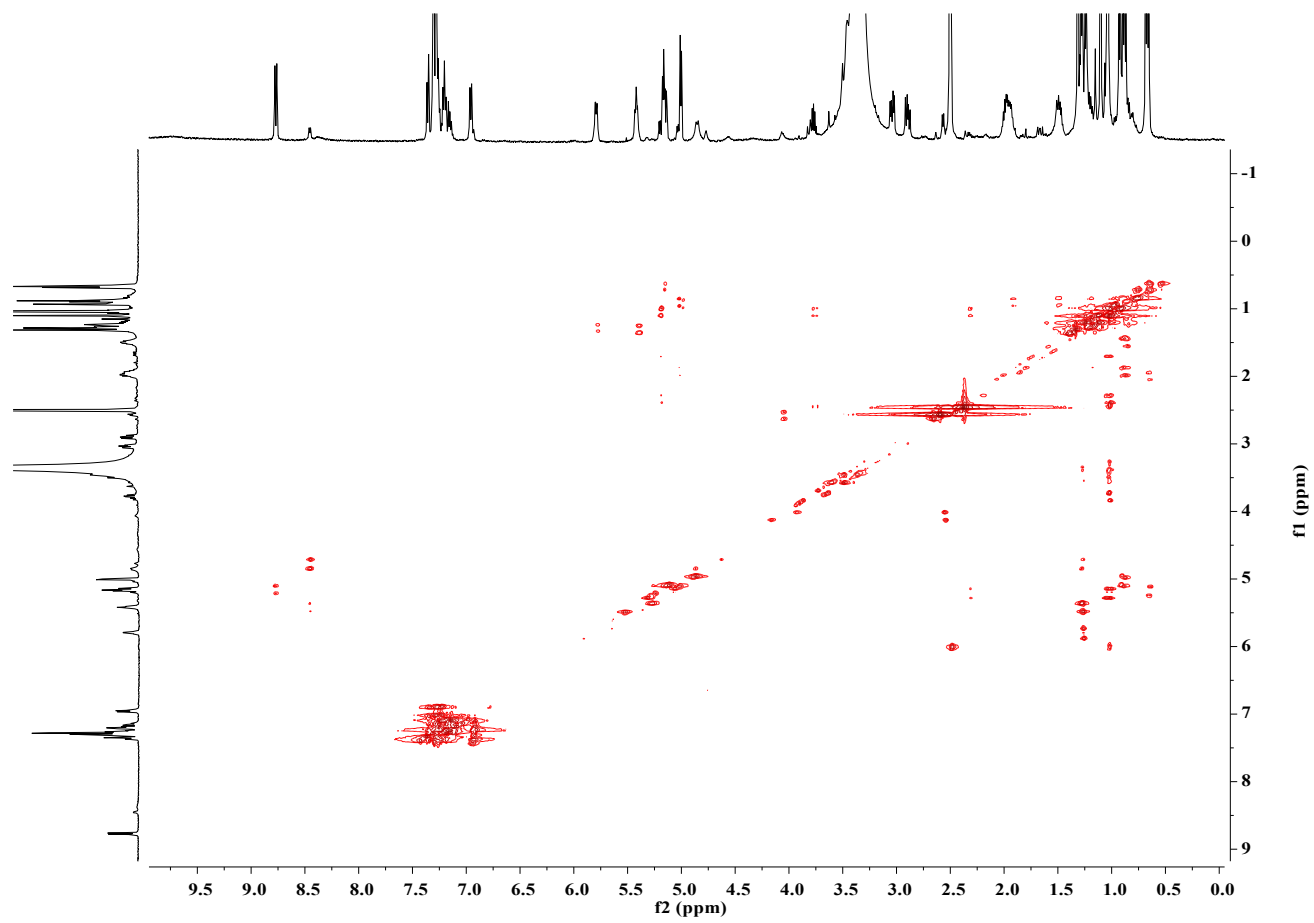

Figure S8g HETLOC spectrum of 7 in DMSO- $d_6$



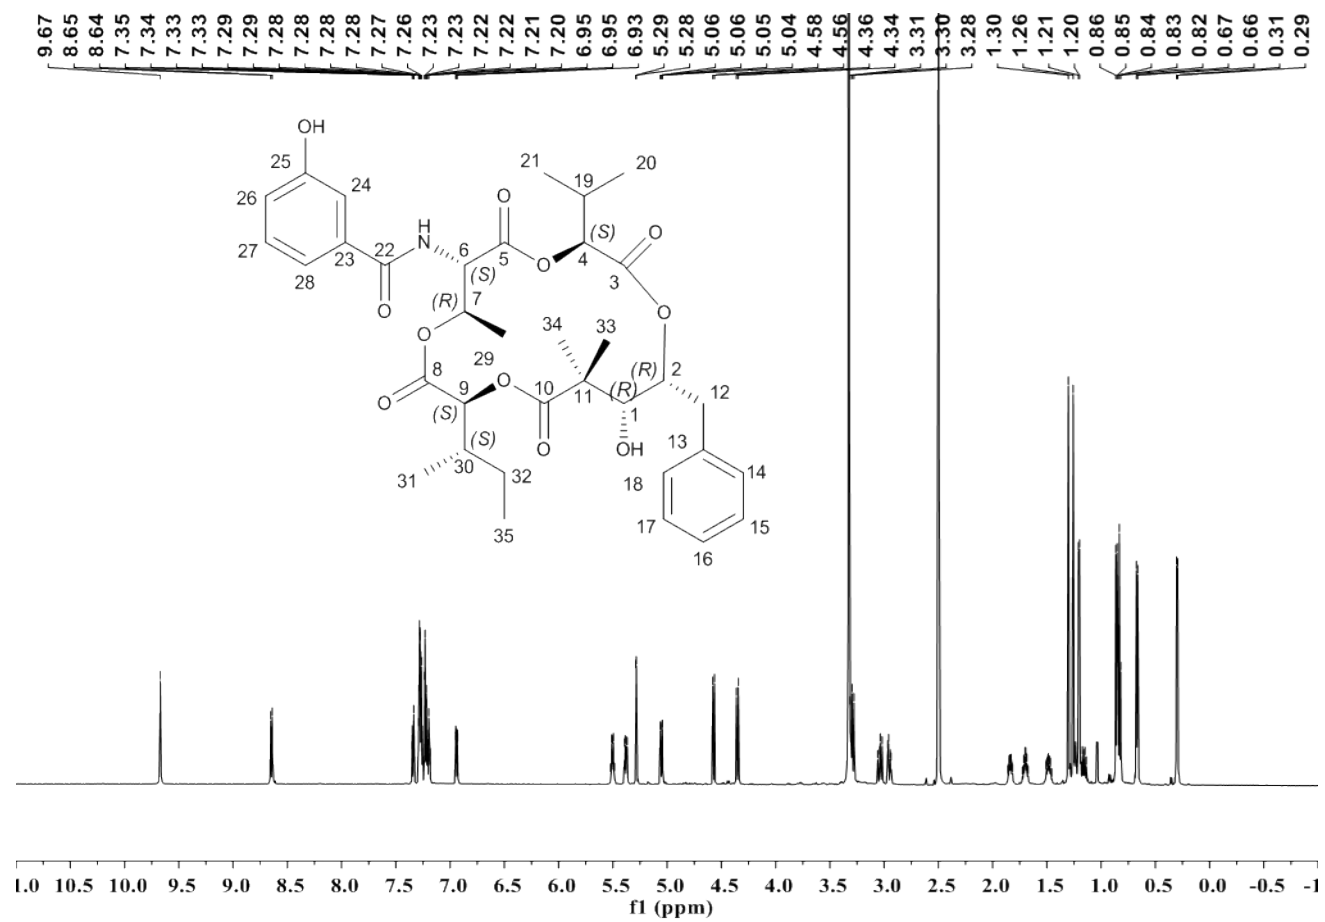

Figure S9a  $^1\text{H}$  NMR spectrum of 8 in  $\text{DMSO-}d_6$

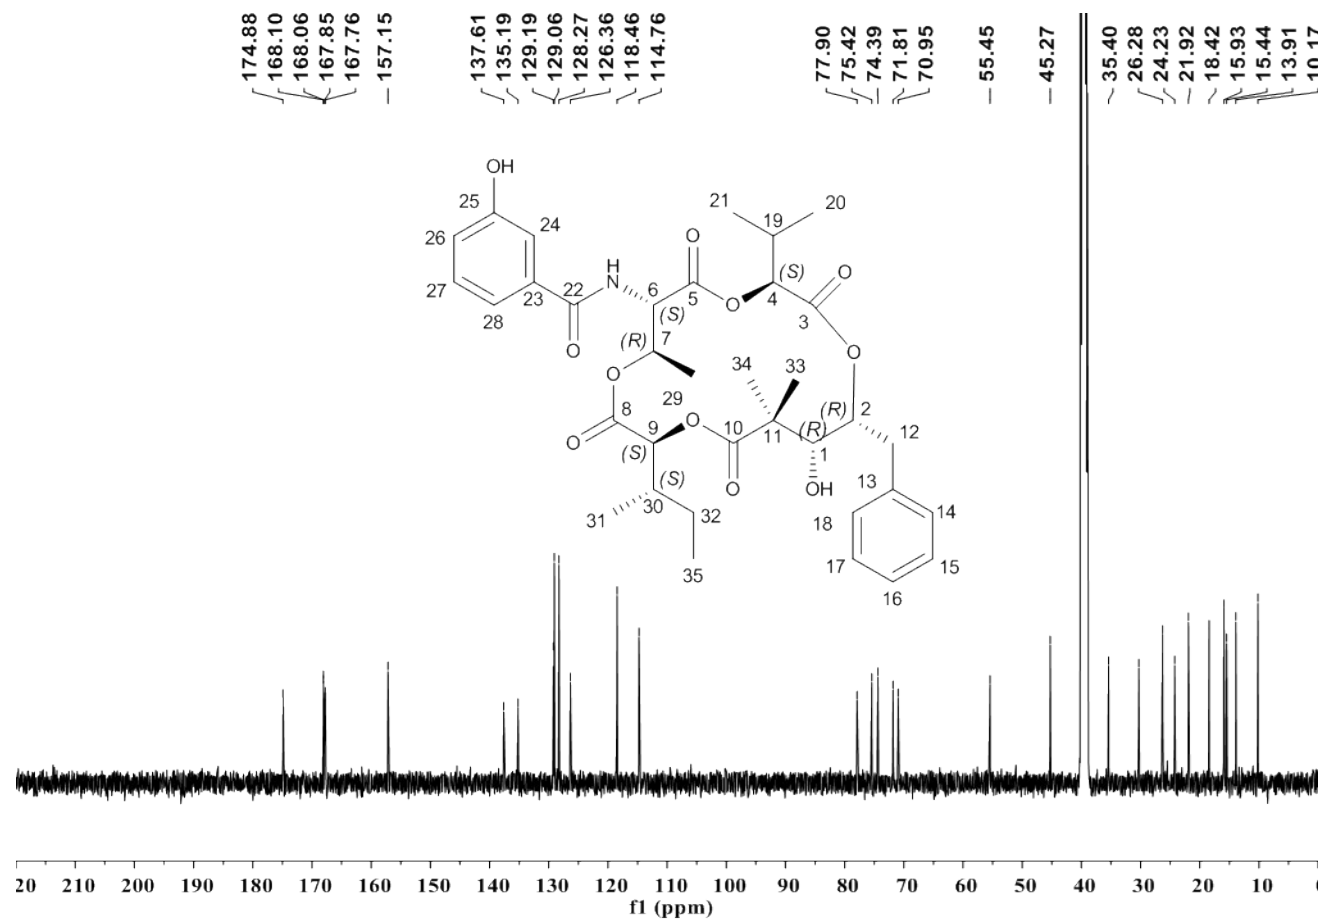

Figure S9b <sup>13</sup>C NMR spectrum of 8 in DMSO-*d*<sub>6</sub>

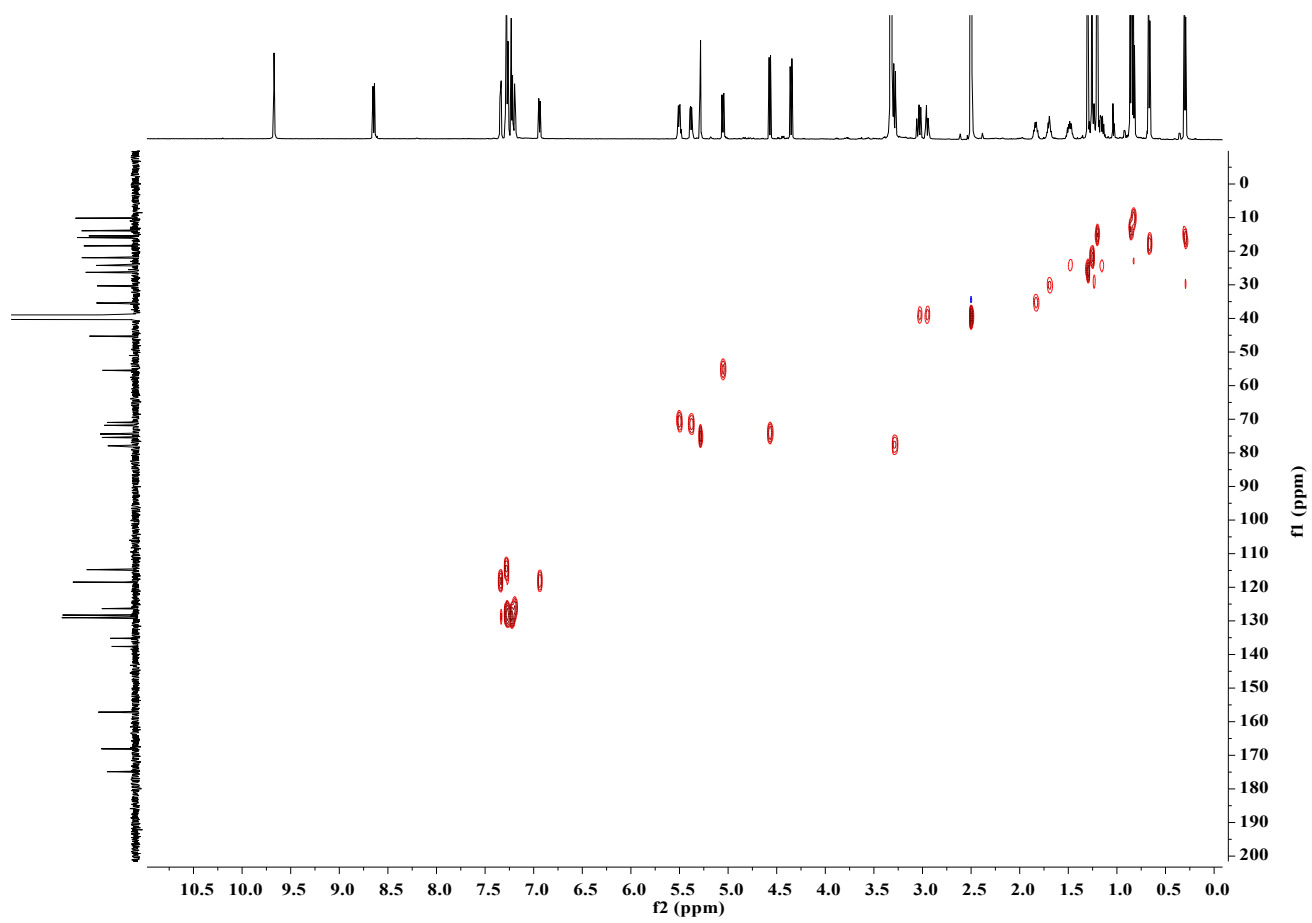

Figure S9c HSQC spectrum of 8 in DMSO- $d_6$



Figure S9d HMBC spectrum of 8 in DMSO-*d*<sub>6</sub>

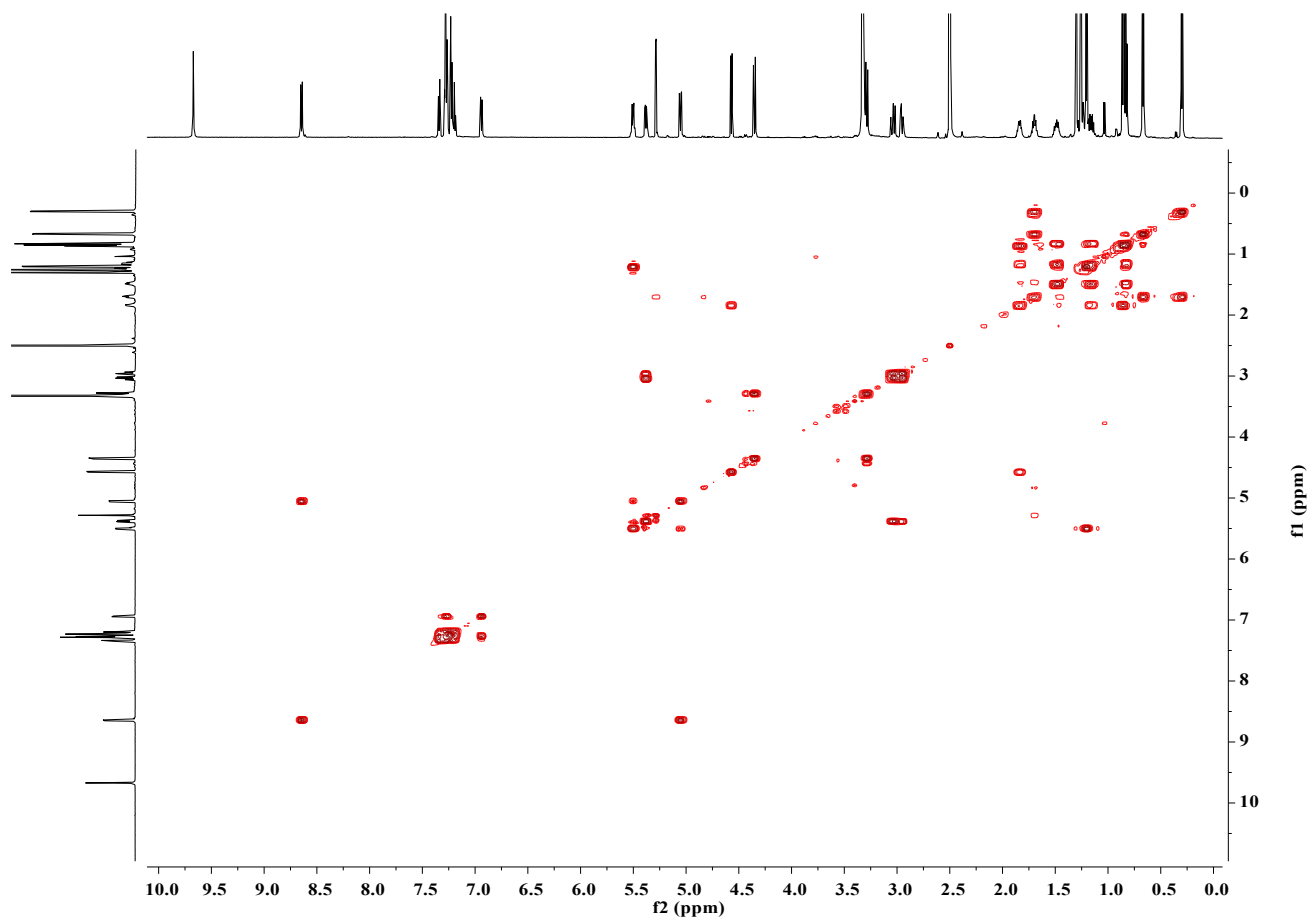

Figure S9e <sup>1</sup>H-<sup>1</sup>H COSY spectrum of 8 in DMSO-*d*<sub>6</sub>

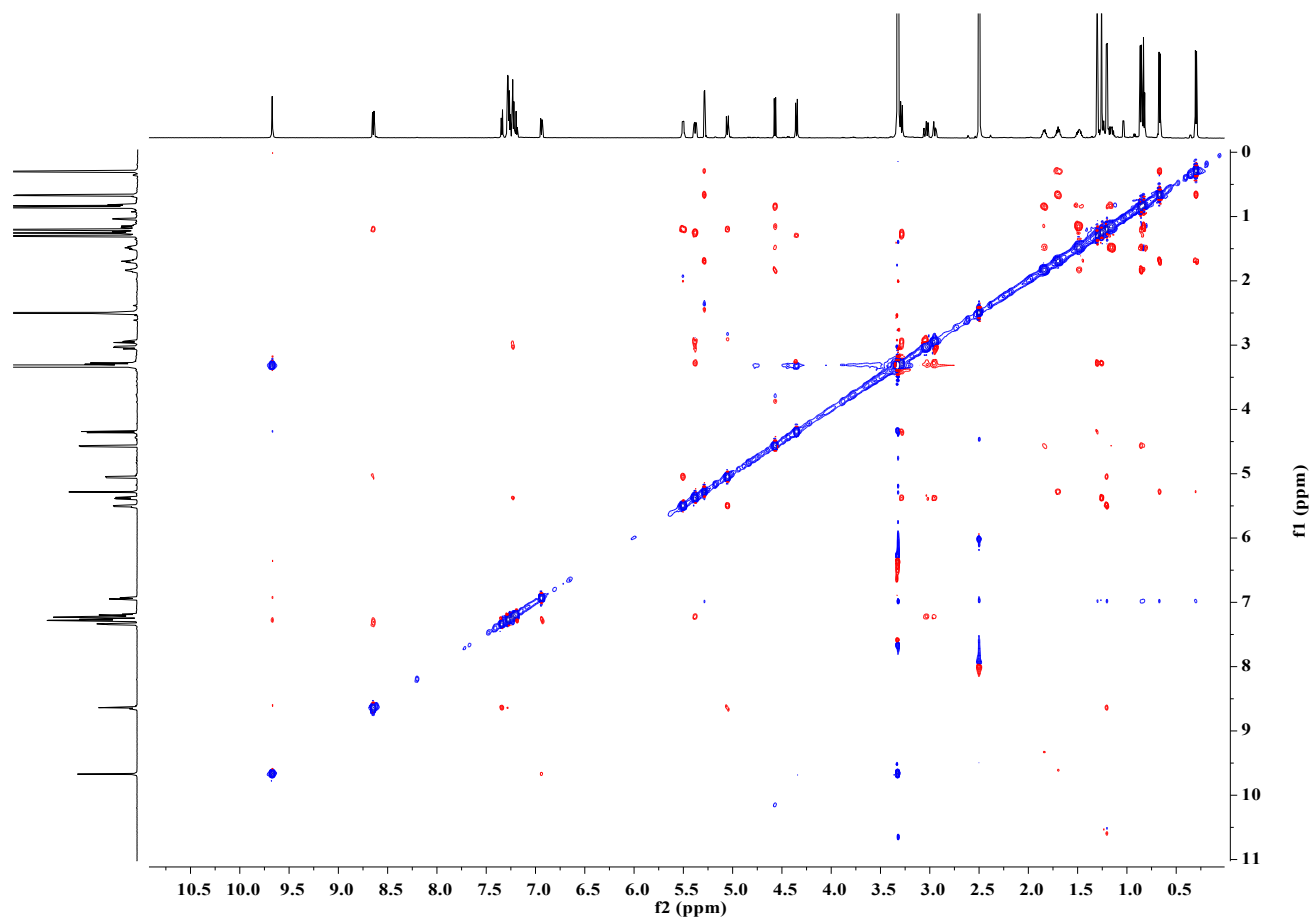

Figure S9f ROESY spectrum of 8 in DMSO-*d*<sub>6</sub>

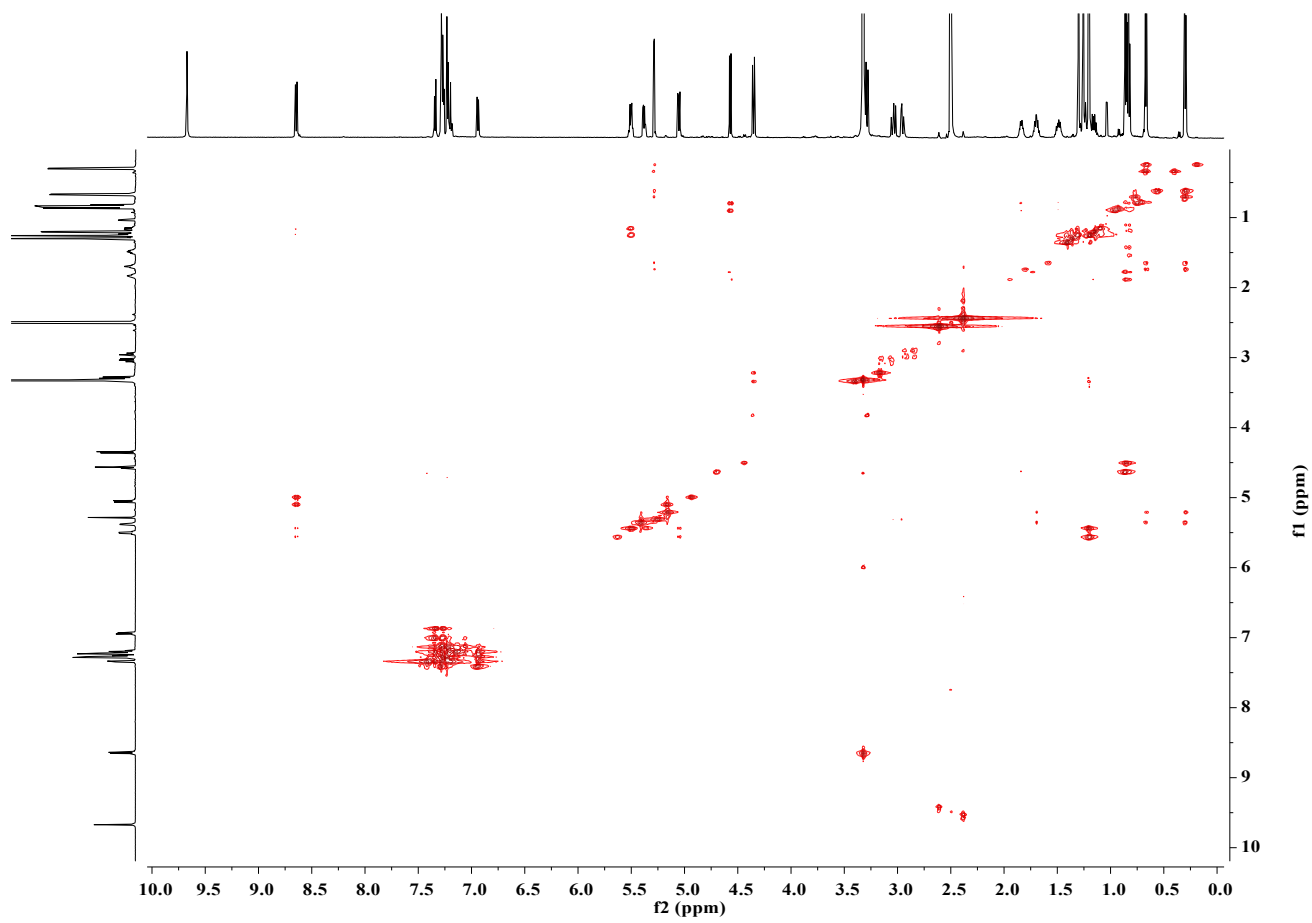

Figure S9g HETLOC spectrum of 8 in DMSO- $d_6$

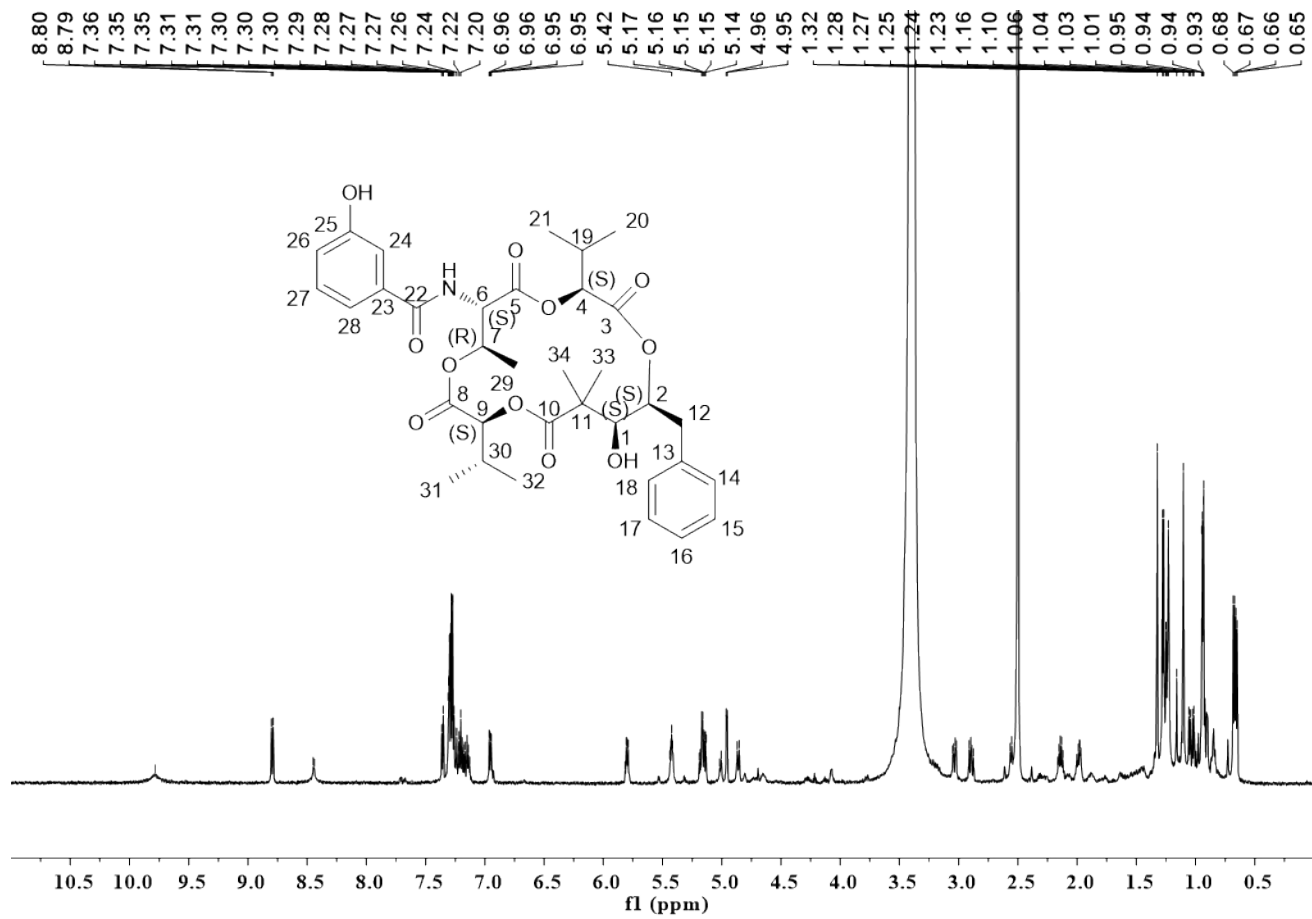

Figure S10 <sup>1</sup>H NMR spectrum of 9 in DMSO-*d*<sub>6</sub>



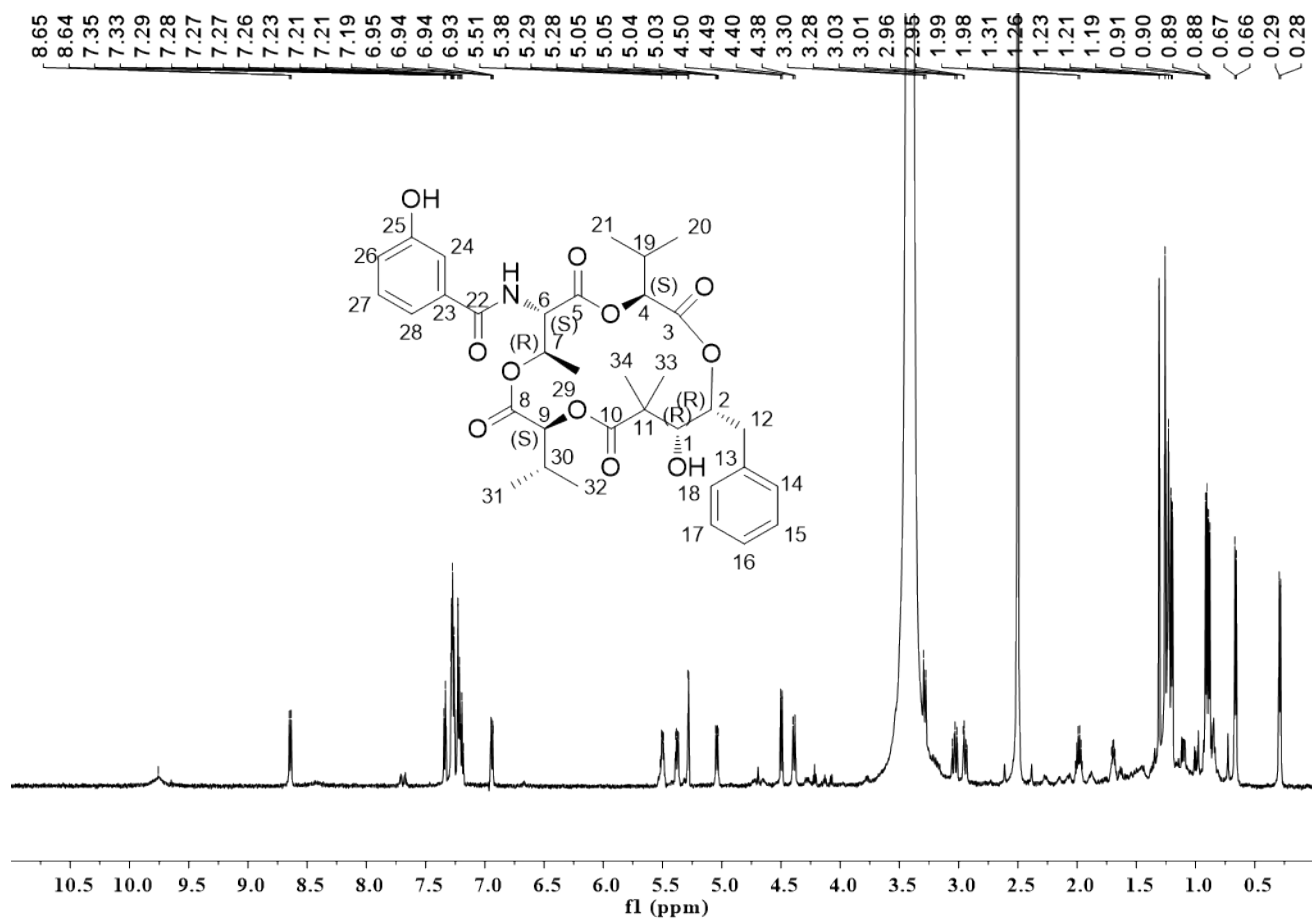

Figure S11 <sup>1</sup>H NMR spectrum of 10 in DMSO-*d*<sub>6</sub>

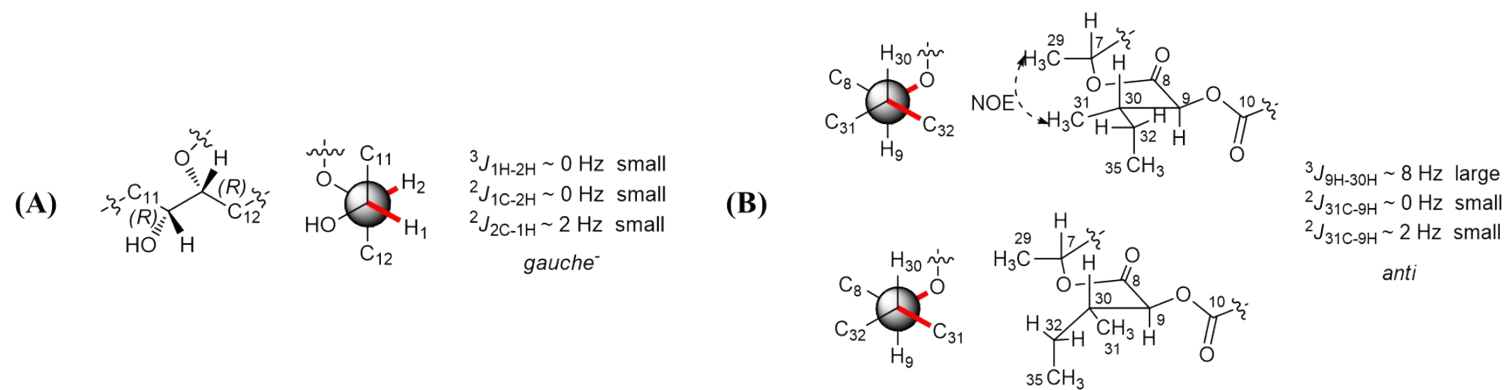

**Figure S12 Relative Stereochemical Analysis of NATs**

(A) The Relative stereochemistry of C-1 and C-2; (B) The Relative stereochemistry of C-9 and C-30

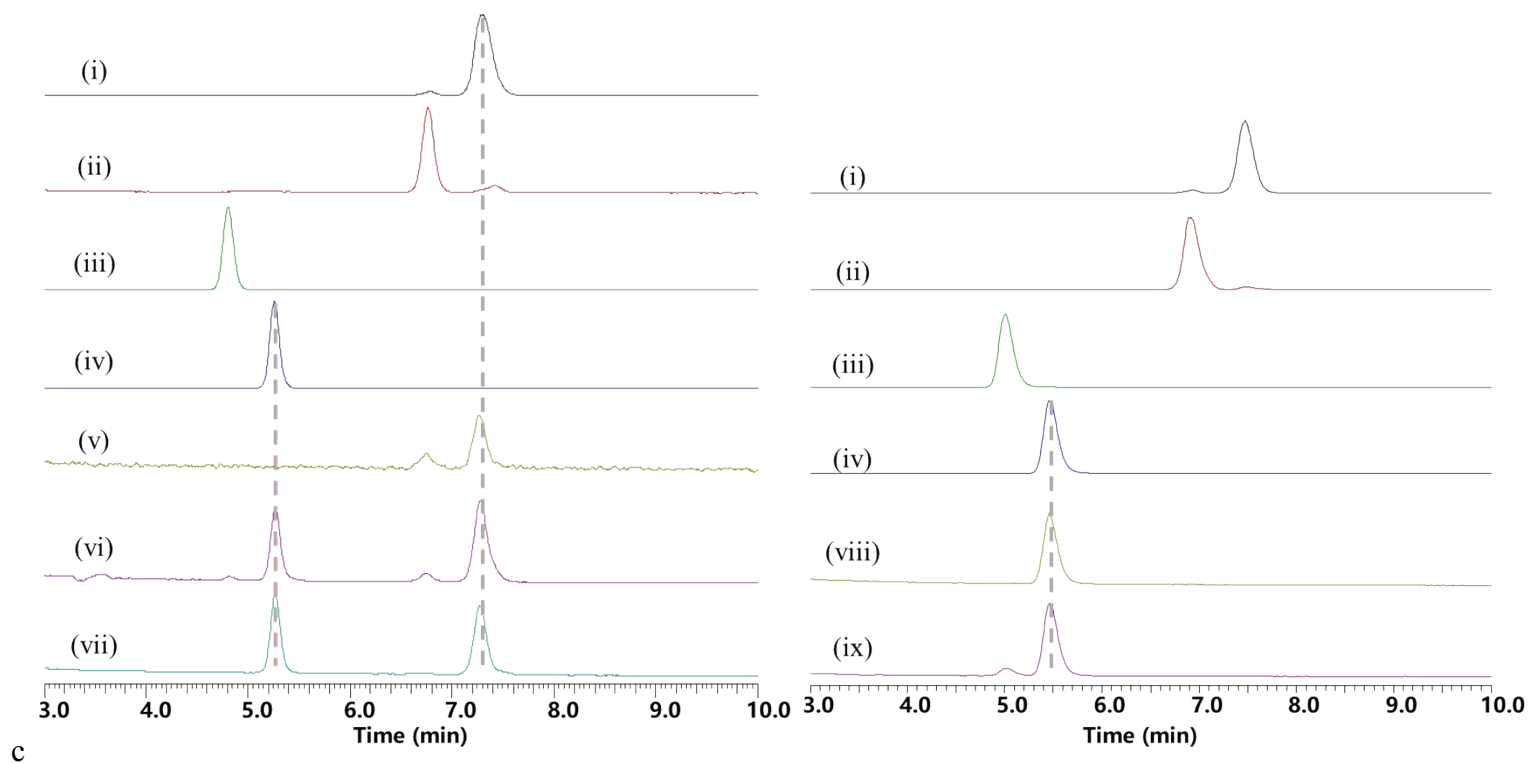

**Figure S13 LC-MS chromatogram of extracted ion at 333 [M - H]<sup>-</sup> and 347 [M - H]<sup>-</sup> from Mosher's esterification reaction of 6-10**

(i) *L*-Ila reacted with *R*-MTPA-Cl, (ii) *D*-Ila reacted with *R*-MTPA-Cl, (iii) (2*R*)-Hia reacted with *R*-MTPA-Cl, (iv) (2*S*)-Hia reacted with *R*-MTPA-Cl, (v) Hydrolysate of **6** reacted with *R*-MTPA-Cl, (vi) Hydrolysate of **7** reacted with *R*-MTPA-Cl, (vii) Hydrolysate of **8** reacted with *R*-MTPA-Cl, (viii) Hydrolysate of **9** reacted with *R*-MTPA-Cl, (ix) Hydrolysate of **10** reacted with *R*-MTPA-Cl

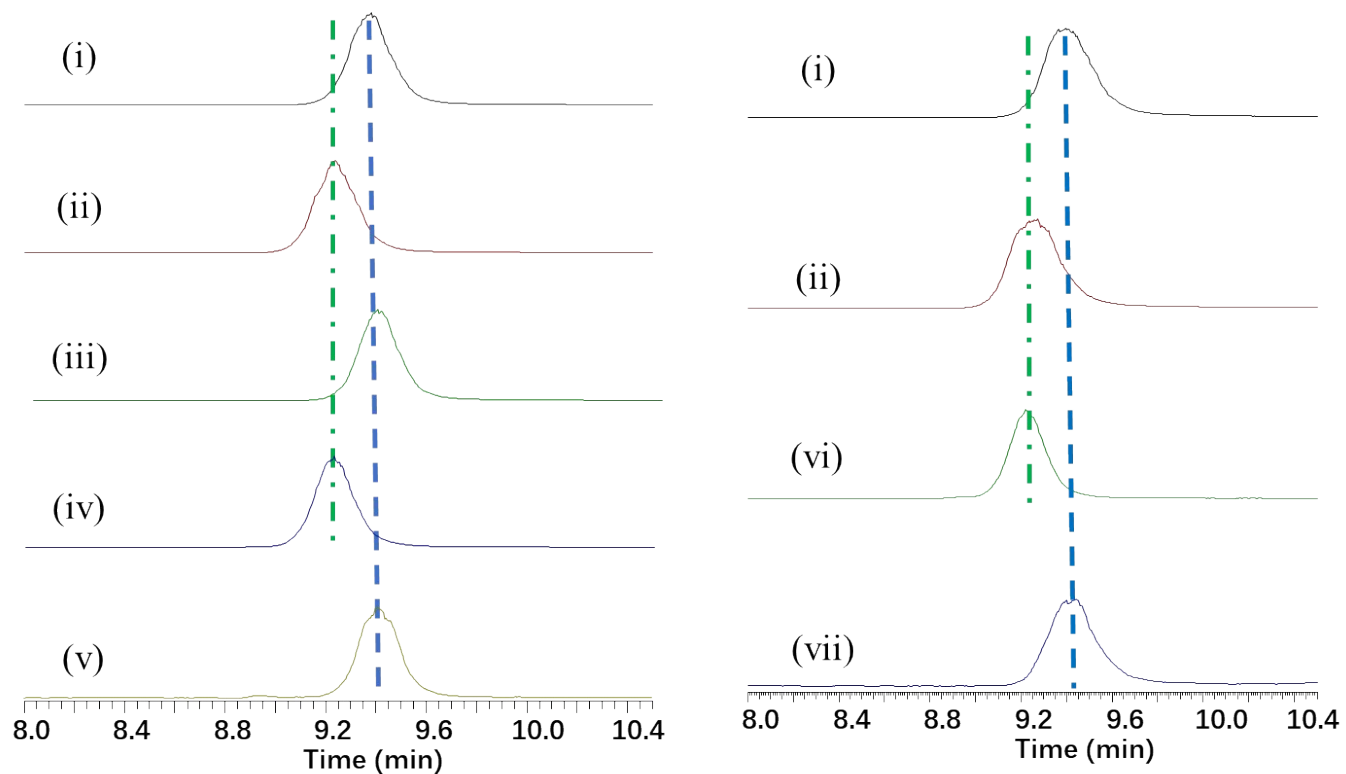

**Figure S14 LC-MS chromatogram of extracted ion at 437 [M + H]<sup>+</sup> from Mosher's esterification reaction of 6-10**

(i) (4*R*, 5*R*)-Bhdo reacted with *R*-MTPA-Cl, (ii) (4*R*, 5*R*)-Bhdo reacted with *S*-MTPA-Cl, (iii) Hydrolysed sample of **6** reacted with *R*-MTPA-Cl, (iv) Hydrolysed sample of **7** reacted with *R*-MTPA-Cl, (v) Hydrolysed sample of **8** reacted with *R*-MTPA-Cl, (vi) Hydrolysed sample of **9** reacted with *R*-MTPA-Cl, (vii) Hydrolysed sample of **10** reacted with *R*-MTPA-Cl

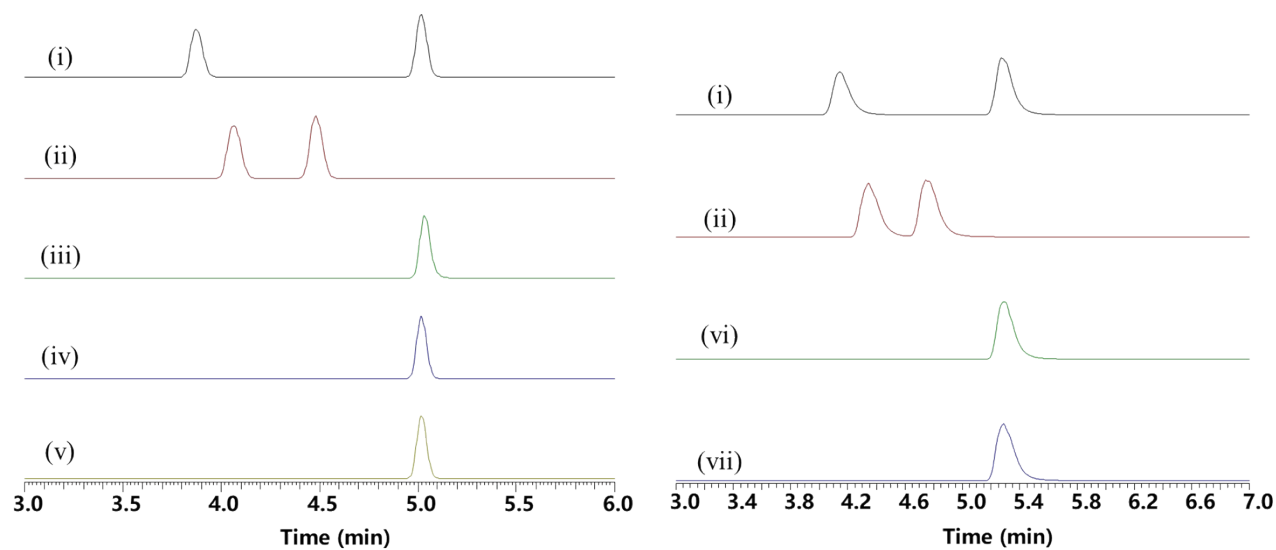

**Figure S15 LC-MS chromatogram of extracted ion at 412 [M - H]<sup>-</sup> from FDLA 6-10**

- (i) Standard *L*-threonine reacted with *L*-FDLA or *D*-FDLA to give (a) *L*-FDAA-*L*-Thr, (b) *D*-FDAA-*L*-Thr
- (ii) Standard *L*-allo-Thr reacted with *L*-FDLA or *D*-FDLA to give (a) *L*-FDAA-*L*-allo-Thr, (b) *D*-FDAA-*L*-allo-Thr
- (iii) Hydrolysate of **6** reacted with *D*-FDLA
- (iv) Hydrolysate of **7** reacted with *D*-FDLA
- (v) Hydrolysate of **8** reacted with *D*-FDLA
- (vi) Hydrolysate of **9** reacted with *D*-FDLA
- (vii) Hydrolysate of **10** reacted with *D*-FDLA
